# Supplementary material for: Stable, Environmental Specific and Novel QTL Identification as Well as Genetic Dissection of Fatty Acid Metabolism in Brassica napus
Source: Front Plant Sci. 2018 Jul 17;9:1018. doi: 10.3389/fpls.2018.01018 (PMC6057442; doi:10.3389/fpls.2018.01018)
Supplement: Table S5 — The screened FA metabolism related candidate genes underlying the CI of unique QTL. The candidate genes with bold indicated that they were located in the major QTL region. The involved consensus QTL in bold were the QTL with positive additive effect and the rest with the negative additive effect. [file Table_5.XLSX]

## Sheet: Table S5
Table S5 The screened fatty acid metabolism related candidates underlying the confidence interval of unique QTL.
A.thaliana Locus	Gene alias	abbreviation	Involved Uconsensus QTL	Involved Pathway	Description
AT3G47360	BnaA03g42210D	ATHSD3/HSD3	ucqALA-A3-4	TAG Synthesis/oil content	hydroxysteroid dehydrogenase 3 (HSD3); FUNCTIONS IN: oxidoreductase activity, binding, catalytic activity; INVOLVED IN: oxidation reduction, metabolic process; LOCATED IN: endomembrane system; CONTAINS InterPro DOMAIN/s: Short-chain dehydrogenase/reductase, conserved site (InterPro:IPR020904), NAD(P)-binding domain (InterPro:IPR016040), Glucose/ribitol dehydrogenase (InterPro:IPR002347), Short-ch…
	BnaC07g33280D		ucqALA-C7-1
AT4G25140	BnaA03g47170D	OLE1/OLEO1/OLEOSIN 1	ucqALA-C7-2, ucqFAS-C7	TAG Synthesis/oil content	oleosin 1 (OLEO1); FUNCTIONS IN: molecular_function unknown; INVOLVED IN: response to freezing, lipid storage, seed germination, seed oilbody biogenesis; LOCATED IN: monolayer-surrounded lipid storage body, integral to membrane, membrane; EXPRESSED IN: shoot apex; CONTAINS InterPro DOMAIN/s: Oleosin (InterPro:IPR000136); BEST Arabidopsis thaliana protein match is: oleosin3 (TAIR:AT5G51210.1); Has…
	BnaC07g39370D		ucqALA-A3-5
AT5G55240	BnaA10g09480D	ATPXG2	ucqLA-A10	TAG Synthesis/oil content	ARABIDOPSIS THALIANA PEROXYGENASE 2 (ATPXG2); CONTAINS InterPro DOMAIN/s: Caleosin related (InterPro:IPR007736); BEST Arabidopsis thaliana protein match is: seed gene 1 (TAIR:AT4G26740.1); Has 1807 Blast hits to 1807 proteins in 277 species: Archae - 0; Bacteria - 0; Metazoa - 736; Fungi - 347; Plants - 385; Viruses - 0; Other Eukaryotes - 339 (source: NCBI BLink).
AT5G07560	BnaC02g01550D	ATGRP20/GRP20	ucqALA-C2-1	TAG Synthesis/oil content	glycine-rich protein 20 (GRP20); FUNCTIONS IN: lipid binding, nutrient reservoir activity; INVOLVED IN: lipid storage, sexual reproduction; LOCATED IN: monolayer-surrounded lipid storage body, integral to membrane, membrane; EXPRESSED IN: petal, leaf whorl, sepal, flower; EXPRESSED DURING: 4 anthesis, petal differentiation and expansion stage; CONTAINS InterPro DOMAIN/s: Oleosin (InterPro:IPR0001…
AT1G70670	BnaA02g15090D	CLO4/ATCLO4/PXG4	ucqLA-A2-2	TAG Synthesis	Caleosin-related family protein; CONTAINS InterPro DOMAIN/s: Caleosin related (InterPro:IPR007736); BEST Arabidopsis thaliana protein match is: Caleosin-related family protein (TAIR:AT1G70680.1); Has 341 Blast hits to 336 proteins in 61 species: Archae - 0; Bacteria - 0; Metazoa - 0; Fungi - 60; Plants - 278; Viruses - 0; Other Eukaryotes - 3 (source: NCBI BLink).
	BnaA07g28790D		ucqALA-A7
AT2G25170	BnaA03g51810D	PKL/CHD3/CHR6/CKH2/GYM	ucqALA-A3-6	TAG Synthesis	PICKLE (PKL); CONTAINS InterPro DOMAIN/s: Protein of unknown function DUF1087 (InterPro:IPR009463), Zinc finger, RING-type (InterPro:IPR001841), Zinc finger, PHD-type, conserved site (InterPro:IPR019786), Zinc finger, PHD-type (InterPro:IPR001965), Protein of unknown function DUF1086 (InterPro:IPR009462), Chromo domain (InterPro:IPR000953), SNF2-related (InterPro:IPR000330), DEAD-like helicase, N…
AT4G32010	BnaA03g51860D	HSL1/VAL2	ucqALA-A3-6	TAG Synthesis	HSI2-like 1 (HSL1); CONTAINS InterPro DOMAIN/s: Transcriptional factor B3 (InterPro:IPR003340), Zinc finger, CW-type (InterPro:IPR011124); BEST Arabidopsis thaliana protein match is: high-level expression of sugar-inducible gene 2 (TAIR:AT2G30470.1); Has 1397 Blast hits to 1364 proteins in 123 species: Archae - 0; Bacteria - 0; Metazoa - 122; Fungi - 0; Plants - 1204; Viruses - 0; Other Eukaryote…
AT2G30470	BnaA05g11980D	HSI2/VAL1	ucqALA-A5-4	TAG Synthesis	high-level expression of sugar-inducible gene 2 (HSI2); CONTAINS InterPro DOMAIN/s: Transcriptional factor B3 (InterPro:IPR003340), Zinc finger, CW-type (InterPro:IPR011124); BEST Arabidopsis thaliana protein match is: HSI2-like 1 (TAIR:AT4G32010.1); Has 1263 Blast hits to 1242 proteins in 97 species: Archae - 0; Bacteria - 5; Metazoa - 31; Fungi - 0; Plants - 1168; Viruses - 0; Other Eukaryotes …
AT2G41540	BnaA05g02270D	GPDHC1	ucqALA-A5-2	TAG Synthesis	GPDHC1; CONTAINS InterPro DOMAIN/s: 6-phosphogluconate dehydrogenase, C-terminal-like (InterPro:IPR008927), Dehydrogenase, multihelical (InterPro:IPR013328), NAD(P)-binding domain (InterPro:IPR016040), NAD-dependent glycerol-3-phosphate dehydrogenase, C-terminal (InterPro:IPR006109), NAD-dependent glycerol-3-phosphate dehydrogenase, N-terminal (InterPro:IPR011128), NAD-dependent glycerol-3-phosph…
AT1G54060	BnaA06g01360D	ASIL1	ucqALA-A6-1	TAG Synthesis	6B-interacting protein 1-like 1 (ASIL1); FUNCTIONS IN: sequence-specific DNA binding, sequence-specific DNA binding transcription factor activity; INVOLVED IN: response to auxin stimulus, regulation of shoot development, regulation of seed germination, regulation of transcription; LOCATED IN: nucleolus, nucleus; EXPRESSED IN: 22 plant structures; EXPRESSED DURING: 16 growth stages; BEST Arabidops…
AT5G42870	BnaA06g37030D	PAH2	ucqALA-A6-6	TAG Synthesis	phosphatidic acid phosphohydrolase 2 (PAH2); FUNCTIONS IN: phosphatidate phosphatase activity; INVOLVED IN: cellular response to phosphate starvation, lipid metabolic process; LOCATED IN: apoplast, membrane; EXPRESSED IN: 24 plant structures; EXPRESSED DURING: 13 growth stages; CONTAINS InterPro DOMAIN/s: LNS2, Lipin/Ned1/Smp2 (InterPro:IPR013209), Lipin, N-terminal conserved region (InterPro:IPR…
AT1G71697	BnaA07g29470D	CEK1/ATCEK1/F26A9.3	ucq-ALA-A7,ucqPA-A7-3	TAG Synthesis	choline kinase 1 (CK1); FUNCTIONS IN: choline kinase activity; INVOLVED IN: response to salt stress, response to wounding; LOCATED IN: cellular_component unknown; EXPRESSED IN: 24 plant structures; EXPRESSED DURING: 15 growth stages; CONTAINS InterPro DOMAIN/s: Choline kinase, N-terminal (InterPro:IPR007521), Choline/ethanolamine kinase (InterPro:IPR002573), Protein kinase-like domain (InterPro:I…
AT1G74320	BnaA07g31430D	CEK2	ucq-ALA-A7,ucqPA-A7-3	TAG Synthesis	Protein kinase superfamily protein; CONTAINS InterPro DOMAIN/s: Choline/ethanolamine kinase (InterPro:IPR002573), Protein kinase-like domain (InterPro:IPR011009); BEST Arabidopsis thaliana protein match is: Protein kinase superfamily protein (TAIR:AT4G09760.1); Has 1486 Blast hits to 1432 proteins in 373 species: Archae - 0; Bacteria - 346; Metazoa - 438; Fungi - 245; Plants - 167; Viruses - 0; O…
AT1G48300	BnaA08g03400D	DGAT3	ucqLA-A8-2, ucqEA-A8-3	TAG Synthesis	unknown protein; FUNCTIONS IN: molecular_function unknown; INVOLVED IN: biological_process unknown; LOCATED IN: endomembrane system; EXPRESSED IN: 24 plant structures; EXPRESSED DURING: 15 growth stages; Has 96 Blast hits to 87 proteins in 37 species: Archae - 0; Bacteria - 2; Metazoa - 12; Fungi - 2; Plants - 65; Viruses - 0; Other Eukaryotes - 15 (source: NCBI BLink).
AT3G18850	BnaC01g33800D	LPAT5	ucqSA-C1	TAG Synthesis	lysophosphatidyl acyltransferase 5 (LPAT5); FUNCTIONS IN: acyltransferase activity; INVOLVED IN: metabolic process; EXPRESSED IN: 24 plant structures; EXPRESSED DURING: 13 growth stages; CONTAINS InterPro DOMAIN/s: Phospholipid/glycerol acyltransferase (InterPro:IPR002123); BEST Arabidopsis thaliana protein match is: lysophosphatidyl acyltransferase 4 (TAIR:AT1G75020.2); Has 1643 Blast hits to 16…
AT3G09560	BnaC05g43390D	ATPAH1/PAH1	ucqLA-C5-2	TAG Synthesis	Lipin family protein; FUNCTIONS IN: phosphatidate phosphatase activity; INVOLVED IN: cellular response to phosphate starvation, lipid metabolic process; LOCATED IN: cellular_component unknown; EXPRESSED IN: 24 plant structures; EXPRESSED DURING: 14 growth stages; CONTAINS InterPro DOMAIN/s: LNS2, Lipin/Ned1/Smp2 (InterPro:IPR013209), Lipin, N-terminal conserved region (InterPro:IPR007651); BEST A…
AT3G07690	BnaC05g44270D	AT3G07690	ucqFAS-C5-1	TAG Synthesis	6-phosphogluconate dehydrogenase family protein; FUNCTIONS IN: in 8 functions; INVOLVED IN: oxidation reduction, glycerol-3-phosphate catabolic process, glycerol-3-phosphate metabolic process, carbohydrate metabolic process, metabolic process; LOCATED IN: glycerol-3-phosphate dehydrogenase complex, cytoplasm; EXPRESSED IN: 15 plant structures; EXPRESSED DURING: 7 growth stages; CONTAINS InterPro …
AT2G32260	BnaC08g44190D	ATCCT1/CCT1	ucqALA-C8-1	TAG Synthesis	phosphorylcholine cytidylyltransferase (CCT1); CONTAINS InterPro DOMAIN/s: Rossmann-like alpha/beta/alpha sandwich fold (InterPro:IPR014729), Cytidyltransferase-related (InterPro:IPR004821), Cytidylyltransferase (InterPro:IPR004820); BEST Arabidopsis thaliana protein match is: phosphorylcholine cytidylyltransferase2 (TAIR:AT4G15130.1); Has 2466 Blast hits to 2109 proteins in 632 species: Archae -…
AT1G08510	BnaA10g09300D	FATB	ucqLA-A10	Plastidial Fatty Acid Synthesis	fatty acyl-ACP thioesterases B (FATB); CONTAINS InterPro DOMAIN/s: Acyl-ACP-thioesterase, N-terminal domain (InterPro:IPR021113), Acyl-ACP thioesterase (InterPro:IPR002864); BEST Arabidopsis thaliana protein match is: fatA acyl-ACP thioesterase (TAIR:AT3G25110.1); Has 1275 Blast hits to 1274 proteins in 533 species: Archae - 0; Bacteria - 944; Metazoa - 0; Fungi - 0; Plants - 322; Viruses - 0; Ot…
	BnaC05g06160D		ucqEIA-C5
	BnaC08g43130D		ucqALA-C8-1,ucqALA-C8-2
AT4G16155	BnaA03g42400D	AT4G16155	ucqALA-C7-1	Plastidial Fatty Acid Synthesis	dihydrolipoyl dehydrogenases; FUNCTIONS IN: dihydrolipoyl dehydrogenase activity; INVOLVED IN: oxidation reduction, cell redox homeostasis; LOCATED IN: chloroplast, chloroplast envelope; EXPRESSED IN: 23 plant structures; EXPRESSED DURING: 14 growth stages; CONTAINS InterPro DOMAIN/s: FAD-dependent pyridine nucleotide-disulphide oxidoreductase (InterPro:IPR013027), Pyridine nucleotide-disulphide …
	BnaC07g33500D		ucqALA-A3-4
AT4G25050	BnaA03g47100D	ACP4	ucqALA-A3-5	Plastidial Fatty Acid Synthesis	acyl carrier protein 4 (ACP4); FUNCTIONS IN: acyl carrier activity; INVOLVED IN: response to light stimulus, fatty acid biosynthetic process; LOCATED IN: chloroplast stroma, chloroplast, chloroplast envelope; EXPRESSED IN: 22 plant structures; EXPRESSED DURING: 14 growth stages; CONTAINS InterPro DOMAIN/s: Phosphopantetheine-binding (InterPro:IPR006163), Acyl carrier protein (ACP) (InterPro:IPR00…
	BnaC07g39270D		ucqALA-C7-2, ucqFAS-C7
AT4G31050	BnaA08g12720D	LIP2	ucqFAS-A8-8,ucqOA-A8-8	Plastidial Fatty Acid Synthesis	Biotin/lipoate A/B protein ligase family; FUNCTIONS IN: lipoyltransferase activity, octanoyltransferase activity, catalytic activity; INVOLVED IN: protein modification process, lipoate biosynthetic process; LOCATED IN: cytoplasm; EXPRESSED IN: 22 plant structures; EXPRESSED DURING: 13 growth stages; CONTAINS InterPro DOMAIN/s: Octanoyltransferase, conserved site (InterPro:IPR020605), Octanoyltran…
	BnaC01g07340D		ucqALA-C1-1
AT5G35360	BnaA09g48250D	CAC2	ucqLA-A9-5	Plastidial Fatty Acid Synthesis	acetyl Co-enzyme a carboxylase biotin carboxylase subunit (CAC2); FUNCTIONS IN: biotin carboxylase activity, acetyl-CoA carboxylase activity; INVOLVED IN: fatty acid biosynthetic process; LOCATED IN: chloroplast, chloroplast stroma, chloroplast envelope; EXPRESSED IN: 25 plant structures; EXPRESSED DURING: 16 growth stages; CONTAINS InterPro DOMAIN/s: Carbamoyl phosphate synthase, large subunit, …
	BnaC05g07580D		ucqEIA-C5
AT3G25860	BnaA09g19620D	LTA2/PLE2	ucqALA-A9-6	Plastidial Fatty Acid Synthesis	LTA2; FUNCTIONS IN: dihydrolipoyllysine-residue acetyltransferase activity; INVOLVED IN: metabolic process, acetyl-CoA biosynthetic process from pyruvate; LOCATED IN: cytosolic ribosome, chloroplast stroma, chloroplast, membrane, chloroplast envelope; EXPRESSED IN: 24 plant structures; EXPRESSED DURING: 15 growth stages; CONTAINS InterPro DOMAIN/s: 2-oxo acid dehydrogenase, lipoyl-binding site (I…
AT2G43710	BnaA05g03490D	FAB2/SSI2	ucqALA-A5-3	Plastidial Fatty Acid Synthesis	SSI2; FUNCTIONS IN: acyl-[acyl-carrier-protein] desaturase activity, stearoyl-CoA 9-desaturase activity; INVOLVED IN: in 10 processes; LOCATED IN: chloroplast, chloroplast stroma, plastid; EXPRESSED IN: 22 plant structures; EXPRESSED DURING: 15 growth stages; CONTAINS InterPro DOMAIN/s: Ribonucleotide reductase-related (InterPro:IPR012348), Ferritin/ribonucleotide reductase-like (InterPro:IPR0090…
AT1G74960	BnaA06g13360D	FAB1	ucqLA-A6-1	Plastidial Fatty Acid Synthesis	fatty acid biosynthesis 1 (FAB1); CONTAINS InterPro DOMAIN/s: Beta-ketoacyl synthase (InterPro:IPR000794), Thiolase-like (InterPro:IPR016039), Beta-ketoacyl synthase, C-terminal (InterPro:IPR014031), 3-oxoacyl-[acyl-carrier-protein] synthase 2 (InterPro:IPR017568), Beta-ketoacyl synthase, N-terminal (InterPro:IPR014030), Thiolase-like, subgroup (InterPro:IPR016038), Beta-ketoacyl synthase, active…
AT1G62610	BnaA06g25500D	AT1G62610	ucqLA-A6-2	Plastidial Fatty Acid Synthesis	NAD(P)-binding Rossmann-fold superfamily protein; FUNCTIONS IN: oxidoreductase activity, binding, catalytic activity; INVOLVED IN: oxidation reduction, metabolic process; LOCATED IN: cellular_component unknown; EXPRESSED IN: cultured cell; CONTAINS InterPro DOMAIN/s: Short-chain dehydrogenase/reductase, conserved site (InterPro:IPR020904), NAD(P)-binding domain (InterPro:IPR016040), Glucose/ribit…
AT3G55290	BnaA06g25540D	SDRD	ucqLA-A6-2	Plastidial Fatty Acid Synthesis	NAD(P)-binding Rossmann-fold superfamily protein; FUNCTIONS IN: oxidoreductase activity, binding, catalytic activity; INVOLVED IN: oxidation reduction, metabolic process; LOCATED IN: peroxisome; EXPRESSED IN: leaf; CONTAINS InterPro DOMAIN/s: Short-chain dehydrogenase/reductase, conserved site (InterPro:IPR020904), NAD(P)-binding domain (InterPro:IPR016040), Glucose/ribitol dehydrogenase (InterPr…
AT5G16390	BnaA03g06000D	BCCP/BCCP1/CAC1	ucqALA-A3-1	Plastidial Fatty Acid Synthesis	chloroplastic acetylcoenzyme A carboxylase 1 (CAC1); FUNCTIONS IN: acetyl-CoA carboxylase activity, biotin binding; INVOLVED IN: fatty acid biosynthetic process; LOCATED IN: chloroplast; EXPRESSED IN: 22 plant structures; EXPRESSED DURING: 13 growth stages; CONTAINS InterPro DOMAIN/s: Biotin-binding site (InterPro:IPR001882), Single hybrid motif (InterPro:IPR011053), Acetyl-CoA biotin carboxyl ca…
AT1G77590	BnaA10g20970D	LACS9	ucqALA-A10-1	Plastidial Fatty Acid Synthesis	long chain acyl-CoA synthetase 9 (LACS9); FUNCTIONS IN: long-chain fatty acid-CoA ligase activity; INVOLVED IN: fatty acid metabolic process, fatty acid biosynthetic process; LOCATED IN: chloroplast, membrane, chloroplast envelope; EXPRESSED IN: 25 plant structures; EXPRESSED DURING: 14 growth stages; CONTAINS InterPro DOMAIN/s: AMP-binding, conserved site (InterPro:IPR020845), AMP-dependent synt…
AT2G04350	BnaA10g24190D	LACS8	ucqALA-A10-2	Plastidial Fatty Acid Synthesis	long-chain acyl-CoA synthetase 8 (LACS8); FUNCTIONS IN: long-chain fatty acid-CoA ligase activity, catalytic activity; INVOLVED IN: fatty acid biosynthetic process, metabolic process; LOCATED IN: endoplasmic reticulum; EXPRESSED IN: 23 plant structures; EXPRESSED DURING: 13 growth stages; CONTAINS InterPro DOMAIN/s: AMP-binding, conserved site (InterPro:IPR020845), AMP-dependent synthetase/ligase…
AT5G08415	BnaC02g01120D	LIP1	ucqALA-C2-1	Plastidial Fatty Acid Synthesis	Radical SAM superfamily protein; FUNCTIONS IN: 4 iron, 4 sulfur cluster binding, lipoic acid synthase activity, iron-sulfur cluster binding, lipoate synthase activity, catalytic activity; INVOLVED IN: lipoic acid biosynthetic process, lipoate biosynthetic process, metabolic process; LOCATED IN: chloroplast; EXPRESSED IN: 24 plant structures; EXPRESSED DURING: 15 growth stages; CONTAINS InterPro D…
AT2G30200	BnaA05g12180D	EMB3147	ucqALA-A5-9	Plastidial Fatty Acid Synthesis	catalytics;transferases;[acyl-carrier-protein] S-malonyltransferases;binding; FUNCTIONS IN: binding, transferase activity, [acyl-carrier-protein] S-malonyltransferase activity, catalytic activity; INVOLVED IN: fatty acid biosynthetic process, metabolic process; LOCATED IN: chloroplast, chloroplast stroma; EXPRESSED IN: 23 plant structures; EXPRESSED DURING: 14 growth stages; CONTAINS InterPro DOM…
AT1G19440	BnaA06g13570D	KCS4	ucqLA-A6-1	Fatty Acid Elongation	3-ketoacyl-CoA synthase 4 (KCS4); FUNCTIONS IN: transferase activity, transferring acyl groups other than amino-acyl groups, catalytic activity; INVOLVED IN: very long-chain fatty acid metabolic process, cuticle development; LOCATED IN: membrane; EXPRESSED IN: 25 plant structures; EXPRESSED DURING: 15 growth stages; CONTAINS InterPro DOMAIN/s: Thiolase-like (InterPro:IPR016039), Very-long-chain 3…
	BnaA06g13650D		ucqLA-A6-1
	BnaC08g36720D		ucqALA-C8-1
	BnaC08g36720D		ucqFAS-C8
	BnaC08g36720D		ucqALA-C8-1
AT4G34520	BnaA08g11130D	KCS18/FAE1	ucqEA-A8-6,ucqOA-A8-4,ucqPA-A8-1,ucqEIA-A8-1	Fatty Acid Elongation	3-ketoacyl-CoA synthase 18 (KCS18); FUNCTIONS IN: fatty acid elongase activity, acyltransferase activity; INVOLVED IN: fatty acid elongation, very long-chain fatty acid metabolic process; LOCATED IN: endomembrane system, membrane; EXPRESSED IN: shoot apex, stem, fruit, carpel; EXPRESSED DURING: petal differentiation and expansion stage; CONTAINS InterPro DOMAIN/s: Thiolase-like (InterPro:IPR01603…
	BnaC03g65980D		ucqFAS-C3-4,ucqEA-C3-3,ucq-EIA-C3-2
AT4G34510	BnaA08g11140D	KCS17	ucqEA-C3-4,ucqLA-C3-3,ucqOA-C3-5,ucqPA-C3-2,ucqSA-C3-4,ucqEIA-C3-3	Fatty Acid Elongation	3-ketoacyl-CoA synthase 17 (KCS17); FUNCTIONS IN: transferase activity, transferring acyl groups other than amino-acyl groups, catalytic activity, acyltransferase activity; INVOLVED IN: fatty acid elongation, very long-chain fatty acid metabolic process; LOCATED IN: membrane; EXPRESSED IN: 6 plant structures; EXPRESSED DURING: 4 anthesis, petal differentiation and expansion stage; CONTAINS InterP…
	BnaC03g66040D		ucqEA-A8-6,ucqOA-A8-4,ucqPA-A8-1,ucqEIA-A8-1
AT2G16280	BnaA09g08660D	KCS9	ucqFAS-A9-5	Fatty Acid Elongation	3-ketoacyl-CoA synthase 9 (KCS9); FUNCTIONS IN: transferase activity, transferring acyl groups other than amino-acyl groups, catalytic activity; INVOLVED IN: response to cold, response to light stimulus, very long-chain fatty acid metabolic process, response to osmotic stress, cuticle development; LOCATED IN: membrane; EXPRESSED IN: 25 plant structures; EXPRESSED DURING: 13 growth stages; CONTAIN…
	BnaA09g08670D		ucqFAS-A9-5
AT1G07720	BnaA06g04280D	KCS3	ucqALA-A6-1	Fatty Acid Elongation	3-ketoacyl-CoA synthase 3 (KCS3); FUNCTIONS IN: transferase activity, transferring acyl groups other than amino-acyl groups, catalytic activity, acyltransferase activity; INVOLVED IN: response to cold, response to light stimulus, response to osmotic stress; LOCATED IN: endoplasmic reticulum; EXPRESSED IN: 24 plant structures; EXPRESSED DURING: 13 growth stages; CONTAINS InterPro DOMAIN/s: Thiolas…
AT5G43760	BnaA06g36580D	KCS20	ucqALA-A6-6	Fatty Acid Elongation	3-ketoacyl-CoA synthase 20 (KCS20); FUNCTIONS IN: fatty acid elongase activity; INVOLVED IN: response to cold, response to light stimulus, response to osmotic stress; LOCATED IN: membrane; EXPRESSED IN: 28 plant structures; EXPRESSED DURING: 13 growth stages; CONTAINS InterPro DOMAIN/s: Thiolase-like (InterPro:IPR016039), Very-long-chain 3-ketoacyl-CoA synthase (InterPro:IPR012392), 3-Oxoacyl-[ac…
AT1G67730	BnaA07g26670D	KCR1	ucq-ALA-A7	Fatty Acid Elongation	beta-ketoacyl reductase 1 (KCR1); FUNCTIONS IN: oxidoreductase activity, ketoreductase activity, acetoacetyl-CoA reductase activity; INVOLVED IN: very long-chain fatty acid biosynthetic process, embryo development, cuticle development; LOCATED IN: endoplasmic reticulum, membrane; EXPRESSED IN: 26 plant structures; EXPRESSED DURING: 14 growth stages; CONTAINS InterPro DOMAIN/s: Short-chain dehydro…
AT1G01120	BnaA09g51530D	KCS1	ucqLA-A9-5	Fatty Acid Elongation	3-ketoacyl-CoA synthase 1 (KCS1); FUNCTIONS IN: fatty acid elongase activity, acyltransferase activity; INVOLVED IN: in 7 processes; LOCATED IN: cytosolic ribosome, endoplasmic reticulum, membrane; EXPRESSED IN: 29 plant structures; EXPRESSED DURING: 13 growth stages; CONTAINS InterPro DOMAIN/s: Thiolase-like (InterPro:IPR016039), Very-long-chain 3-ketoacyl-CoA synthase (InterPro:IPR012392), 3-Ox…
AT5G10480	BnaA10g21780D	PAS2	ucqALA-A10-1	Fatty Acid Elongation	PASTICCINO 2 (PAS2); CONTAINS InterPro DOMAIN/s: Protein-tyrosine phosphatase-like, PTPLA (InterPro:IPR007482); BEST Arabidopsis thaliana protein match is: Protein-tyrosine phosphatase-like, PTPLA (TAIR:AT5G59770.1); Has 30201 Blast hits to 17322 proteins in 780 species: Archae - 12; Bacteria - 1396; Metazoa - 17338; Fungi - 3422; Plants - 5037; Viruses - 0; Other Eukaryotes - 2996 (source: NCBI …
AT5G04530	BnaC02g02670D	KCS19	ucqALA-C2-1	Fatty Acid Elongation	3-ketoacyl-CoA synthase 19 (KCS19); FUNCTIONS IN: transferase activity, transferring acyl groups other than amino-acyl groups, catalytic activity, acyltransferase activity; INVOLVED IN: response to cold, response to light stimulus, response to osmotic stress; LOCATED IN: endomembrane system, membrane; EXPRESSED IN: 17 plant structures; EXPRESSED DURING: 12 growth stages; CONTAINS InterPro DOMAIN/…
AT1G52760	BnaA06g01500D	ATMAGL3/CSE/LysoPL2	ucqALA-A6-1	TAG Degradation	lysophospholipase 2 (LysoPL2); BEST Arabidopsis thaliana protein match is: alpha/beta-Hydrolases superfamily protein (TAIR:AT1G11090.1); Has 2373 Blast hits to 2373 proteins in 808 species: Archae - 32; Bacteria - 1418; Metazoa - 106; Fungi - 99; Plants - 433; Viruses - 39; Other Eukaryotes - 246 (source: NCBI BLink).
	BnaC06g05630D		ucqFAS-C6
AT1G51440	BnaA06g02350D	DALL2	ucqALA-A6-1	TAG degradation	alpha/beta-Hydrolases superfamily protein; FUNCTIONS IN: galactolipase activity, triglyceride lipase activity, phospholipase A1 activity; INVOLVED IN: lipid metabolic process; LOCATED IN: chloroplast; EXPRESSED IN: 12 plant structures; EXPRESSED DURING: 4 anthesis, C globular stage, petal differentiation and expansion stage; CONTAINS InterPro DOMAIN/s: Lipase, class 3 (InterPro:IPR002921); BEST A…
AT1G73480	BnaA07g30890D	MAGL4	ucq-ALA-A7,ucqPA-A7-3	TAG Degradation	alpha/beta-Hydrolases superfamily protein; FUNCTIONS IN: hydrolase activity; EXPRESSED IN: 25 plant structures; EXPRESSED DURING: 15 growth stages; BEST Arabidopsis thaliana protein match is: alpha/beta-Hydrolases superfamily protein (TAIR:AT1G18360.1); Has 6390 Blast hits to 6380 proteins in 1730 species: Archae - 36; Bacteria - 4672; Metazoa - 140; Fungi - 153; Plants - 452; Viruses - 63; Other…
AT1G45201	BnaA08g04230D	ATTLL1/TLL1	ucqALA-A8-2,ucqOA-A8-2.ucqLA-A8-3	TAG Degradation	triacylglycerol lipase-like 1 (TLL1); FUNCTIONS IN: triglyceride lipase activity; INVOLVED IN: circadian rhythm, lipid metabolic process; LOCATED IN: vacuole, membrane; EXPRESSED IN: guard cell, leaf; CONTAINS InterPro DOMAIN/s: Lipase, class 3 (InterPro:IPR002921); BEST Arabidopsis thaliana protein match is: alpha/beta-Hydrolases superfamily protein (TAIR:AT5G42930.1); Has 1640 Blast hits to 163…
AT5G11650	BnaA10g20920D	MAGL13	ucqALA-A10-1	TAG Degradation	alpha/beta-Hydrolases superfamily protein; FUNCTIONS IN: hydrolase activity; LOCATED IN: chloroplast; EXPRESSED IN: 24 plant structures; EXPRESSED DURING: 15 growth stages; BEST Arabidopsis thaliana protein match is: alpha/beta-Hydrolases superfamily protein (TAIR:AT1G73480.1); Has 1807 Blast hits to 1807 proteins in 277 species: Archae - 0; Bacteria - 0; Metazoa - 736; Fungi - 347; Plants - 385;…
AT5G04040	BnaC02g02780D	SDP1	ucqALA-C2-1	TAG Degradation	SUGAR-DEPENDENT1 (SDP1); CONTAINS InterPro DOMAIN/s: Acyl transferase/acyl hydrolase/lysophospholipase (InterPro:IPR016035), Protein of unknown function DUF3336 (InterPro:IPR021771), ARF/SAR superfamily (InterPro:IPR006689), Patatin (InterPro:IPR002641); BEST Arabidopsis thaliana protein match is: sugar-dependent 1-like (TAIR:AT3G57140.2); Has 1807 Blast hits to 1807 proteins in 277 species: Arch…
AT5G18640	BnaC02g08280D	AT5G18640	ucqFAS-C2-3,ucqALA-C2-3	TAG Degradation	alpha/beta-Hydrolases superfamily protein; FUNCTIONS IN: triglyceride lipase activity; INVOLVED IN: lipid metabolic process; LOCATED IN: endomembrane system; EXPRESSED IN: 24 plant structures; EXPRESSED DURING: 14 growth stages; CONTAINS InterPro DOMAIN/s: Lipase, class 3 (InterPro:IPR002921); BEST Arabidopsis thaliana protein match is: alpha/beta-Hydrolases superfamily protein (TAIR:AT5G18630.2)…
AT4G16820	BnaC07g33970D	DALL1	ucqALA-C7-1	TAG degradation	alpha/beta-Hydrolases superfamily protein; FUNCTIONS IN: galactolipase activity, triglyceride lipase activity, phospholipase A1 activity; INVOLVED IN: lipid metabolic process; LOCATED IN: chloroplast; EXPRESSED IN: sperm cell, cultured cell; CONTAINS InterPro DOMAIN/s: Lipase, class 3 (InterPro:IPR002921); BEST Arabidopsis thaliana protein match is: alpha/beta-Hydrolases superfamily protein (TAIR…
AT3G05970	BnaC03g34500D	LACS6	ucqFAS-C3-1	β-Oxidation	long-chain acyl-CoA synthetase 6 (LACS6); FUNCTIONS IN: long-chain fatty acid-CoA ligase activity; INVOLVED IN: long-chain fatty acid metabolic process; LOCATED IN: membrane; EXPRESSED IN: 24 plant structures; EXPRESSED DURING: 16 growth stages; CONTAINS InterPro DOMAIN/s: AMP-binding, conserved site (InterPro:IPR020845), AMP-dependent synthetase/ligase (InterPro:IPR000873); BEST Arabidopsis thal…
	BnaC05g45860D		ucqLA-C5-5
AT3G06860	BnaC03g34950D	MFP2	ucqFAS-C3-1	β-Oxidation	multifunctional protein 2 (MFP2); FUNCTIONS IN: enoyl-CoA hydratase activity, 3-hydroxyacyl-CoA dehydrogenase activity; INVOLVED IN: fatty acid beta-oxidation; LOCATED IN: nucleolus, cell wall, peroxisome; EXPRESSED IN: 24 plant structures; EXPRESSED DURING: 14 growth stages; CONTAINS InterPro DOMAIN/s: Enoyl-CoA hydratase/isomerase, conserved site (InterPro:IPR018376), 3-hydroxyacyl-CoA dehydrog…
	BnaC05g45070D		ucqFAS-C5-2
AT4G29010	BnaA06g11400D	AIM1	ucqLA-A6-1	β-Oxidation	ABNORMAL INFLORESCENCE MERISTEM (AIM1); FUNCTIONS IN: enoyl-CoA hydratase activity; INVOLVED IN: multicellular organismal development, flower development, fatty acid beta-oxidation, seed germination; LOCATED IN: cell wall, peroxisome, chloroplast; EXPRESSED IN: 24 plant structures; EXPRESSED DURING: 13 growth stages; CONTAINS InterPro DOMAIN/s: Enoyl-CoA hydratase/isomerase, conserved site (Inter…
AT5G27600	BnaA06g28680D	LACS7	ucqLA-A6-4	β-Oxidation	long-chain acyl-CoA synthetase 7 (LACS7); FUNCTIONS IN: protein binding, long-chain fatty acid-CoA ligase activity; INVOLVED IN: response to salt stress, long-chain fatty acid metabolic process, response to ozone; LOCATED IN: peroxisome; EXPRESSED IN: 25 plant structures; EXPRESSED DURING: 15 growth stages; CONTAINS InterPro DOMAIN/s: AMP-binding, conserved site (InterPro:IPR020845), AMP-dependen…
AT4G14430	BnaA08g05310D	ECI2/IBR10	ucqALA-A8-2,ucqOA-A8-2.ucqLA-A8-3	β-Oxidation	indole-3-butyric acid response 10 (IBR10); FUNCTIONS IN: catalytic activity, dodecenoyl-CoA delta-isomerase activity; INVOLVED IN: fatty acid catabolic process, root hair elongation, metabolic process, indolebutyric acid metabolic process, response to indolebutyric acid stimulus; LOCATED IN: peroxisome; EXPRESSED IN: 24 plant structures; EXPRESSED DURING: 15 growth stages; CONTAINS InterPro DOMAI…
AT5G43280	BnaA09g16350D	DCI1	ucqALA-A9-5	β-Oxidation	delta(3,5),delta(2,4)-dienoyl-CoA isomerase 1 (DCI1); FUNCTIONS IN: enoyl-CoA hydratase activity, delta3,5-delta2,4-dienoyl-CoA isomerase activity; INVOLVED IN: fatty acid catabolic process, seed germination, metabolic process; LOCATED IN: peroxisome; EXPRESSED IN: 22 plant structures; EXPRESSED DURING: 13 growth stages; CONTAINS InterPro DOMAIN/s: Enoyl-CoA hydratase/isomerase, conserved site (I…
AT3G51840	BnaA09g32380D	ACX4	ucqLA-A9-4	β-Oxidation	acyl-CoA oxidase 4 (ACX4); FUNCTIONS IN: oxidoreductase activity, acyl-CoA oxidase activity; INVOLVED IN: fatty acid beta-oxidation, short-chain fatty acid metabolic process, embryo development ending in seed dormancy; LOCATED IN: peroxisome; EXPRESSED IN: 25 plant structures; EXPRESSED DURING: 15 growth stages; CONTAINS InterPro DOMAIN/s: Acyl-CoA oxidase/dehydrogenase, type1/2, C-terminal (Inte…
AT5G65110	BnaC09g06780D	ACX2	ucqALA-C9-2	β-Oxidation	acyl-CoA oxidase 2 (ACX2); CONTAINS InterPro DOMAIN/s: Acyl-CoA oxidase/dehydrogenase, type1/2, C-terminal (InterPro:IPR013764), Acyl-CoA oxidase/dehydrogenase, type 1 (InterPro:IPR006090), Acyl-CoA dehydrogenase/oxidase (InterPro:IPR009100), Acyl-CoA oxidase (InterPro:IPR012258), Acyl-CoA oxidase/dehydrogenase, central domain (InterPro:IPR006091), Acyl-CoA oxidase, C-terminal (InterPro:IPR002655…
AT3G20320	BnaC05g31720D	TGD2	ucqALA-C5-5	Lipid Trafficking	trigalactosyldiacylglycerol2 (TGD2); FUNCTIONS IN: phospholipid binding, lipid transporter activity; INVOLVED IN: lipid transport; LOCATED IN: chloroplast, chloroplast inner membrane, membrane, chloroplast envelope; EXPRESSED IN: 23 plant structures; EXPRESSED DURING: 13 growth stages; CONTAINS InterPro DOMAIN/s: Mammalian cell entry related (InterPro:IPR003399); Has 660 Blast hits to 610 protein…
AT1G65260	BnaC02g16490D	PTAC4	ucqFAS-C2-7,ucqALA-C2-4,ucqFAS-C2-3,ucqALA-C2-3	Lipid Trafficking	plastid transcriptionally active 4 (PTAC4); INVOLVED IN: vesicle organization, thylakoid membrane organization; LOCATED IN: in 8 components; EXPRESSED IN: 23 plant structures; EXPRESSED DURING: 15 growth stages; CONTAINS InterPro DOMAIN/s: PspA/IM30 (InterPro:IPR007157); Has 3123 Blast hits to 3108 proteins in 1139 species: Archae - 38; Bacteria - 2412; Metazoa - 160; Fungi - 68; Plants - 89; Vir…
