# Supplementary material for: Stable, Environmental Specific and Novel QTL Identification as Well as Genetic Dissection of Fatty Acid Metabolism in Brassica napus
Source: Front Plant Sci. 2018 Jul 17;9:1018. doi: 10.3389/fpls.2018.01018 (PMC6057442; doi:10.3389/fpls.2018.01018)
Supplement: Table S8 — The detected conditional consensus QTL for each FA composition in KN DH population. The writing format of PA|SA indicates that the trait of SA conditioned on the trait of SA for the QTL analysis, the others are the same meaning. [file Table_8.XLSX]

## Sheet: Table S8
Table S8 The revealed conditional consensus QTL for fatty acid traits in KN DH population.
Traits	Cconsensus QTL	Chromosome	Peak position	Confidence Interval	Lod Value	Additive effect	PV(R2;%)	Environments
PA	ccqPA|SA-A1	A01	56.91	53.8-58.5	2.56928	0.0663	7.2583	08DL
	ccqPA|SA-A3	A03	141.91	139.9-143.1	4.14036	0.0317	6.9908	12WH
	ccqPA|SA-A4	A04	35.51	27.3-38.5	2.69948	0.0473	7.204	08DL
	ccqPA|SA-A8	A08	16.11	11.8-17.6	2.70816	-0.0254	4.6285	12WH
	ccqPA|SA-C4	C04	100.11	98-101.7	2.72769	-0.0375	4.8702	13WH
	ccqPA|OA-A1	A01	8.01	4.5-10.3	2.90129	-1.5806	3.5833	13WH
	ccqPA|OA-A2	A02	89.81	87.8-93.8	2.5172	-3.0159	6.0694	08DL
	ccqPA|OA-A3-1	A03	45.01	44.4-45.5	2.71467	-1.584	3.3678	13WH
	ccqPA|OA-A3-2	A03	51.01	50.1-51.8	2.51286	-1.5088	3.128	13WH
	ccqPA|OA-A3-3	A03	89.81	89.4-90.5	5.84164	2.3877	8.9344	12WH
	ccqPA|OA-A3-4	A03	98.21	95.63-100.78	4.38-10.23	1.97-3.05	5.92-14.95	12WH/13WH
	ccqPA|OA-A3-5	A03	104.81	101-105	4.98015	2.0616	6.675	13WH
	ccqPA|OA-A3-6	A03	105.81	105-107.4	9.16608	2.8969	13.527	12WH
	ccqPA|OA-A5-1	A05	52.41	50.9-53.1	6.62718	2.4559	9.0507	13WH
	ccqPA|OA-A5-2	A05	57.81	57.4-59	6.52953	2.4549	8.9479	13WH
	ccqPA|OA-A6-1	A06	3.21	0-3.9	2.63655	-1.4395	3.2664	13WH
	ccqPA|OA-A6-2	A06	64.41	63.5-65.6	2.82751	-1.5331	3.5275	13WH
	ccqPA|OA-A7-1	A07	100.71	89.9-102.1	4.51794	1.9915	6.1861	12WH
	ccqPA|OA-A7-2	A07	108.33	106.63-110.03	2.76-4.02	1.49-1.92	3.41-5.57	12WH/13WH
	ccqPA|OA-A8-1	A08	18.21	17.1-21.1	4.03837	-1.8485	5.5496	12WH
	ccqPA|OA-A8-2	A08	27.71	25.6-30.7	4.46586	-1.964	6.1223	12WH
	ccqPA|OA-A8-3	A08	34.71	33.3-37.2	3.75193	-1.7769	5.1711	12WH
	ccqPA|OA-A8-4	A08	115.21	112.8-117.2	7.82719	-3.1303	14.4372	12WH
	ccqPA|OA-A9	A09	127.01	126.4-127.5	2.59532	-1.5021	3.3036	12WH
	ccqPA|OA-C1-1	C01	74.41	74.1-74.7	4.09913	-1.9278	5.4566	13WH
	ccqPA|OA-C1-2	C01	76.11	75.6-76.3	4.05356	-1.9376	5.3948	13WH
	ccqPA|OA-C1-3	C01	82.71	82.2-84.5	3.10093	-1.654	4.1686	13WH
	ccqPA|OA-C3-1	C03	60.61	51.2-63.4	3.50672	1.7893	4.7467	12WH
	ccqPA|OA-C3-2	C03	110.51	108.1-111.9	2.51937	1.41	3.1252	13WH
	ccqPA|OA-C3-3	C03	174.01	173.6-176.4	2.64523	-1.5369	3.5961	13WH
	ccqPA|OA-C3-4	C03	185.81	184.7-190.8	4.21197	-1.9994	5.6509	13WH
	ccqPA|OA-C3-5	C03	192.71	190.8-201.2	2.67778	-1.59	3.4283	12WH
	ccqPA|OA-C4-1	C04	98.01	89.2-98.7	2.86006	-1.4949	3.5661	13WH
	ccqPA|OA-C4-2	C04	101.81	100.1-115.7	3.36567	2.1656	8.9118	08DL
	ccqPA|OA-C4-3	C04	103.81	100.1-122.6	3.09225	-1.5952	4.1215	13WH
	ccqPA|OA-C5-1	C05	14.31	11.9-20.4	2.61919	-1.8352	4.7167	14WH
	ccqPA|OA-C5-2	C05	56.11	55.5-60.1	3.22028	1.6489	4.3939	13WH
	ccqPA|OA-C5-3	C05	70.31	69.7-72.8	4.09913	1.8614	5.5438	13WH
	ccqPA|OA-C7	C07	75.61	72.1-81.1	2.87525	-1.539	3.7829	13WH
	ccqPA|OA-C8	C08	39.41	37.2-46.7	2.92299	1.9663	5.2779	14WH
	ccqPA|LA-A1-1	A01	57.51	55.9-58	4.68286	-0.3786	7.615	12WH
	ccqPA|LA-A1-1	A01	62.21	61.6-62.9	4.32698	-0.3735	7.2756	12WH
	ccqPA|LA-A1-1	A01	68.61	67-70.2	2.67778	-0.2799	4.4253	12WH
	ccqPA|LA-A1-4	A01	73.81	71.8-77.4	2.64306	0.3049	7.2177	08DL
	ccqPA|LA-A7-1	A07	97.21	91.5-102.1	3.58701	0.2113	4.5409	13WH
	ccqPA|LA-A7-2	A07	106.91	106.4-109.2	4.86948	0.247	6.0977	13WH
	ccqPA|LA-A7-3	A07	114.51	114.2-115.7	4.58304	0.2374	5.8183	13WH
	ccqPA|LA-A8	A08	38.71	38.5-40.5	2.74071	-0.1953	4.8074	14WH
	ccqPA|LA-A9-1	A09	12.21	9.6-16.4	3.03366	-0.5025	8.5476	08DL
	ccqPA|LA-A9-2	A09	21.31	19.7-23.5	4.10347	-0.4491	10.4959	08DL
	ccqPA|LA-A9-3	A09	29.11	24.1-31.2	2.67778	-0.3605	6.9981	08DL
	ccqPA|LA-A9-4	A09	129.81	129.6-131.6	8.89266	0.3899	15.473	13WH
	ccqPA|LA-A9-5	A09	140.61	140-142.3	20.6107	0.593	30.6273	13WH
	ccqPA|LA-A9-6	A09	142.91	142.6-145.9	4.24018	0.3617	6.8291	12WH
	ccqPA|LA-A9-7	A09	152.71	152.1-153	4.00799	0.3503	6.5548	12WH
	ccqPA|LA-C2-1	C02	71.41	69.3-73.2	2.83185	0.2068	3.4702	13WH
	ccqPA|LA-C2-2	C02	79.51	77.7-82	2.53239	0.1911	3.1371	13WH
	ccqPA|LA-C3-1	C03	151.91	149.3-152	3.76495	0.5657	6.4029	12WH
	ccqPA|LA-C3-2	C03	164.31	163.2-172.9	2.96205	-0.395	4.8046	12WH
	ccqPA|LA-C3-3	C03	186.51	185.7-189.9	2.5172	-0.1704	2.9085	13WH
	ccqPA|LA-C4-1	C04	6.11	4.8-9.7	2.67127	-0.2068	3.0801	13WH
	ccqPA|LA-C4-2	C04	35.51	32.5-45.3	3.12697	0.2083	5.5026	14WH
	ccqPA|LA-C5	C05	138.51	130.1-143.6	4.25971	0.2481	5.3606	13WH
	ccqPA|LA-C6-1	C06	51.61	51.1-52.9	6.60331	-0.2984	8.5901	13WH
	ccqPA|LA-C6-2	C06	59.81	59-59.9	7.17402	-0.3394	9.3953	13WH
	ccqPA|LA-C6-3	C06	63.61	63.3-63.9	7.21525	-0.335	9.1536	13WH
	ccqPA|LA-C6-4	C06	67.51	66.8-68	6.21705	-0.3088	8.0344	13WH
	ccqPA|LA-C7	C07	42.01	39.4-42.9	3.74542	0.234	6.6748	14WH
	ccqPA|LA-C9	C09	23.91	20.9-26.7	3.16386	-0.3081	5.0345	12WH
	ccqPA|ALA-A1	A01	74.01	72-77.2	2.55192	0.2302	5.8314	08DL
	ccqPA|ALA-A2-1	A02	89.81	88.2-94.1	3.038	-0.2541	7.0789	08DL
	ccqPA|ALA-A2-2	A02	97.31	96.7-101	4.65682	-0.3138	10.5778	08DL
	ccqPA|ALA-A2-3	A02	103.21	102.3-104.8	4.91071	-0.3292	11.11	08DL
	ccqPA|ALA-A2-4	A02	109.11	107.5-110.3	4.86297	-0.3232	11.0157	08DL
	ccqPA|ALA-A4-1	A04	5.31	2.2-8.1	2.64089	0.3369	4.748	12WH
	ccqPA|ALA-A4-2	A04	10.41	8.7-11.3	3.12263	0.3718	5.5531	12WH
	ccqPA|ALA-A5-1	A05	12.91	12.5-14.1	5.62898	-0.3415	8.6101	13WH
	ccqPA|ALA-A5-2	A05	23.91	21.7-24.4	7.25865	-0.3865	10.9198	13WH
	ccqPA|ALA-A5-3	A05	33.91	33.6-35.8	5.74833	-0.3485	8.7793	13WH
	ccqPA|ALA-A7	A07	64.11	62.7-66	2.76024	-0.2939	4.8952	12WH
	ccqPA|ALA-A10	A10	38.11	36.7-39.2	2.62136	0.2694	6.2975	08DL
	ccqPA|ALA-C2-1	C02	45.31	44.7-46.3	3.29623	-0.3794	4.9969	13WH
	ccqPA|ALA-C2-2	C02	57.81	57.4-58.3	5.79824	0.404	9.682	13WH
	ccqPA|ALA-C2-3	C02	62.61	62.3-63	6.78993	0.5508	11.206	13WH
	ccqPA|ALA-C8-1	C08	106.51	102.7-109.4	2.60834	-0.3147	4.6805	12WH
	ccqPA|ALA-C8-2	C08	113.51	109.4-115.5	3.32444	-0.3902	5.9252	12WH
	ccqPA|EIA-A1-1	A01	21.29	17.65-24.93	2.63-7.13	0.39-0.53	3.34-10.44	12WH/13WH
	ccqPA|EIA-A1-2	A01	27.71	25.1-28.9	6.38197	0.4857	8.9576	13WH
	ccqPA|EIA-A1-3	A01	73.81	71.8-79	2.50201	0.3051	3.4598	13WH
	ccqPA|EIA-A1-4	A01	101.21	98.5-102.5	2.70599	0.3033	3.3989	13WH
	ccqPA|EIA-A2	A02	94.11	89.8-95.2	2.49984	0.3816	3.2069	12WH
	ccqPA|EIA-A5-1	A05	63.21	62.7-70.7	3.99931	-0.3655	4.9728	13WH
	ccqPA|EIA-A5-2	A05	71.11	70.7-77.7	2.9078	-0.3138	3.646	13WH
	ccqPA|EIA-A6-1	A06	64.41	63.8-65.2	4.58087	0.4018	6.2449	13WH
	ccqPA|EIA-A6-2	A06	114.71	112.2-123.2	2.54541	-0.3541	4.4962	14WH
	ccqPA|EIA-A7-1	A07	98.01	97.8-102.1	3.64994	-0.4661	4.9751	12WH
	ccqPA|EIA-A7-2	A07	108.31	106.2-109.8	3.84524	-0.4872	5.2385	12WH
	ccqPA|EIA-A7-3	A07	114.51	112.2-116	3.18339	-0.4384	4.3874	12WH
	ccqPA|EIA-A8-1	A08	2.01	0-7.6	2.61485	0.3598	4.2671	13WH
	ccqPA|EIA-A8-2	A08	18.21	16.4-21.1	2.55843	0.3841	3.4829	12WH
	ccqPA|EIA-A8-3	A08	19.91	18.2-21.4	3.51106	0.3384	4.3762	13WH
	ccqPA|EIA-A8-4	A08	27.62	26.26-28.97	3.22-4.56	0.39-0.43	4.36-5.64	12WH/13WH
	ccqPA|EIA-A8-5	A08	38.71	38.5-42.5	2.63221	0.2908	3.3111	13WH
	ccqPA|EIA-A8-6	A08	62.41	56.7-71.7	2.57145	-0.439	3.2659	12WH
	ccqPA|EIA-A9-1	A09	76.51	72-89.4	2.54324	-0.3727	3.2587	12WH
	ccqPA|EIA-A9-2	A09	127.01	123.4-128.1	3.906	0.5136	5.7038	12WH
	ccqPA|EIA-A9-3	A09	138.11	137.5-138.8	7.35196	0.6864	10.3147	12WH
	ccqPA|EIA-C2-1	C02	114.81	113.8-118	4.17074	0.3866	5.637	13WH
	ccqPA|EIA-C2-2	C02	120.11	119.1-122.1	3.08357	0.3315	4.2164	13WH
	ccqPA|EIA-C3-1	C03	28.61	25.7-30.7	3.94506	-0.8963	9.9489	08DL
	ccqPA|EIA-C3-2	C03	33.71	30.7-39.1	2.98375	-0.7484	7.6499	08DL
	ccqPA|EIA-C3-3	C03	110.51	108.1-111.9	3.08357	-0.327	3.8715	13WH
	ccqPA|EIA-C3-4	C03	122.31	118.3-123.5	6.08685	-0.6004	8.4916	12WH
	ccqPA|EIA-C3-5	C03	132.11	130.4-132.8	4.98015	-0.545	7.0695	12WH
	ccqPA|EIA-C3-6	C03	147.01	146.3-149.1	3.48936	0.5728	4.387	12WH
	ccqPA|EIA-C3-7	C03	176.12	176.12-175.04	2.57-6.07	0.31-0.63	3.57-8.46	12WH/13WH
	ccqPA|EIA-C3-8	C03	185.4	183.67-187.13	4.16-5.03	0.41-0.57	5.67-7.10	12WH/13WH
	ccqPA|EIA-C5-1	C05	58.91	49.2-60.1	4.35519	-0.3987	6.0908	13WH
	ccqPA|EIA-C5-2	C05	65.21	64.9-66.5	5.62464	-0.4489	7.7403	13WH
	ccqPA|EIA-C5-3	C05	70.31	69.7-72.8	4.43982	-0.4012	6.1767	13WH
	ccqPA|EIA-C7-1	C07	61.41	57.2-63.6	2.84704	0.3048	3.5747	13WH
	ccqPA|EIA-C7-2	C07	71.61	68.4-79.2	3.5154	0.3361	4.3782	13WH
	ccqPA|EIA-C8	C08	44.11	37.2-46.5	2.80147	-0.382	4.96	14WH
	ccqPA|EA-A2	A02	89.81	87.8-94.1	2.65391	2.6389	6.703	08DL
	ccqPA|EA-A3-1	A03	89.81	88.7-90.5	6.24526	-1.7917	9.0763	12WH
	ccqPA|EA-A3-2	A03	98.21	95.5-101	9.44167	-2.1421	13.2971	12WH
	ccqPA|EA-A5	A05	63.51	63.2-70.7	2.58013	-1.1417	3.1408	13WH
	ccqPA|EA-A6	A06	67.11	66.6-68	6.2496	1.8051	8.3809	13WH
	ccqPA|EA-A7-1	A07	100.71	89.9-102.1	5.3599	-1.6006	7.1932	12WH
	ccqPA|EA-A7-2	A07	116.11	114.7-118.2	5.80475	-1.788	7.739	13WH
	ccqPA|EA-A8-1	A08	19.91	19.3-21.1	4.89335	1.5008	6.5968	12WH
	ccqPA|EA-A8-2	A08	27.71	24.1-30.7	5.29046	1.5777	7.1158	12WH
	ccqPA|EA-A8-3	A08	37.61	37.2-38.4	3.038	1.1969	4.1849	12WH
	ccqPA|EA-A8-4	A08	115.21	112.9-117.2	7.77945	2.3012	14.0598	12WH
	ccqPA|EA-A9	A09	127.01	125.8-127.5	2.85355	1.1546	3.5206	12WH
	ccqPA|EA-C3-1	C03	61.01	55.5-63.4	4.25103	-1.4667	5.6369	12WH
	ccqPA|EA-C3-2	C03	69.01	67.3-69.2	3.15301	-1.268	4.2315	12WH
	ccqPA|EA-C3-3	C03	174.01	173.6-176.4	5.64634	1.7832	7.9259	13WH
	ccqPA|EA-C3-4	C03	185.81	185-186.5	7.8771	2.1564	10.8612	13WH
	ccqPA|EA-C3-5	C03	192.17	189.72-195.69	3.39-7.98	1.30-2.19	4.16-11.12	12WH/13WH
	ccqPA|EA-C4	C04	101.81	100.1-118.7	3.10093	-1.6591	7.6739	08DL
	ccqPA|EA-C5-1	C05	14.31	11.9-21.5	3.31793	1.5108	5.8674	14WH
	ccqPA|EA-C5-2	C05	71.21	69.7-72.5	5.48359	-1.6837	7.2438	13WH
	ccqPA|EA-C7-1	C07	63.61	61.7-65.7	2.81449	1.2116	3.7156	13WH
	ccqPA|EA-C7-2	C07	73.61	69.5-79.2	3.8192	1.3974	4.978	13WH
SA	ccqSA|PA-A1-1	A01	63.51	63-65.6	2.94469	-0.1022	5.1474	14WH
	ccqSA|PA-A1-2	A01	74.01	72-77.5	3.48936	-0.0543	8.7709	08DL
	ccqSA|PA-A1-3	A01	83.41	80.9-84.1	2.50852	-0.0482	6.2632	08DL
	ccqSA|PA-A3-1	A03	90.31	89.4-91.8	3.97978	-0.0957	5.0474	13WH
	ccqSA|PA-A3-2	A03	98.21	94.8-101	4.88467	-0.1057	6.1345	13WH
	ccqSA|PA-A3-3	A03	103.61	101-105	4.09045	-0.0963	5.1781	13WH
	ccqSA|PA-A3-4	A03	141.91	139.4-142.2	4.15772	-0.081	5.7244	12WH
	ccqSA|PA-A6-1	A06	89.71	87.2-90.9	2.6691	0.0948	4.7193	14WH
	ccqSA|PA-A6-2	A06	98.11	93.4-99.7	3.45898	0.1078	6.0723	14WH
	ccqSA|PA-A7-1	A07	15.51	15.1-15.9	3.87128	-0.2133	6.887	14WH
	ccqSA|PA-A7-2	A07	111.21	108.8-111.6	3.84524	-0.0972	4.7851	13WH
	ccqSA|PA-A8-1	A08	11.61	10.7-14.1	7.16534	-0.1351	10.4674	13WH
	ccqSA|PA-A8-2	A08	25.91	23.6-27.7	5.43585	-0.0924	7.4627	12WH
	ccqSA|PA-A8-3	A08	29.81	28.8-30.7	9.765	-0.1536	13.974	13WH
	ccqSA|PA-A8-4	A08	116.21	105.3-117.2	2.74939	0.0752	4.4447	12WH
	ccqSA|PA-C2	C02	86.61	85.2-88.8	2.61268	-0.0752	3.2671	13WH
	ccqSA|PA-C3-1	C03	64.21	62.5-64.4	2.68646	0.0566	6.6341	08DL
	ccqSA|PA-C3-2	C03	176.01	173.5-176.4	6.63152	-0.107	9.312	12WH
	ccqSA|PA-C3-3	C03	183.21	182.9-184.1	6.82031	-0.1092	9.512	12WH
	ccqSA|PA-C3-4	C03	184.41	184.1-184.7	8.95125	-0.1494	11.6833	13WH
	ccqSA|PA-C3-5	C03	190.91	190.8-196.9	5.94363	-0.1237	8.0022	13WH
	ccqSA|OA-A1	A01	42.71	41.7-43.2	3.32444	-2.3381	5.7503	14WH
	ccqSA|OA-A6	A06	98.11	93.4-99.7	3.24849	2.2785	5.6105	14WH
	ccqSA|OA-A8-1	A08	18.21	17.13-19.28	7.36-7.72	-3.31--3.20	10.43-10.64	12WH/13WH
	ccqSA|OA-A8-2	A08	25.91	24.66-27.15	8.54-9.96	-3.84--3.39	10.43-14.02	12WH-13WH
	ccqSA|OA-A8-3	A08	32.91	31.6-33.6	6.99391	-3.2118	10.155	12WH
	ccqSA|OA-A9	A09	12.41	10.2-17.9	2.71033	-1.9373	3.4335	13WH
	ccqSA|OA-C2-1	C02	42.91	41-45.3	4.03837	-1.9224	10.475	08DL
	ccqSA|OA-C2-2	C02	118.01	115.4-119.1	4.16206	-2.4119	5.5079	12WH
	ccqSA|OA-C3-1	C03	179.01	178.4-180.7	12.9115	-4.3466	18.1282	13WH
	ccqSA|OA-C3-2	C03	185.71	184.9-188.1	8.50423	-3.5507	11.6268	12WH
	ccqSA|OA-C3-3	C03	192.71	190.8-199.3	5.44236	-2.9421	7.7233	12WH
	ccqSA|OA-C5-1	C05	34.31	30.6-39	4.41161	2.3837	5.6476	13WH
	ccqSA|OA-C5-2	C05	43.91	39.9-44.3	3.37218	2.0725	4.3723	13WH
	ccqSA|OA-C5-3	C05	68.61	68.5-68.8	5.0995	4.0351	7.103	12WH
	ccqSA|LA-A3-1	A03	98.21	96.8-101	5.21668	-0.639	6.433	13WH
	ccqSA|LA-A3-2	A03	109.21	108-109.4	6.02826	-0.664	7.3454	13WH
	ccqSA|LA-A3-3	A03	135.61	134.9-136.8	2.49767	-0.3804	3.3755	12WH
	ccqSA|LA-A3-4	A03	143.11	139.8-144	4.62861	-0.5109	6.1172	12WH
	ccqSA|LA-A5	A05	62.11	61.7-62.5	5.1212	-0.5858	11.8926	08DL
	ccqSA|LA-A6-1	A06	70.21	69.1-73.1	3.15518	0.4755	3.772	13WH
	ccqSA|LA-A6-2	A06	79.41	77.5-80.3	3.74976	0.517	4.4727	13WH
	ccqSA|LA-A8-1	A08	21.41	19.87-22.94	5.68-8.05	-0.80--0.56	7.64-10.52	12WH-13WH
	ccqSA|LA-A8-2	A08	28.13	27.54-28.72	6.54-10.46	-0.91--0.60	8.72-13.55	12WH/13WH
	ccqSA|LA-8-3	A08	32.31	31.7-33.6	5.27527	-0.5364	7.1694	12WH
	ccqSA|LA-A8-4	A08	38.71	38.5-39.1	8.3762	-0.8038	10.9162	13WH
	ccqSA|LA-A9-1	A09	131.61	130.7-132.7	4.04488	0.472	5.2704	12WH
	ccqSA|LA-A9-2	A09	134.91	134.5-135.6	2.52588	0.4406	3.1114	13WH
	ccqSA|LA-A9-3	A09	142.81	142.6-145.2	3.46332	0.4473	4.5662	12WH
	ccqSA|LA-A9-4	A09	145.51	142.9-145.9	4.68069	0.5989	5.6243	13WH
	ccqSA|LA-A9-5	A09	155.01	152.7-155.1	3.20075	0.5021	3.9105	13WH
	ccqSA|LA-C3-1	C03	176.01	175.14-176.87	5.27-8.83	-0.87--0.55	7.11-12.03	12WH/13WH
	ccqSA|LA-C3-2	C03	183.21	182.9-183.5	12.024	-1.0075	15.6271	13WH
	ccqSA|LA-C3-3	C03	186.51	184.7-188.6	5.65068	-0.5651	7.4528	12WH
	ccqSA|LA-C3-4	C03	191	189.88-192.12	2.59-8.81	-0.88--0.40	3.60-11.83	12WH/13WH
	ccqSA|LA-C5-1	C05	140.51	128.7-143.9	3.70202	0.5084	5.4116	12WH
	ccqSA|LA-C5-2	C05	149.91	143.9-159.9	3.21811	0.4874	5.7174	12WH
	ccqSA|LA-C6	C06	79.81	78.1-81.8	3.038	-0.5069	6.8567	08DL
	ccqSA|LA-C9	C09	51.11	43.4-54.1	3.05536	-0.3619	6.8927	08DL
	ccqSA|ALA-A3-1	A03	32.71	31.3-33.4	2.81232	0.2453	6.6032	08DL
	ccqSA|ALA-A3-2	A03	92.41	90.8-92.7	3.31576	-0.2204	4.1034	13WH
	ccqSA|ALA-A3-3	A03	109.21	106.5-111.1	3.20943	-0.2149	3.9758	13WH
	ccqSA|ALA-A5-1	A05	12.91	12.5-14.5	4.03837	-0.255	5.7542	13WH
	ccqSA|ALA-A5-2	A05	18.01	11.7-19.4	2.82968	-0.1441	3.4231	12WH
	ccqSA|ALA-A5-3	A05	23.91	22.8-24.4	7.07203	-0.3326	9.7728	13WH
	ccqSA|ALA-A5-4	A05	32.58	31.31-33.84	2.73-4.74	-0.28--0.14	3.31-6.71	12WH/13WH
	ccqSA|ALA-A5-5	A05	54.61	53.6-59.9	2.87308	-0.1435	3.4736	12WH
	ccqSA|ALA-A6-1	A06	51.21	48.9-52.3	3.2116	0.232	7.5373	08DL
	ccqSA|ALA-A6-2	A06	59.81	58.3-62	3.07706	0.2279	7.2399	08DL
	ccqSA|ALA-A8-1	A08	11.61	3.3-15.3	5.17111	-0.1993	7.283	12WH
	ccqSA|ALA-A8-2	A08	19.91	18.1-21.4	3.78448	-0.2463	5.2771	13WH
	ccqSA|ALA-A8-3	A08	21.41	19.3-24	2.81232	-0.1451	3.7784	12WH
	ccqSA|ALA-A8-4	A08	28.81	27.7-31	5.91542	-0.309	8.269	13WH
	ccqSA|ALA-A8-5	A08	38.71	38.5-40.4	5.62464	-0.2957	7.6912	13WH
	ccqSA|ALA-A9	A09	122.31	119.3-127.9	3.75193	-0.1636	4.8766	12WH
	ccqSA|ALA-A10-1	A10	64.71	60-67.1	4.58087	-0.1887	6.2095	12WH
	ccqSA|ALA-A10-2	A10	71.51	67.1-71.7	5.77654	-0.2183	7.8881	12WH
	ccqSA|ALA-C2-1	C02	39.01	38-41	3.50238	-0.2029	4.501	12WH
	ccqSA|ALA-C2-2	C02	44.41	41.4-44.9	4.27924	-0.2502	5.4925	12WH
	ccqSA|ALA-C2-3	C02	57.81	57.3-58.9	3.00762	0.1618	3.8895	12WH
	ccqSA|ALA-C3-1	C03	18.41	16.8-21.3	2.59098	-0.1363	3.1427	12WH
	ccqSA|ALA-C3-2	C03	47.91	43-57.1	3.25934	0.2263	7.6049	08DL
	ccqSA|ALA-C3-3	C03	143.61	141.6-146.3	2.61485	0.2063	6.0769	08DL
	ccqSA|ALA-C3-4	C03	178.61	176.4-179.1	3.76278	-0.2483	5.1752	13WH
	ccqSA|ALA-C3-5	C03	185.81	184.7-189.9	4.991	-0.2924	6.7745	13WH
	ccqSA|ALA-C4	C04	34.61	32.5-45.9	2.53022	0.1878	4.472	14WH
	ccqSA|ALA-C7-1	C07	63.61	61.8-64.1	3.14216	0.2292	4.4193	13WH
	ccqSA|ALA-C7-2	C07	72.61	69.1-79.1	5.67889	0.3016	7.7298	13WH
	ccqSA|ALA-C8-1	C08	95.61	90.2-97.3	3.12914	-0.2282	4.184	13WH
	ccqSA|ALA-C8-2	C08	100.31	98.7-100.9	3.41992	-0.2393	4.5757	13WH
	ccqSA|ALA-C8-3	C08	105.91	104.8-111	3.35482	-0.246	4.4913	13WH
	ccqSA|ALA-C9-1	C09	6.01	2-8.1	8.46083	-0.2931	13.2287	12WH
	ccqSA|ALA-C9-2	C09	11.01	10.1-11.7	9.50894	-0.2935	13.1898	12WH
	ccqSA|ALA-C9-3	C09	20.31	19.4-20.9	8.77114	-0.2718	12.2999	12WH
	ccqSA|EIA-A1-1	A01	26.31	25.1-27.7	2.604	0.6824	6.4042	08DL
	ccqSA|EIA-A1-2	A01	34.51	27.7-36.2	2.67344	0.6813	6.6192	08DL
	ccqSA|EIA-A1-3	A01	62.91	62.2-63.2	3.75844	0.8117	6.4814	14WH
	ccqSA|EIA-A1-4	A01	68.61	67.8-70.5	3.09442	0.7024	5.4056	14WH
	ccqSA|EIA-A6-1	A06	89.71	87.5-90.9	4.29443	-0.9864	7.7207	14WH
	ccqSA|EIA-A6-2	A06	98.11	95.9-99.1	6.26913	-1.0986	11.0401	14WH
	ccqSA|EIA-A6-3	A06	107.61	105.5-108.7	3.04017	-0.7417	5.5238	14WH
	ccqSA|EIA-A7-1	A07	41.61	40.4-44.8	4.35953	1.0411	10.5991	08DL
	ccqSA|EIA-A7-2	A07	53.51	53.1-54.4	3.20509	0.8069	7.9709	08DL
	ccqSA|EIA-A8-1	A08	9.61	8.4-16.1	6.41669	0.8779	9.5054	13WH
	ccqSA|EIA-A8-2	A08	18.21	17.3-19.9	8.4847	0.9491	11.6275	12WH
	ccqSA|EIA-A8-3	A08	28.11	27.68-28.53	9.05-9.19	0.97--0.99	11.82-12.33	12WH/13WH
	ccqSA|EIA-A8-4	A08	34.61	33.3-35.1	6.79644	0.856	9.5023	12WH
	ccqSA|EIA-C2	C02	118.01	115.7-119.1	4.5136	0.676	5.8573	12WH
	ccqSA|EIA-C3-1	C03	28.61	21.6-30.7	2.71033	-0.7411	6.655	08DL
	ccqSA|EIA-C3-2	C03	179.01	177.7-179.9	13.378	1.2536	18.331	13WH
	ccqSA|EIA-C3-3	C03	183.61	183.5-184.1	13.6493	1.2642	18.6554	13WH
	ccqSA|EIA-C3-4	C03	185.71	185-189.3	7.84238	0.9357	10.5395	12WH
	ccqSA|EIA-C3-5	C03	189.91	189.8-192.7	2.55626	0.6683	4.5445	14WH
	ccqSA|EIA-C3-6	C03	194.71	190.8-200.7	5.50529	0.8526	8.5911	12WH
	ccqSA|EIA-C5	C05	34.31	29.1-41.4	2.63872	-0.503	3.2186	13WH
	ccqSA|EIA-C7	C07	47.21	44.4-49.6	2.74505	0.5334	3.5037	12WH
	ccqSA|EA-A1-1	A01	60.01	59.2-61.2	3.11829	2.1648	5.3249	14WH
	ccqSA|EA-A1-2	A01	67.01	64.2-67.8	3.49153	2.2379	5.9652	14WH
	ccqSA|EA-A3	A03	143.11	142.2-144.6	3.25717	1.8814	4.2942	12WH
	ccqSA|EA-A6-1	A06	89.71	87.5-90.1	4.75013	-3.1502	8.6984	14WH
	ccqSA|EA-A6-2	A06	98.11	97.2-99.1	7.47999	-3.648	13.3021	14WH
	ccqSA|EA-A6-3	A06	107.61	106.9-108	3.81269	-2.5304	7.0241	14WH
	ccqSA|EA-A8-1	A08	18.21	16.8-19.9	7.62104	2.7304	10.6837	12WH
	ccqSA|EA-A8-2	A08	25.91	24.77-27.04	8.94-10.09	3.13-3.26	11.88-13.78	12WH/13WH
	ccqSA|EA-A8-3	A08	31.9	31.25-32.55	6.55-9.90	2.54-3.36	9.33-13.06	12WH/13WH
	ccqSA|EA-A10-1	A10	1.21	0.8-2.4	4.25971	1.6233	10.7227	08DL
	ccqSA|EA-A10-2	A10	9.31	8.1-10.2	2.74505	1.3758	7.0791	08DL
	ccqSA|EA-C2-1	C02	42.91	40.4-45.3	2.63655	1.2785	6.4481	08DL
	ccqSA|EA-C2-2	C02	118.01	115.7-120.1	3.73023	1.8414	4.7798	12WH
	ccqSA|EA-C3-1	C03	179.01	176.4-180.7	6.13242	2.5418	8.1365	12WH
	ccqSA|EA-C3-2	C03	182.81	182.5-182.9	15.1097	4.3977	21.1051	13WH
	ccqSA|EA-C3-3	C03	183.21	182.9-184.1	6.73134	2.6449	8.8673	12WH
	ccqSA|EA-C3-4	C03	185.81	185.2-188.2	7.24997	2.7491	9.5005	12WH
	ccqSA|EA-C3-5	C03	191.87	188.21-195.52	3.88-9.57	2.07-3.65	5.30-14.14	12WH/13WH
	ccqSA|EA-C6	C06	79.81	78.3-81.8	2.55192	1.6984	6.2603	08DL
	ccqSA|EA-C8	C08	3.91	0-6.7	3.3418	1.6916	3.9604	12WH
OA	ccqOA|PA-A1-1	A01	8.01	5.5-10.8	2.50201	0.0494	3.0626	12WH
	ccqOA|PA-A1-2	A01	19.31	11.7-22.4	4.7306	0.078	6.7941	13WH
	ccqOA|PA-A1-3	A01	32.91	30-33	3.32661	0.0624	4.561	13WH
	ccqOA|PA-A1-4	A01	74.01	72.3-76.6	3.67381	0.059	4.921	12WH
	ccqOA|PA-A3-1	A03	89.81	89.2-90.5	6.08685	-0.0799	8.4827	12WH
	ccqOA|PA-A3-2	A03	98.21	93.8-101	7.70784	-0.0874	10.574	12WH
	ccqOA|PA-A3-3	A03	105.91	104.8-107.4	5.78522	-0.0749	8.0883	12WH
	ccqOA|PA-A5	A05	71.11	67.1-77.7	2.68429	-0.0488	3.2785	12WH
	ccqOA|PA-A6-1	A06	55.11	54.7-55.4	3.69334	0.0682	5.3358	13WH
	ccqOA|PA-A6-2	A06	64.41	63.9-65.5	7.37366	0.0931	10.2685	13WH
	ccqOA|PA-A7-1	A07	97.21	91.7-98	8.16354	-0.0886	11.2316	12WH
	ccqOA|PA-A7-2	A07	106.91	106.5-108	6.57076	-0.0825	9.2333	12WH
	ccqOA|PA-A7-3	A07	115.51	113.9-120.3	3.13348	-0.0624	4.3392	13WH
	ccqOA|PA-A8-1	A08	15.11	7.4-17.6	3.24632	-0.0658	4.9671	13WH
	ccqOA|PA-A8-2	A08	21.41	19.9-24.1	3.97327	-0.0674	5.3215	13WH
	ccqOA|PA-A8-3	A08	28.11	27.6-30.7	3.22245	-0.0611	4.3511	13WH
	ccqOA|PA-A8-4	A08	116.21	111.4-117.2	3.17688	0.0623	5.0819	12WH
	ccqOA|PA-A9-1	A09	127.01	126.1-127.5	5.52916	0.0741	7.4046	12WH
	ccqOA|PA-A9-2	A09	131.61	130.8-132.7	5.68106	0.0731	7.5818	12WH
	ccqOA|PA-A9-3	A09	136.71	135.6-136.8	5.47274	0.0735	7.3457	12WH
	ccqOA|PA-C3	C03	81.11	78.7-90.1	2.9729	-0.0578	3.6992	13WH
	ccqOA|PA-C4-1	C04	97.01	90.3-99.2	3.12914	0.0512	3.8855	12WH
	ccqOA|PA-C4-2	C04	101.71	100.1-118.6	4.19461	0.069	5.6499	13WH
	ccqOA|PA-C5-1	C05	7.81	3.5-11.9	2.72552	0.0738	5.1755	14WH
	ccqOA|PA-C5-2	C05	16.31	11.9-20.4	2.90563	0.0728	5.15	14WH
	ccqOA|PA-C5-3	C05	64.51	60.1-64.9	6.1411	-0.0844	8.4867	13WH
	ccqOA|PA-C5-4	C05	68.61	67.8-68.8	3.90166	-0.0632	5.2234	12WH
	ccqOA|PA-C5-5	C05	70.31	69.4-72.2	6.49698	-0.0867	8.9449	13WH
	ccqOA|PA-C5-6	C05	80.11	79.5-80.7	5.39245	-0.0795	7.5117	13WH
	ccqOA|PA-C8	C08	36.51	24.4-46.4	3.06621	-0.074	5.3124	14WH
	ccqOA|SA-A5-1	A05	36.61	34-37.1	2.82751	-0.0261	4.7221	12WH
	ccqOA|SA-A5-2	A05	44.71	41.5-45.6	3.21377	-0.0276	5.3391	12WH
	ccqOA|SA-A6	A06	98.11	97.6-100.4	5.52048	-0.0313	9.4394	14WH
	ccqOA|SA-C1	C01	47.11	45-47.9	2.95337	0.0352	7.7733	08DL
	ccqOA|SA-C2-1	C02	112.21	109-112.5	4.19244	0.0335	7.6528	12WH
	ccqOA|SA-C2-2	C02	118.01	116-119	7.12411	0.0421	12.4038	12WH
	ccqOA|SA-C3	C03	93.91	91.6-98.9	2.82317	0.0241	4.6177	13WH
	ccqOA|SA-C5	C05	34.81	27.2-38.1	3.689	-0.0279	6.0867	13WH
	ccqOA|SA-C9	C09	63.81	61.4-64.7	3.37435	0.0261	5.5539	13WH
	ccqOA|LA-A1-1	A01	8.01	4.5-10.8	2.9512	0.3868	3.7511	13WH
	ccqOA|LA-A1-2	A01	26.71	25.5-29.3	5.72663	0.4726	8.787	11HG
	ccqOA|LA-A2-1	A02	40.11	39.1-41.1	2.54758	0.2635	3.4529	13DL
	ccqOA|LA-A2-2	A02	41.91	41.38-42.43	2.72-6.38	0.31-0.68	3.55-14.90	10DL/11DL/11GS
	ccqOA|LA-A2-3	A02	43.61	43.2-44.7	5.80475	0.4127	7.5871	12DL
	ccqOA|LA-A2-4	A02	49.34	48.23-50.46	3.26-8.84	0.34-0.84	4.23-21.87	10DL/11DL/12DL/13DL/11GS
	ccqOA|LA-A2-5	A02	56.46	55.58-57.35	6.07-7.36	0.47-0.73	9.47-14.05	12DL/11GS
	ccqOA|LA-A2-6	A02	66.51	65.6-68	3.2767	0.6663	10.872	10GS
	ccqOA|LA-A3-1	A03	86.21	84.6-87.2	4.39425	-0.3742	5.7249	12DL
	ccqOA|LA-A3-2	A03	94.63	92.79-96.48	3.69-6.80	-0.45--0.32	4.94-8.62	09DL/12DL
	ccqOA|LA-A3-3	A03	98.21	96.8-101	3.1682	-0.4062	4.3479	13WH
	ccqOA|LA-A3-4	A03	102.97	102.34-103.59	3.17-5.19	-0.46--0.30	41.4-7.28	09DL/13DL/12WH
	ccqOA|LA-A3-5	A03	111.36	110.07-112.66	3.75-6.40	-0.50--0.34	5.15-8.85	13DL/12WH/13WH
	ccqOA|LA-A3-6	A03	116.51	115.8-116.9	4.27707	-0.4024	6.0127	11DL
	ccqOA|LA-A3-7	A03	139.11	136.8-141.9	2.9078	-0.4421	4.3911	11WH
	ccqOA|LA-A4-1	A04	2.01	0-3.8	3.87996	0.438	5.6766	10DL
	ccqOA|LA-A4-2	A04	60.11	59.5-63.3	2.59966	0.2635	3.1984	09DL
	ccqOA|LA-A5-1	A05	19.4	18.51-20.3	3.61088-5	-0.37--0.31	4.72-6.70	09DL/13DL
	ccqOA|LA-A5-2	A05	22.51	21.6-23.41	4.39-4.42	-0.41--0.37	6.21-6.37	10DL/11DL
	ccqOA|LA-A5-3	A05	27.61	25.22-29.99	3.32-3.86	-0.32--0.29	3.79-5	12DL/13DL
	ccqOA|LA-A5-4	A05	33.9	33.7-34.1	3.04-3.40	-0.34--0.33	4.33-5	10DL/11DL
	ccqOA|LA-A5-5	A05	42.61	40.2-44.7	2.83836	-0.3147	3.5475	12WH
	ccqOA|LA-A6-1	A06	49.81	48.4-50.1	5.53133	0.4581	8.4695	11HG
	ccqOA|LA-A6-2	A06	52.71	52.28-53.13	3.72-4.36	0.39-0.49	5.08-6.23	12WH/13WH
	ccqOA|LA-A6-3	A06	62.77	62.23-63.31	4.3-6.3	0.41-0.58	5.89-8.97	12WH/13WH/11HG
	ccqOA|LA-A6-4	A06	67.11	66.6-68.4	5.36424	0.5268	7.6476	13WH
	ccqOA|LA-A6-5	A06	93.41	90.9-97.1	2.58664	-0.3373	3.2399	12WH
	ccqOA|LA-A7-1	A07	48.91	48-50.9	3.28104	-0.4894	5.0516	11WH
	ccqOA|LA-A7-2	A07	68.11	66.1-70.1	3.14867	-0.2881	3.7575	13DL
	ccqOA|LA-A8-1	A08	13.61	7.6-17.6	3.00328	-0.3336	4.0233	11DL
	ccqOA|LA-A8-2	A08	14.11	3.9-17.6	2.62136	-0.2598	3.2356	09DL
	ccqOA|LA-A8-3	A08	21.41	17.8-24.1	3.69117	-0.3628	4.7593	11DL
	ccqOA|LA-A8-4	A08	28.11	26.79-29.42	3.53-3.92	-0.64--0.30	4.31-13.93	09DL/10GS
	ccqOA|LA-A8-5	A08	28.81	27.6-31.6	2.87525	-0.3212	3.756	11DL
	ccqOA|LA-A8-6	A08	32.91	32-34.6	4.67201	-0.6592	16.2236	10GS
	ccqOA|LA-A8-7	A08	40.71	38.7-42.5	3.13348	-0.5325	11.3614	10GS
	ccqOA|LA-A8-8	A08	107.51	104.9-111.2	2.6474	0.27	3.1979	13DL
	ccqOA|LA-A8-9	A08	115.21	111.2-117.2	2.50201	0.2968	3.8926	13DL
	ccqOA|LA-A9-1	A09	17.91	13.6-19	3.66079	-0.3791	5.5076	11HG
	ccqOA|LA-A9-2	A09	38.31	31.2-44.6	3.33963	-0.3065	4.3719	13DL
	ccqOA|LA-A9-3	A09	50.41	49.3-52.2	3.54144	-0.3053	4.207	13DL
	ccqOA|LA-A9-4	A09	58.61	56.5-67	4.00799	-0.3244	4.7371	13DL
	ccqOA|LA-A9-5	A09	61.01	60-65.1	3.04451	-0.3072	4.3512	09DL
	ccqOA|LA-A9-6	A09	72.02	71.13-72.9	3.59-7.32	-0.47--0.31	4.09-10.02	069DL/12DL/13DL
	ccqOA|LA-A9-7	A09	81.61	78.29-84.92	3.56-5.50	-0.43--0.32	4.86-8.88	09DL/13DL
	ccqOA|LA-A9-8	A09	86.91	77.6-89.8	2.63438	-0.2842	3.5566	10DL
	ccqOA|LA-A9-9	A09	115.21	111.4-117.1	2.50852	0.2676	3.0893	09DL
	ccqOA|LA-A9-10	A09	127.01	126.19-127.82	3.49-7.42	0.31-0.55	4.26-10.65	09DL/12WH
	ccqOA|LA-A9-11	A09	129.61	129.1-129.8	5.05393	0.5214	7.3885	13WH
	ccqOA|LA-A9-12	A09	134.84	134.21-135.47	3.52-8.46	0.48-0.59	7.14-12	12WH/11GS
	ccqOA|LA-A9-13	A09	137.93	137.19-138.68	2.67-7.69	0.27-0.64	3.24-10.94	13DL/11WH/13WH
	ccqOA|LA-A9-14	A09	139.51	139.2-139.8	3.36784	0.4711	6.8581	11GS
	ccqOA|LA-A9-15	A09	142.11	139.9-142.6	8.05721	0.5748	11.4565	12WH
	ccqOA|LA-A9-16	A09	146.74	145.88-147.61	2.84-6.07	0.45-0.57	4.45-8.75	11WH/13WH
	ccqOA|LA-A10	A10	20.41	19.2-21.2	2.56277	0.3801	3.6922	11HG
	ccqOA|LA-C1	C01	82.71	82.5-84.7	3.63041	-0.4135	6.2864	14YL
	ccqOA|LA-C2-1	C02	59.21	58.74-59.67	2.52-3.87	-0.38--0.30	3.41-5.42	10DL/12DL
	ccqOA|LA-C2-2	C02	63.21	62.9-64.1	5.41849	-0.4347	7.4921	12DL
	ccqOA|LA-C2-3	C02	87.51	85.6-90.3	2.68429	-0.3081	3.8174	11HG
	ccqOA|LA-C3-1	C03	7.81	0.3-9	3.2116	-0.5525	10.7531	10GS
	ccqOA|LA-C3-2	C03	21.61	21.3-26.5	3.06838	-0.56	10.4159	10GS
	ccqOA|LA-C3-3	C03	61.01	57.6-61.2	3.66296	-0.3836	4.7309	11DL
	ccqOA|LA-C3-4	C03	68.31	64.8-69.2	3.03149	-0.3354	3.8782	12WH
	ccqOA|LA-C3-5	C03	110.71	108.82-112.6	3.03-4.98	-0.59--0.28	3.72-7.85	09DL/11WH
	ccqOA|LA-C3-6	C03	176.01	172.4-176.4	3.9494	-0.3227	4.8196	09DL
	ccqOA|LA-C3-7	C03	183.61	182.5-184.1	2.68429	-0.2767	3.0876	12DL
	ccqOA|LA-C3-8	C03	184.41	184.1-191.3	3.9494	-0.3304	4.7958	09DL
	ccqOA|LA-C4-1	C04	128.91	125.3-131.9	4.14253	0.4027	5.8044	11DL
	ccqOA|LA-C4-2	C04	146.41	131.9-147.1	2.53022	0.3422	3.2289	13WH
	ccqOA|LA-C4-3	C04	150.71	148.9-152.6	2.64089	0.3127	3.6072	12WH
	ccqOA|LA-C5-1	C05	57.58	56.24-58.91	4.78-6.33	-0.42--0.40	7.4-8.66	09DL/10DL/11HG
	ccqOA|LA-C5-2	C05	66.27	66.11-66.43	3.75-7.98	-0.57--0.44	5.72-11.68	09DL/11DL/12DL/11HG
	ccqOA|LA-C5-3	C05	68.09	67.61-68.57	2.68-6.49	-0.46--0.31	3.56-9.65	10DL/12WH
	ccqOA|LA-C5-4	C05	70.49	69.68-71.29	3.99-7.51	-0.46--0.44	5.52-10.10	13DL/13WH
	ccqOA|LA-C5-5	C05	73.52	72.63-74.41	3.7-7.27	-0.45--0.33	5.29-7.38	09DL/12DL
	ccqOA|LA-C5-6	C05	79.51	78.54-80.47	2.95-6.74	-0.49--0.42	4.88-11.30	13DL/13WH
	ccqOA|LA-C5-7	C05	161.51	148.7-167.7	2.68646	0.2919	6.9225	08DL
	ccqOA|LA-C5-8	C05	169.21	167.7-173.6	2.98809	0.3037	7.6513	08DL
	ccqOA|LA-C5-9	C05	181.11	177.8-184.6	2.64957	-0.3177	3.4547	11DL
	ccqOA|LA-C6-1	C06	54.81	54.4-55.5	2.60834	-0.4614	3.6125	13WH
	ccqOA|LA-C6-2	C06	62.71	61.7-63.2	3.13565	-0.451	4.2664	13WH
	ccqOA|LA-C6-3	C06	79.81	76.5-82.5	3.39822	-0.4557	8.8014	08DL
	ccqOA|LA-C7	C07	44.11	43.2-46.5	3.02932	-0.4403	4.3333	11WH
	ccqOA|LA-C8-1	C08	34.51	23.6-44.1	2.60834	-0.4104	5.032	14WH
	ccqOA|LA-C8-2	C08	65.61	60.4-69.8	2.71684	0.273	3.3428	09DL
	ccqOA|LA-C9-1	C09	11.01	8.1-12.6	2.92733	-0.297	3.3542	12DL
	ccqOA|LA-C9- 2	C09	12.88	12.61-13.16	2.72-5.65	-0.44--0.33	3.4-7.59	09DL/12WH/11HG
	ccqOA|LA-C9-3	C09	17.31	15.7-17.6	7.70784	-0.5036	10.2945	13DL
	ccqOA|LA-C9-4	C09	19.01	18.3-19.2	3.39605	-0.315	3.8841	12DL
	ccqOA|LA-C9-5	C09	20.91	20.3-22.6	2.64523	0.4018	5.0747	14YL
	ccqOA|ALA-A1-1	A01	6.71	4.5-8	3.05319	0.5516	6.0071	11GS
	ccqOA|ALA-A1-2	A01	22.41	11.3-25.1	3.79316	0.1522	4.3252	09DL
	ccqOA|ALA-A1-3	A01	27.71	25.1-30	3.54361	0.1453	4.0879	09DL
	ccqOA|ALA-A3-1	A03	104.11	103.2-104.8	5.82645	-0.1926	7.39	09DL
	ccqOA|ALA-A3-2	A03	112.41	111.87-112.94	2.63-5.37	-0.35--0.15	3.5-6.2	09DL/12DL/13DL
	ccqOA|ALA-A3-3	A03	115.31	114.5-116.5	3.23981	-0.5342	6.6564	11DL
	ccqOA|ALA-A3-4	A03	120.11	119-122.6	2.54758	-0.2917	4.044	13DL
	ccqOA|ALA-A3-5	A03	127.71	126.4-129.2	4.96279	-0.241	8.5613	14YL
	ccqOA|ALA-A4-1	A04	22.81	22.1-23.6	2.75807	0.3629	3.9899	13DL
	ccqOA|ALA-A4-2	A04	29.91	25.3-33.1	2.69731	0.8023	6.1014	10GS
	ccqOA|ALA-A5-1	A05	24.41	22.9-27.3	2.77977	-0.1937	4.8779	14YL
	ccqOA|ALA-A5-2	A05	33.88	32.59-35.16	4.06-5.50	-0.32--0.26	7.14-8.51	11WH/14YL
	ccqOA|ALA-A5-3	A05	40.27	39.75-40.79	2.7-4.68	-0.36--0.13	3.12-7.32	09DL/13DL/11WH/12WH
	ccqOA|ALA-A5-4	A05	47.21	46.53-47.88	4.53-5.60	-0.40--0.29	7.14-8.20	13DL/12WH
	ccqOA|ALA-A5-5	A05	56.51	55.5-57.7	5.46623	-0.2845	7.9037	12WH
	ccqOA|ALA-A5-6	A05	61.61	59.5-61.7	3.05102	-0.169	4.4239	12DL
	ccqOA|ALA-A5-7	A05	63.51	63.2-67.6	2.90346	-0.2547	4.7928	10DL
	ccqOA|ALA-A5-8	A05	70.51	69.03-71.98	2.83-4.53	-0.24--0.21	4.52-6.46	12DL/11HG
	ccqOA|ALA-A5-9	A05	75.11	68-77.7	2.64523	-0.1383	3.7123	09DL
	ccqOA|ALA-A6-1	A06	28.81	26.5-31.7	3.30925	0.7224	7.0082	10GS
	ccqOA|ALA-A6-2	A06	37.51	34.6-40	3.69551	0.7637	7.7735	10GS
	ccqOA|ALA-A6-3	A06	43.41	42.5-44.5	4.1664	0.8027	8.7392	10GS
	ccqOA|ALA-A6-4	A06	62.91	62.1-65	3.06838	0.2046	7.5524	08DL
	ccqOA|ALA-A6-5	A06	64.41	63.6-65.2	2.93601	0.1338	3.3912	09DL
	ccqOA|ALA-A8-1	A08	21.91	19.9-23.6	2.83185	-0.1966	3.972	12WH
	ccqOA|ALA-A8-2	A08	28.11	26-30.7	2.76892	-0.2387	4.5871	11WH
	ccqOA|ALA-A8-3	A08	32.07	30.78-33.37	3.28-4.31	-0.51--0.29	6.47-7.03	11WH/11GS
	ccqOA|ALA-A8-4	A08	42.01	40.3-51.4	3.38954	-0.2655	5.451	11HG
	ccqOA|ALA-A8-5	A08	46.45	44.45-48.45	3.07-3.26	-0.27--0.14	3.88-5.60	09DL/10DL
	ccqOA|ALA-A8-6	A08	56.01	52.43-59.58	5.05-5.11	-0.37--0.20	7.76-10.64	09DL/10DL
	ccqOA|ALA-A8-7	A08	58.01	49.6-61.1	4.44633	-0.4326	9.9162	11WH
	ccqOA|ALA-A8-8	A08	67.29	62.4-72.18	2.83-3.50	-0.32--0.19	6.88-7.89	09DL/10DL
	ccqOA|ALA-A9-1	A09	99.01	91.9-102.4	4.88684	-0.318	8.0012	11HG
	ccqOA|ALA-A9-2	A09	125.81	122.6-127.5	2.56494	-0.2196	3.8594	11WH
	ccqOA|ALA-A9-3	A09	129.31	128.9-130.5	2.52154	-0.631	5.2256	10GS
	ccqOA|ALA-A9-4	A09	135.61	134.74-136.47	2.6-2.97	-0.22--0.13	3.43-3.92	09DL/11WH
	ccqOA|ALA-10-1	A10	63.45	61.48-65.42	3.86-4.91	-0.28--0.17	5.06-7.7	09DL/12WH
	ccqOA|ALA-10-2	A10	71.28	69.59-72.98	4.59-7	-0.34--0.23	7.45-10.71	12DL/12WH
	ccqOA|ALA-C1-1	C01	44.31	43.3-44.8	2.98809	0.1496	3.4738	09DL
	ccqOA|ALA-C1-2	C01	47.41	47.1-48.4	6.86805	0.3227	10.0842	12WH
	ccqOA|ALA-C1-3	C01	55.11	54.2-56.1	5.84381	0.3024	8.7291	12WH
	ccqOA|ALA-C1-4	C01	75.61	74.5-78	2.59966	0.3283	4.59	13DL
	ccqOA|ALA-C2-1	C02	64.51	63.6-65.4	2.55192	0.1901	3.385	12WH
	ccqOA|ALA-C2-2	C02	72.21	71.1-73.2	2.69297	0.1852	4.2932	12DL
	ccqOA|ALA-C2-3	C02	76.41	76.1-79.6	2.87959	0.1895	4.568	12DL
	ccqOA|ALA-C2-4	C02	77.71	75.9-79.5	2.51937	0.2022	3.4173	12WH
	ccqOA|ALA-C3	C03	132.11	131-132.8	2.6908	-0.1288	3.1817	09DL
	ccqOA|ALA-C4-1	C04	35.51	32.5-46	2.54107	0.1871	4.4928	14WH
	ccqOA|ALA-C4-2	C04	120.51	109.4-125.6	2.57145	0.1304	3.3559	09DL
	ccqOA|ALA-C4-3	C04	128.91	126.06-131.75	3.17-3.38	0.15-0.17	4.16-4.46	09DL/12DL
	ccqOA|ALA-C4-4	C04	143.71	135.7-144.9	3.4286	0.1743	4.87	12DL
	ccqOA|ALA-C5-1	C05	79.51	74.5-81.8	2.70599	-0.2426	4.404	11WH
	ccqOA|ALA-C5-2	C05	114.22	113.58-114.85	2.54-5.33	0.19-0.22	3.9-7.09	09DL/11WH
	ccqOA|ALA-C5-3	C05	122.21	120.6-122.4	7.60368	0.2236	9.7844	09DL
	ccqOA|ALA-C5-4	C05	130.61	124.17-137.05	2.61-4.73	0.30-0.39	7.03-12.48	10DL/11WH
	ccqOA|ALA-C6-1	C06	41.51	30.8-43.9	3.56531	-0.2776	5.7454	11HG
	ccqOA|ALA-C6-2	C06	60.81	60.5-61.2	2.74288	0.7143	5.7715	11DL
	ccqOA|ALA-C7-1	C07	63.61	56.4-65.7	2.86223	0.1923	6.904	08DL
	ccqOA|ALA-C7-2	C07	93.21	87.7-96.1	2.88176	0.2498	4.7767	10DL
	ccqOA|ALA-C7-3	C07	97.81	96.1-99.5	3.82571	0.573	7.5563	11GS
	ccqOA|ALA-C9-1	C09	4.01	0-8.1	3.05319	-0.2279	6.2379	12DL
	ccqOA|ALA-C9-2	C09	13.31	11-14.1	3.94072	-0.1955	5.1266	12DL
	ccqOA|ALA-C9-3	C09	20.41	20.1-20.9	3.73023	-0.1821	4.8594	12DL
	ccqOA|ALA-C9-4	C09	21.91	20.9-23.2	3.9928	-0.247	5.6662	12WH
	ccqOA|ALA-C9-5	C09	27.31	26.7-27.6	3.10961	-0.1665	4.123	12DL
	ccqOA|EIA-A2	A02	48.01	46.5-53.9	2.67561	-0.1917	3.9252	13WH
	ccqOA|EIA-A3-1	A03	9.41	8.6-9.9	4.47454	0.6559	8.265	14WH
	ccqOA|EIA-A3-2	A03	11.01	10.5-12.9	4.20112	-0.2029	6.229	12WH
	ccqOA|EIA-A3-3	A03	20.31	18.2-21	3.00979	-0.1757	4.5006	12WH
	ccqOA|EIA-A3-4	A03	24.21	22.8-24.9	2.58447	-0.3701	4.9978	14WH
	ccqOA|EIA-A3-5	A03	112.11	111.42-112.79	3.5-5.37	0.227-0.228	5.48-8.02	12WH/13WH
	ccqOA|EIA-A3-6	A03	120.11	119-121.4	4.25754	0.2031	6.4605	12WH
	ccqOA|EIA-A6-1	A06	46.21	45.7-47.1	5.48576	-0.3038	9.0336	13WH
	ccqOA|EIA-A6-2	A06	55.61	54.7-55.9	3.83005	-0.2557	6.2469	13WH
	ccqOA|EIA-A7	A07	84.71	80.1-94.1	3.00762	0.539	7.0741	08DL
	ccqOA|EIA-A9-1	A09	49.31	48.4-52.2	4.45718	0.2835	7.1433	13WH
	ccqOA|EIA-A9-2	A09	58.41	56.5-60.3	5.10601	0.2977	8.1301	13WH
	ccqOA|EIA-A9-3	A09	134.51	132.6-135.6	5.18847	0.2358	8.058	12WH
	ccqOA|EIA-A9-4	A09	142.91	142.6-144.9	7.11977	0.2742	10.8327	12WH
	ccqOA|EIA-A9-5	A09	151.81	151.3-152.9	4.56785	0.2191	7.1663	12WH
	ccqOA|EIA-A10	A10	18.41	17.8-19	2.63438	-0.1928	3.6208	12WH
	ccqOA|EIA-C3	C03	28.61	25.1-30.7	3.95808	-0.6654	9.4671	08DL
	ccqOA|EIA-C5-1	C05	80.51	77.7-81.8	2.76024	0.1634	4.1437	12WH
	ccqOA|EIA-C5-2	C05	85.61	83.2-85.8	3.906	0.192	5.7506	12WH
	ccqOA|EIA-C5-3	C05	94.21	93-101.4	3.26368	0.1772	4.8438	12WH
	ccqOA|EIA-C6	C06	49.11	47.6-50.9	3.4286	-0.6886	8.1903	08DL
	ccqOA|EIA-C7	C07	38.11	34.7-39.4	2.55843	0.1622	3.7253	12WH
	ccqOA|EIA-C8-1	C08	17.81	16.9-19.2	3.44813	0.2317	5.4193	13WH
	ccqOA|EIA-C8-2	C08	24.51	19.2-33.9	3.69117	0.2421	5.7944	13WH
	ccqOA|EIA-C9	C09	17.41	17.3-17.6	2.96856	0.2413	4.7371	13WH
	ccqOA|EA-A1	A01	22.32	18.63-26.01	3.86-4.16	-1.11--0.51	6.16-6.73	12WH/11HG
	ccqOA|EA-A2-1	A02	41.91	41.1-43.1	3.63041	-1.1029	10.0382	11GS
	ccqOA|EA-A2-2	A02	48.01	47.2-52.9	4.97581	-1.2851	13.0527	11GS
	ccqOA|EA-A2-3	A02	57.01	56.7-62.1	3.03366	-1.1138	8.2428	11GS
	ccqOA|EA-A3-1	A03	46.31	45.8-47.5	2.68646	-0.6043	4.4662	14WH
	ccqOA|EA-A3-2	A03	89.01	87.7-89.4	2.8644	0.4892	4.398	13WH
	ccqOA|EA-A3-3	A03	98.21	93.5-102.9	6.40584	0.7145	9.4708	13WH
	ccqOA|EA-A3-4	A03	105.67	104.63-106.7	3.95-6.28	0.51-0.76	6.41-9.33	13DL/12WH/13WH
	ccqOA|EA-A3-5	A03	112.24	111.67-112.8	3.44-4.6	0.54-0.79	5.2-7.41	11DL/12WH
	ccqOA|EA-A3-6	A03	116.51	115.3-116.9	3.15084	0.7553	4.7296	11DL
	ccqOA|EA-A3-7	A03	121.81	121.4-122.3	3.02498	0.4454	4.9587	12WH
	ccqOA|EA-A4-1	A04	5.31	3.8-8.7	2.7559	-0.8029	4.3647	09DL
	ccqOA|EA-A4-2	A04	11.71	10.6-12	2.70599	-0.7908	4.2421	09DL
	ccqOA|EA-A4-3	A04	15.31	15.1-15.8	4.37472	-1.1002	6.8652	10DL
	ccqOA|EA-A4-4	A04	17.81	17.5-21	2.96205	-0.8239	4.7705	11WH
	ccqOA|EA-A5-1	A05	23.91	23.6-24.4	3.42643	0.5743	5.1471	13DL
	ccqOA|EA-A5-2	A05	29.41	24.5-31.2	2.74288	0.6538	4.4401	11WH
	ccqOA|EA-A5-3	A05	32.51	31.2-33.6	2.59098	0.7373	3.8379	09DL
	ccqOA|EA-A5-4	A05	34.11	33.6-37.1	5.3382	0.6985	7.8602	13DL
	ccqOA|EA-A5-5	A05	39.91	39.1-40.2	4.7306	0.6602	7.0258	13DL
	ccqOA|EA-A5-6	A05	50.51	48.1-50.9	2.83185	0.711	4.4663	09DL
	ccqOA|EA-A5-7	A05	52.41	50.9-53.3	3.41341	0.8231	5.1568	11DL
	ccqOA|EA-A5-8	A05	59.91	58.88-60.93	3-5.66	0.66-0.88	4.7-8.3	09DL/10DL/11DL/13WH
	ccqOA|EA-A5-9	A05	75.11	71.1-77.7	2.98592	0.4651	5.2806	12WH
	ccqOA|EA-A6-1	A06	49.81	47.4-50.1	2.51937	-0.8408	4.017	11HG
	ccqOA|EA-A6-2	A06	114.71	112.8-117.8	2.7342	0.7678	4.6934	12DL
	ccqOA|EA-A7-1	A07	7.45	4.2-10.71	2.68-3.59	0.83-0.87	5.2-7.8	11DL/11WH
	ccqOA|EA-A7-2	A07	13.75	13.22-14.27	3.64-4.3	0.80-0.83	5.71-7.13	09DL/11DL/11WH
	ccqOA|EA-A7-3	A07	22.31	22.1-24	2.387	0.6889	3.8352	09DL
	ccqOA|EA-A8-1	A08	14.11	4-17.6	2.71684	0.4132	4.0512	12WH
	ccqOA|EA-A8-2	A08	21.64	20.1-23.17	2.86-3.83	0.42-0.93	4.25-6.83	12DL/12WH
	ccqOA|EA-A8-3	A08	23.61	21.4-25.6	3.23764	0.5433	4.6597	13DL
	ccqOA|EA-A8-4	A08	31.21	27.9-31.6	5.34037	1.0987	9.5238	12DL
	ccqOA|EA-A8-5	A08	32.31	31.6-34.7	2.49767	0.3905	3.7564	12WH
	ccqOA|EA-A8-6	A08	38.51	37.6-38.7	4.72626	1.0256	8.3762	12DL
	ccqOA|EA-A9-1	A09	17.91	16.1-19.3	5.41415	1.281	8.9259	11HG
	ccqOA|EA-A9-2	A09	36.31	35.6-38.6	3.24415	0.8952	5.6855	14YL
	ccqOA|EA-A9-3	A09	51.11	48.9-55.8	3.82788	0.9717	6.7331	14YL
	ccqOA|EA-A9-4	A09	137.91	137.1-139.2	2.61268	-0.4172	4.129	12WH
	ccqOA|EA-A10-1	A10	18.31	17.2-19	3.27019	-0.9852	5.0913	10DL
	ccqOA|EA-A10-2	A10	23.81	23-23.9	3.15952	-0.9557	4.9499	10DL
	ccqOA|EA-C2-1	C02	51.51	50.2-54.5	3.24849	1.0126	5.5303	11HG
	ccqOA|EA-C2-2	C02	59.21	58.3-59.7	5.01487	1.286	8.1884	11HG
	ccqOA|EA-C2-3	C02	66.31	64.5-67	3.55012	1.0554	5.8872	11HG
	ccqOA|EA-C2-4	C02	110.61	107.7-111.8	3.64343	-0.5315	5.2996	13WH
	ccqOA|EA-C2-5	C02	118.01	116.4-119.1	4.20329	-0.5605	6.0791	13WH
	ccqOA|EA-C3-1	C03	18.11	17.4-20.1	4.71107	0.6849	6.8954	13DL
	ccqOA|EA-C3-2	C03	25.71	25.1-28.3	3.7107	0.6151	5.4914	13DL
	ccqOA|EA-C3-3	C03	51.71	47.9-57	3.09442	0.8436	5.326	12DL
	ccqOA|EA-C3-4	C03	57.61	57-61.2	2.65391	0.7787	4.5893	12DL
	ccqOA|EA-C3-5	C03	111.21	107.8-112.5	2.7559	0.6924	4.4049	09DL
	ccqOA|EA-C3-6	C03	118.31	112.5-122.8	3.4069	0.7671	5.3755	09DL
	ccqOA|EA-C3-7	C03	141.11	138.8-148.4	2.78411	-0.9165	7.0759	11GS
	ccqOA|EA-C3-8	C03	172.61	167.7-176	3.81269	-0.9748	6.8739	14YL
	ccqOA|EA-C3-9	C03	176.41	176-178.9	3.59352	0.5392	5.1374	13WH
	ccqOA|EA-C3-10	C03	186.51	184.7-199.8	3.48068	0.5296	4.9823	13WH
	ccqOA|EA-C4-1	C04	140.91	135.7-145.2	2.63221	-0.8908	6.7478	11GS
	ccqOA|EA-C4-2	C04	145.01	135.7-146.4	2.79062	-0.4422	3.7389	13WH
	ccqOA|EA-C5-1	C05	58.91	55.4-60.1	3.48719	0.4951	5.7786	12WH
	ccqOA|EA-C5-2	C05	64.51	60.1-65.6	3.46983	0.507	4.9699	13WH
	ccqOA|EA-C5-3	C05	69.11	68.8-69.4	4.98666	0.6042	8.0835	12WH
	ccqOA|EA-C5-4	C05	74.51	73.7-75.3	3.85826	0.5584	6.3071	12WH
	ccqOA|EA-C5-5	C05	101.61	100.7-102.9	2.91214	-0.4497	4.5999	12WH
	ccqOA|EA-C5-6	C05	169.21	167.7-173.8	3.02498	-0.7116	7.5744	08DL
	ccqOA|EA-C5-7	C05	178.71	177.8-180.8	2.56277	0.8964	6.3922	11GS
	ccqOA|EA-C6	C06	49.11	48.1-50.8	4.72409	1.0363	11.535	08DL
	ccqOA|EA-C7	C07	98.61	92.8-99.5	2.55626	-0.8376	4.1555	11HG
	ccqOA|EA-C8-1	C08	3.91	0-6.7	3.74542	-1.3865	13.6885	10GS
	ccqOA|EA-C8-2	C08	11.21	11.1-15.9	3.89949	-1.4074	14.1802	10GS
	ccqOA|EA-C8-3	C08	37.01	26.9-44.1	3.50021	0.568	6.1139	14WH
	ccqOA|EA-C8-4	C08	45.01	44.1-47	3.08357	0.549	5.4195	14WH
	ccqOA|EA-C8-5	C08	93.31	91.75-94.86	2.74-3.2	0.77-0.85	4.17-4.96	10DL/11DL
	ccqOA|EA-C8-6	C08	102.2	101.54-102.87	2.97-3.23	0.80-0.81	4.6-4.82	10DL/11DL
	ccqOA|EA-C9-1	C09	11.01	8.1-12.2	2.72552	0.7955	4.2037	10DL
	ccqOA|EA-C9-2	C09	19.01	18.3-19.2	2.54758	0.755	3.9405	10DL
	ccqOA|FAS-A1-1	A01	19.85	16.14-23.55	2.81-5.25	0.04-0.06	4.23-7.27	09DL/12DL/11HG
	ccqOA|FAS-A1-2	A01	34.11	33.34-34.87	2.58-4.59	0.05-0.06	3.46-5.95	13DL/11HG
	ccqOA|FAS-A1-3	A01	40.09	39.14-41.04	2.79-3.59	0.04-0.04	3.52-4.71	12DL/13DL
	ccqOA|FAS-A1-4	A01	52.71	48.6-53.5	3.29189	0.0494	4.1961	10DL
	ccqOA|FAS-A1-5	A01	58.82	58.54-59.1	6.61-6.72	0.07-0.10	8.3-23.3	10DL/10GS
	ccqOA|FAS-A1-6	A01	64.7	64.41-65	5.9-8.5	0.06-0.11	7.34-28.52	10DL/10GS
	ccqOA|FAS-A1-7	A01	76.01	74-78	4.91505	0.0871	20.8318	10GS
	ccqOA|FAS-A1-8	A01	85.08	83.4-86.76	2.92-3.46	0.05-0.07	4.57-4.69	11DL/11HG
	ccqOA|FAS-A2-1	A02	41.41	40.1-43.2	2.94469	0.0427	3.2643	10DL
	ccqOA|FAS-A2-2	A02	101.81	99.3-103	2.87308	0.0714	6.8408	10GS
	ccqOA|FAS-A3-1	A03	45.41	44.4-45.8	2.65174	0.0413	3.1838	13DL
	ccqOA|FAS-A3-2	A03	56.51	55.2-60	2.76458	0.0418	3.3163	13DL
	ccqOA|FAS-A3-3	A03	84.61	81.6-87.7	3.47851	-0.0527	4.2326	11DL
	ccqOA|FAS-A3-4	A03	138.61	137.7-143.1	2.93601	0.0547	8.2029	10GS
	ccqOA|FAS-A5	A05	57.81	56.6-59	4.42897	-0.0524	5.7301	13DL
	ccqOA|FAS-A6-1	A06	1.61	0-3.2	4.87816	0.0563	6.5647	13DL
	ccqOA|FAS-A6-2	A06	10.8	8.43-13.18	3.56-6.52	0.05-0.06	4.3-8.62	11DL/13DL
	ccqOA|FAS-A6-3	A06	16.81	16-17.8	5.82862	0.0596	7.8057	13DL
	ccqOA|FAS-A6-4	A06	24.71	18.9-25.7	2.50635	0.05	3.0088	11WH
	ccqOA|FAS-A6-5	A06	29.91	29.1-31.7	3.08357	0.0486	3.7528	11DL
	ccqOA|FAS-A6-6	A06	34.41	33.6-35.9	6.13459	0.0878	8.5471	11HG
	ccqOA|FAS-A6-7	A06	40.51	37.5-41.1	4.37255	0.0754	6.2142	11HG
	ccqOA|FAS-A6-8	A06	48.01	46.7-48.9	2.53456	0.0457	2.8357	10DL
	ccqOA|FAS-A6-9	A06	107.61	103.7-112.2	2.57579	-0.0357	3.0816	09DL
	ccqOA|FAS-A6-10	A06	116.11	113.95-118.26	3-3.28	-0.05--0.05	3.56-4	11DL/11WH
	ccqOA|FAS-A6-11	A06	119.81	114.3-121.3	4.7523	-0.0564	5.4652	10DL
	ccqOA|FAS-A6-12	A06	123.21	119.8-125.1	3.26368	-0.0576	9.2342	10GS
	ccqOA|FAS-A7-1	A07	5.41	1.4-6.9	2.70165	-0.0481	4.8261	13DL
	ccqOA|FAS-A7-2	A07	13.21	11.6-13.7	3.68683	-0.0444	4.3805	13DL
	ccqOA|FAS-A7-3	A07	15.51	14.7-16.2	6.64237	-0.0639	9.0367	09DL
	ccqOA|FAS-A7-4	A07	17.41	16.77-18.04	4.72-5.33	-0.07--0.06	6.19-6.45	10DL/11WH
	ccqOA|FAS-A7-5	A07	19.21	18.34-20.07	3.64-6.95	-0.06--0.05	4.4-9.2	09DL/11DL
	ccqOA|FAS-A7-6	A07	23.5	22.92-24.08	3.21-6.93	-0.07--0.04	3.83-9.19	09DL/10DL/13DL/11WH
	ccqOA|FAS-A7-7	A07	28.21	27.4-28.8	5.04742	-0.0595	6.131	10DL
	ccqOA|FAS-A7-8	A07	75.11	74.7-77.5	2.93167	-0.0542	3.5053	11WH
	ccqOA|FAS-A7-9	A07	100.31	97.5-105.4	3.31576	-0.0586	3.9894	11WH
	ccqOA|FAS-A7-10	A07	112.21	108.3-113.9	2.60834	-0.0437	2.9153	10DL
	ccqOA|FAS-A7-11	A07	118.11	116.1-120.4	4.86731	-0.0807	7.8643	11WH
	ccqOA|FAS-A8-1	A08	30.71	26.8-31.2	3.08791	-0.0412	3.7032	13DL
	ccqOA|FAS-A8-2	A08	32.31	31.6-32.9	5.90457	-0.0813	8.0463	11WH
	ccqOA|FAS-A8-3	A08	38.11	37.6-38.5	7.06118	-0.0873	9.3832	11WH
	ccqOA|FAS-A8-4	A08	43.41	38.7-48.1	2.97507	-0.0473	3.6214	11DL
	ccqOA|FAS-A9-1	A09	106.71	105.3-106.9	3.29189	0.0476	3.7642	10DL
	ccqOA|FAS-A9-2	A09	120.18	119.38-120.98	6.31-7.41	0.0727-0.0749	8.57-9.35	11DL/12DL
	ccqOA|FAS-A9-3	A09	125.8	125.01-126.6	4.03-7.17	0.05-0.08	5.17-9.64	09DL/11DL
	ccqOA|FAS-A9-4	A09	128.91	128.1-129.8	6.51651	0.0709	8.297	12DL
	ccqOA|FAS-A9-5	A09	132.71	132.12-133.29	4.1-13.93	0.05-0.11	5.25-18.65	09DL/10DL
	ccqOA|FAS-A9-6	A09	136.01	135.37-136.64	4.54-6.25	0.07-0.07	6.25-8.55	11DL/11WH
	ccqOA|FAS-A9-7	A09	139.95	136.69-140.21	4.12-12.96	0.08-0.14	5.71-22.28	10DL/11WH/11HG/11GS
	ccqOA|FAS-A9-8	A09	145.91	143.7-146.3	7.37366	0.0942	9.8493	11WH
	ccqOA|FAS-A9-9	A09	149.81	148.8-151.5	3.52842	0.0919	10.2748	11GS
	ccqOA|FAS-A10-1	A10	4.61	3.8-5.1	3.42426	0.0677	4.0962	11WH
	ccqOA|FAS-A10-2	A10	57.91	57.1-59	2.52805	0.0564	3.2076	11HG
	ccqOA|FAS-A10-3	A10	60.41	57.1-65.6	2.52805	0.044	2.8668	12DL
	ccqOA|FAS-C2-1	C02	58.31	57.8-58.9	5.69842	-0.0625	8.0119	09DL
	ccqOA|FAS-C2-2	C02	63.1	62.78-63.42	3.43-6.4	-0.07--0.06	4.19-8.49	09DL/10DL/12DL/13DL/11WH
	ccqOA|FAS-C2-3	C02	63.91	62-64.4	3.75844	-0.0597	4.9299	11DL
	ccqOA|FAS-C2-4	C02	66.79	66.41-67.17	2.41-7	-0.07--0.06	6.77-9.21	09DL/12DL/10GS
	ccqOA|FAS-C2-5	C02	70.71	69.3-70.7	4.00582	-0.0584	4.9002	10DL
	ccqOA|FAS-C2-6	C02	71.21	70.7-71.4	2.65825	-0.0588	3.1955	11WH
	ccqOA|FAS-C2-7	C02	76.01	75.3-76.4	4.46586	-0.063	5.5072	12DL
	ccqOA|FAS-C2-8	C02	87.51	85.8-89.6	2.6908	-0.0578	3.4172	11HG
	ccqOA|FAS-C3-1	C03	5.91	4.2-7	3.07706	-0.0617	9.7075	10GS
	ccqOA|FAS-C3-2	C03	11.41	7.9-11.8	4.18159	-0.0701	13.0376	10GS
	ccqOA|FAS-C3-3	C03	16.81	14.8-17.4	4.66984	-0.0749	14.1225	10GS
	ccqOA|FAS-C3-4	C03	20.11	18.4-21	5.00619	-0.0749	14.9372	10GS
	ccqOA|FAS-C3-5	C03	21.31	18.6-23.4	3.22028	-0.0433	3.8394	13DL
	ccqOA|FAS-C3-6	C03	25.71	25.1-26.2	4.04271	-0.067	12.4099	10GS
	ccqOA|FAS-C3-7	C03	31.81	30.7-33.7	4.33349	-0.0504	5.1176	13DL
	ccqOA|FAS-C3-8	C03	38.51	33.7-39.5	4.62861	-0.0515	5.4411	13DL
	ccqOA|FAS-C3-9	C03	44.31	42.5-47.4	4.19027	-0.0491	4.9479	13DL
	ccqOA|FAS-C3-10	C03	53.81	52.1-57.9	3.32878	-0.0435	3.964	13DL
	ccqOA|FAS-C3-11	C03	64.51	62.5-65.5	2.74071	-0.0536	3.1233	10DL
	ccqOA|FAS-C3-12	C03	67.91	67.3-68.3	3.56097	-0.0553	4.4418	11DL
	ccqOA|FAS-C3-13	C03	69.21	68.3-69.8	5.39245	-0.0663	6.6607	12DL
	ccqOA|FAS-C3-14	C03	73.54	72.72-74.35	2.83-3.35	-0.044--0.043	3.16-3.99	10DL/13DL
	ccqOA|FAS-C3-15	C03	76.11	75.27-76.94	3.03-5.44	-0.06--0.05	3.69-6.71	11DL/12DL
	ccqOA|FAS-C3-16	C03	81.11	79.82-82.39	2.64-6.28	-0.07--0.04	3.11-7.69	10DL/11DL/12DL/13DL
	ccqOA|FAS-C3-17	C03	102.41	100.58-104.23	4.18-6.09	-0.07--0.068	5.6-8	11DL/11WH
	ccqOA|FAS-C3-18	C03	111.65	110.72-112.57	3.56-5.13	-0.07--0.05	4.66-7.09	09DL/11DL
	ccqOA|FAS-C3-19	C03	118.11	116.51-119.7	4.73-6.02	-0.08--0.05	6.13-7.92	09DL/11WH
	ccqOA|FAS-C3-20	C03	126.91	126.33-127.5	2.62-3.04	-0.07-0.08	3.7-6.14	09DL/11DL/11GS
	ccqOA|FAS-C3-21	C03	132.11	130.6-133.1	2.91431	-0.0689	6.8021	11GS
	ccqOA|FAS-C3-22	C03	136.01	134.9-138.8	2.51503	0.056	3.1539	11DL
	ccqOA|FAS-C4	C04	57.61	56.6-59.2	3.17905	-0.05	3.906	11DL
	ccqOA|FAS-C5-1	C05	56.47	54.78-58.16	2.86-4.07	-0.06--0.05	3.67-5.16	10DL/12DL
	ccqOA|FAS-C5-2	C05	64.91	62-65.2	6.12374	-0.0673	7.6167	12DL
	ccqOA|FAS-C5-3	C05	67.81	67.2-68.2	3.41992	-0.0436	4.4712	09DL
	ccqOA|FAS-C5-4	C05	68.74	68.41-69.06	4.21-7.41	-0.07--0.06	5.59-9.84	10DL/11DL/13DL
	ccqOA|FAS-C5-5	C05	70.31	69.7-71.2	5.67889	-0.065	7.0972	12DL
	ccqOA|FAS-C5-6	C05	72.91	71.2-73.7	4.80221	-0.0762	6.5889	11HG
	ccqOA|FAS-C5-7	C05	77.51	76.45-78.56	4.52-4.99	-0.06--0.05	5.88-6.31	09DL/10DL/11DL
	ccqOA|FAS-C5-8	C05	79.51	77.5-80.3	5.90457	-0.0641	9.2171	13DL
	ccqOA|FAS-C5-9	C05	104.51	101.7-108.8	2.55409	0.0555	3.2299	11HG
	ccqOA|FAS-C5-10	C05	120.61	119.7-123.8	2.74939	0.0558	3.4733	11HG
	ccqOA|FAS-C5-11	C05	143.91	133.4-155.3	3.99063	0.0546	4.3756	10DL
	ccqOA|FAS-C6	C06	79.81	78.1-81.5	4.76315	0.0974	6.2143	11WH
LA	ccqLA|PA-A1-1	A01	65.41	63.2-67.8	2.54975	0.0299	3.0324	13WH
	ccqLA|PA-A1-2	A01	74.01	73.1-76.3	4.02535	-0.0489	10.5321	08DL
	ccqLA|PA-A2-1	A02	50.01	46.8-53.9	3.32661	-0.0375	4.8457	13WH
	ccqLA|PA-A2-2	A02	66.51	65.9-69.1	2.85138	-0.0313	3.3802	13WH
	ccqLA|PA-A7-1	A07	22.81	21.9-25.8	2.52154	-0.0304	3.1849	12WH
	ccqLA|PA-A7-2	A07	97.21	92.6-101.2	7.97258	-0.057	11.3041	12WH
	ccqLA|PA-A7-3	A07	100.71	100.5-102.9	4.25971	-0.0406	5.7096	13WH
	ccqLA|PA-A7-4	A07	106.9	106.29-107.52	5.75-6.14	-0.05--0.04	8.07-8.36	12WH/13WH
	ccqLA|PA-A7-5	A07	112.01	111.6-113.2	6.63369	-0.053	8.7171	13WH
	ccqLA|PA-A8-1	A08	18.21	15.8-18.9	3.64994	-0.0369	4.6258	13WH
	ccqLA|PA-A8-2	A08	22.91	19.9-24.1	3.40256	-0.0383	5.1125	13WH
	ccqLA|PA-A9-1	A09	134.91	132.4-135.3	8.97729	-0.0624	12.9833	13WH
	ccqLA|PA-A9-2	A09	142.61	142.3-142.9	12.7965	-0.0745	17.781	13WH
	ccqLA|PA-A9-3	A09	146.31	145.5-148.2	2.55409	-0.0315	3.4383	12WH
	ccqLA|PA-A9-4	A09	152.71	149.8-155.9	2.61919	-0.0314	3.5481	12WH
	ccqLA|PA-C2-1	C02	66.31	64.5-67	2.70816	-0.0328	3.2041	13WH
	ccqLA|PA-C2-2	C02	71.41	69.2-72.2	2.7993	-0.036	3.3179	13WH
	ccqLA|PA-C2-3	C02	79.01	77.7-81.1	2.58447	-0.0339	3.061	13WH
	ccqLA|PA-C5	C05	139.06	134.95-143.18	4.88-5.13	-0.049--0.049	7.06-7.08	12WH/13WH
	ccqLA|PA-C6-1	C06	51.11	49.1-52.7	3.18773	0.0403	5.1243	12WH
	ccqLA|PA-C6-2	C06	56.01	55.7-56.8	3.90166	0.0425	5.0823	13WH
	ccqLA|PA-C6-3	C06	61.35	61.02-61.67	3.22-3.67	0.04-0.04	4.13-4.72	12WH/13WH
	ccqLA|PA-C6-4	C06	73.31	73-75.1	2.74071	0.0359	3.4689	12WH
	ccqLA|PA-C9-1	C09	21.91	20.4-24.8	2.92733	0.0328	3.4669	13WH
	ccqLA|PA-C9-2	C09	23.91	23.6-24.8	8.99899	0.0647	13.9719	12WH
	ccqLA|SA-A3-1	A03	136.41	134.9-136.8	2.63655	0.0261	4.629	12WH
	ccqLA|SA-A3-2	A03	141.91	139.8-144.1	5.6854	0.037	9.553	12WH
	ccqLA|SA-A6	A06	99.71	99.1-106	2.98158	-0.028	5.4568	14WH
	ccqLA|SA-A8	A08	16.11	12.8-17.6	2.821	-0.0259	4.7051	12WH
	ccqLA|SA-C1	C01	90.61	90.3-91.8	2.98809	0.0441	7.8449	08DL
	ccqLA|SA-C3	C03	99.31	92.7-110	2.52371	0.0273	4.1098	13WH
	ccqLA|SA-C5-1	C05	153.91	143.5-164.1	2.55843	-0.0296	6.1831	12WH
	ccqLA|SA-C5-2	C05	162.51	149.5-164.1	3.09876	-0.0436	8.0636	08DL
	ccqLA|SA-C5-3	C05	165.81	164.1-165.9	2.71684	-0.0254	4.481	12WH
	ccqLA|SA-C5-4	C05	167.71	165.2-169.2	3.39822	-0.0452	8.6007	08DL
	ccqLA|SA-C7	C07	63.51	57.2-71.5	3.36784	-0.0365	6.3727	14WH
	ccqLA|SA-C9-1	C09	56.91	55.2-58.5	3.53927	0.0325	5.9664	13WH
	ccqLA|SA-C9-2	C09	63.61	62.6-64.7	4.65465	0.0373	7.9899	13WH
	ccqLA|SA-C9-3	C09	74.81	72.8-76.3	3.40473	0.0331	6.3259	13WH
	ccqLA|OA-A1-1	A01	20.31	11.6-22.4	3.25717	-2.071	4.7302	13WH
	ccqLA|OA-A1-2	A01	26.71	25.1-28.9	3.82354	-1.5614	5.8226	11HG
	ccqLA|OA-A2-1	A02	33.11	32-34.9	2.65174	-1.0731	3.1888	12DL
	ccqLA|OA-A2-2	A02	37.51	36.2-39.1	3.08574	-1.2129	4.1335	12DL
	ccqLA|OA-A2-3	A02	43.41	43.2-44.7	2.61702	-1.0653	3.1468	12DL
	ccqLA|OA-A2-4	A02	49.43	47.12-51.74	3.00-3.88864	-1.25--1.3778	4.48-5.1757	12DL/13DL
	ccqLA|OA-A2-5	A02	54.41	53.9-54.7	2.58447	-4.2069	10.4517	13WH
	ccqLA|OA-A2-6	A02	56.51	56.3-56.7	3.40907	-2.3842	8.3954	11GS
	ccqLA|OA-A2-7	A02	62.61	60.7-64.1	3.91034	-3.9425	15.1515	13WH
	ccqLA|OA-A2-8	A02	66.51	64.5-67.5	5.34254	-2.9261	12.6427	11GS
	ccqLA|OA-A2-9	A02	69.11	68-72.7	3.58267	-3.7953	14.0677	13WH
	ccqLA|OA-A3-1	A03	20.71	20-21.1	2.68429	-3.2979	4.5313	14WH
	ccqLA|OA-A3-2	A03	44.41	42.6-45.5	2.60617	-1.2002	3.1521	13DL
	ccqLA|OA-A3-3	A03	88.71	88-89.5	7.35413	1.9942	10.5555	12DL
	ccqLA|OA-A3-4	A03	98.16	96.88-99.45	3.69-10.56	1.57-2.34	5.12-14.9	11DL/12DL/12WH/13WH/14WH/11HG
	ccqLA|OA-A3-5	A03	105.11	104.61-105.61	3.09-8.40	1.44-2.5	4.34-11.85	11DL/12DL/13DL/11WH/12WH/13WH
	ccqLA|OA-A3-6	A03	110.41	108.5-111.1	6.98089	1.9057	10.4235	13DL
	ccqLA|OA-A3-7	A03	112.23	111.65-112.82	3.86-6.7	1.76-2.62	5.76-9.45	11DL/11WH/12WH
	ccqLA|OA-A3-8	A03	119.11	118.2-121	5.84381	2.4477	8.457	12WH
	ccqLA|OA-A5-1	A05	19.41	18.9-19.91	3.74-4.87	1.38-1.49	4.86-6.47	11DL/12DL/13DL/12WH
	ccqLA|OA-A5-2	A05	27.61	25.89-29.32	2.75156-3.99	1.2053-1.36	3.5945-5.19	11DL/12DL
	ccqLA|OA-A5-3	A05	45.21	44.9-45.6	2.88827	1.2836	4.5775	14WH
	ccqLA|OA-A5-4	A05	52.41	50.9-53.3	3.55446	1.8004	4.4768	12WH
	ccqLA|OA-A5-5	A05	57.81	57.4-59	4.47671	1.5917	6.9642	14WH
	ccqLA|OA-A5-6	A05	63.21	62.5-66.8	3.1682	1.3571	4.9923	14WH
	ccqLA|OA-A5-7	A05	76.11	71.1-79.7	2.80147	1.7261	4.1844	12WH
	ccqLA|OA-A6-1	A06	32.81	31.7-33.6	3.50021	-1.8426	4.7653	12WH
	ccqLA|OA-A6-2	A06	51.21	48-52.7	2.58447	-1.2415	3.6668	11HG
	ccqLA|OA-A6-3	A06	64.63	64.07-65.18	2.91865-6.23	-2.83--1.2428	3.5461-8.91	11DL/13WH/11HG
	ccqLA|OA-A6-4	A06	67.11	66.6-68	6.39933	-2.8523	9.139	13WH
	ccqLA|OA-A6-5	A06	74.85	74.27-75.43	2.68863-4.15	-2.3--1.2494	3.8302-6.11	11HG/13WH
	ccqLA|OA-A7-1	A07	8.91	6.8-10.7	4.05139	2.1908	9.0179	11WH
	ccqLA|OA-A7-2	A07	14.01	13.7-15.5	3.8409	1.7647	5.864	11WH
	ccqLA|OA-A7-3	A07	19.61	18.2-21.3	4.56785	1.8959	6.6318	11WH
	ccqLA|OA-A7-4	A07	68.41	67.6-72	4.05139	1.3324	4.8426	13DL
	ccqLA|OA-A7-5	A07	73.71	72.7-75.1	2.74939	1.0937	3.3186	13DL
	ccqLA|OA-A7-6	A07	125.81	125.6-126.8	3.78231	1.5471	5.8272	11HG
	ccqLA|OA-A8-1	A08	18.21	17.6-19.9	5.19064	-2.4977	7.3117	13WH
	ccqLA|OA-A8-2	A08	25.91	23.6-27.6	5.35122	-2.5715	7.5268	13WH
	ccqLA|OA-A8-3	A08	32.91	32.3-36.6	4.76098	-1.5101	6.1951	12DL
	ccqLA|OA-LA8-4	A08	38.71	38.5-42	3.36133	-1.2756	4.439	12DL
	ccqLA|OA-A8-5	A08	107.51	107-111.2	2.61702	-1.6431	3.6474	12WH
	ccqLA|OA-A8-6	A08	116.21	114.6-117.2	4.4485	-2.3543	7.4806	12WH
	ccqLA|OA-A9-1	A09	56.55	54.89-58.21	2.75-3.74108	1.25-2.6926	5.68-7.5152	14WH/14YL
	ccqLA|OA-A9-2	A09	62.01	60.3-64.4	2.99677	1.1871	4.4819	12WH
	ccqLA|OA-A9-3	A09	70.91	67-71.9	3.96676	1.3759	5.1296	13DL
	ccqLA|OA-A9-4	A09	73.81	71.97-75.64	3.55-7.39319	1.28-1.7854	4.24-10.1293	12DL/12WH
	ccqLA|OA-A9-5	A09	81.61	78.8-84.41	2.53-6.015	1.2121-1.80	3.39-10.66	12DL/13DL/12WH
	ccqLA|OA-A9-6	A09	127.01	123.9-127.5	2.72118	-1.8278	3.5525	13WH
	ccqLA|OA-A9-7	A09	128.91	127.5-129.6	2.78194	-1.0371	3.4202	12WH
	ccqLA|OA-A9-8	A09	134.91	132.7-135.5	3.05102	-1.8827	3.957	13WH
	ccqLA|OA-A9-9	A09	137.91	136.1-139.2	4.69588	-2.0024	7.0925	11WH
	ccqLA|OA-A9-10	A09	142.81	142.7-145.9	6.11072	-2.5831	8.9176	12WH
	ccqLA|OA-A9-11	A09	145.53	144.26-146.81	3.13782-6.76	-1.9315--2.37	4.0461-10	11WH/13WH
	ccqLA|OA-A9-12	A09	152.71	151.69-153.72	2.5823-7.83	-1.8031--1.283	5.8112-11.26	11WH/12WH/11GS
	ccqLA|OA-A10	A10	64.29	61.6-66.98	2.62-2.88827	-1.79--1.20	3.76-3.9	11DL/13WH/14WH/11HG
	ccqLA|OA-C1-1	C01	56.11	51.8-57.5	2.67127	-1.5338	4.5629	11HG
	ccqLA|OA-C1-2	C01	63.11	60.1-64.7	2.96422	-1.3874	4.3892	11HG
	ccqLA|OA-C1-3	C01	71.11	69.5-71.7	2.70382	-1.2985	3.8278	11HG
	ccqLA|OA-C1-4	C01	78.81	78-80.9	2.89261	-1.3973	4.096	11HG
	ccqLA|OA-C1-5	C01	87.31	86.3-89.4	4.34	1.8296	7.4657	14YL
	ccqLA|OA-C2-1	C02	63.21	62.8-64.3	3.35916	1.3024	4.029	12DL
	ccqLA|OA-C2-2	C02	67.31	67-67.4	3.10093	1.4301	5.0655	14WH
	ccqLA|OA-C2-3	C02	86.61	85.3-89.9	2.62136	1.0825	3.1979	12DL
	ccqLA|OA-C2-4	C02	110.01	106.1-111.8	2.74722	-1.7617	3.5568	13WH
	ccqLA|OA-C3-1	C03	22.61	21.6-23.6	4.57653	3.3651	20.324	13WH
	ccqLA|OA-C3-2	C03	47.91	43.9-49.7	2.52154	-1.6681	3.0522	11DL
	ccqLA|OA-C3-3	C03	61.01	58.4-61.2	6.73785	2.0413	9.0271	11DL
	ccqLA|OA-C3-4	C03	64.51	64.4-66.2	3.22028	1.4989	4.0197	12DL
	ccqLA|OA-C3-5	C03	69.61	69.2-69.8	5.43585	1.8544	7.4984	11DL
	ccqLA|OA-C3-6	C03	111.21	107.6-111.9	3.48502	1.6567	5.1895	11WH
	ccqLA|OA-C3-7	C03	117.81	112.5-122.3	4.47237	1.8931	6.5041	11WH
	ccqLA|OA-C3-8	C03	122.81	122.3-123.5	3.2333	1.6482	4.8633	11WH
	ccqLA|OA-C3-9	C03	153.91	152.5-157.4	4.26188	-2.3059	9.8845	11GS
	ccqLA|OA-C3-10	C03	168.71	163.2-178	2.65825	-1.2635	3.7691	11HG
	ccqLA|OA-C3-11	C03	178.91	178-179.1	4.96496	-2.2507	6.8451	12WH
	ccqLA|OA-C3-12	C03	185.81	184.7-190.8	3.21377	-1.643	4.6177	11WH
	ccqLA|OA-C3-13	C03	192.44	189.59-195.28	2.55-4.42897	-2.304--1.01	3.26-7.0553	11DL/11WH/12WH
	ccqLA|OA-C4-1	C04	84.91	81.5-87.7	2.50852	1.1642	3.6882	14WH
	ccqLA|OA-C4-2	C04	154.61	150.6-155.6	3.1465	-1.8694	4.0835	13WH
	ccqLA|OA-C5-1	C05	56.61	54.9-58.31	2.8427-5.08	1.3262-1.42	4.3432-6.82	12WH/11HG
	ccqLA|OA-C5-2	C05	66.35	65.77-66.94	3.46-5.12	1.49-1.68	5.29-6.66	11DL/12DL/11HG
	ccqLA|OA-C5-3	C05	69.8	68.64-70.96	4.15555-4.85	1.3032-1.54	5.6501-6.43	12DL/12WH
	ccqLA|OA-C5-4	C05	71.21	67.6-72.8	4.53964	1.4524	5.9361	13DL
	ccqLA|OA-C5-5	C05	76.35	75.87-76.82	2.93-4.27	1.21-1.47	4.49-5.74	11DL/12DL/12WH
	ccqLA|OA-C5-6	C05	78.51	77.2-80.1	4.62644	1.682	8.0005	13DL
	ccqLA|OA-C5-7	C05	161.51	152.7-164.1	4.94326	-1.8305	12.3516	08DL
	ccqLA|OA-C5-8	C05	167.71	164.1-168.7	3.94072	-1.6307	9.9569	08DL
	ccqLA|OA-C5-9	C05	181.71	177.8-184.4	2.60834	1.1746	3.1563	11DL
	ccqLA|OA-C7-1	C07	78.59	75.37-81.81	2.8-3.85392	-2.1553--1.19	3.38-5.4681	11DL/13WH
	ccqLA|OA-C7-2	C07	82.81	81.1-87.5	3.01413	-1.9042	4.2203	13WH
	ccqLA|OA-C8-1	C08	3.91	0-9.5	3.54578	-2.5924	13.1766	13WH
	ccqLA|OA-C8-2	C08	10.81	9.5-16.2	3.02498	-2.3277	11.4314	13WH
	ccqLA|OA-C8-3	C08	19.21	18.5-24.3	3.28321	2.1845	7.9467	08DL
	ccqLA|OA-C8-4	C08	65.61	52.9-69.8	2.78194	-1.0544	3.417	12WH
	ccqLA|OA-C9-1	C09	3.01	0-6.8	2.85355	1.6214	6.1016	12WH
	ccqLA|OA-C9-2	C09	13.37	13.06-13.68	3.55012-8.30	1.6521-2.26	5.3946-11.65	13DL/12WH/14WH/11HG
	ccqLA|OA-C9-3	C09	18.99	18.7-19.28	4.76749-10.45	1.63-2.45	6.24-14.36	12DL/13DL/14WH
	ccqLA|OA-C9-4	C09	27.16	26.78-27.54	2.55843-3.85	1.1508-1.55	3.4139-6.13	12DL/14WH
	ccqLA|ALA-A1-1	A01	2.61	0-4.5	2.54107	0.1473	3.4017	12DL
	ccqLA|ALA-A1-2	A01	22.41	19.26-25.55	2.55409-8.02	0.1159-0.32	2.8036-17.69	09DL/12DL/11HG/11GS
	ccqLA|ALA-A1-3	A01	58.81	55.2-59	2.80581	-0.1608	3.9038	11DL
	ccqLA|ALA-A2-1	A02	53.91	50.4-55.5	2.54541	-0.1706	3.3923	11WH
	ccqLA|ALA-A2-2	A02	65.21	64.3-66.5	2.70816	-0.1758	3.6117	11WH
	ccqLA|ALA-A3-1	A03	18.21	16.8-20.7	3.35265	0.1585	4.4653	12DL
	ccqLA|ALA-A3-2	A03	24.91	24-25.6	2.59749	-0.5113	4.7393	13WH
	ccqLA|ALA-A3-3	A03	27.61	25.8-29.2	2.8427	0.148	3.7918	12DL
	ccqLA|ALA-A3-4	A03	32.71	31.1-33.4	3.76929	0.2431	8.755	08DL
	ccqLA|ALA-A3-5	A03	36.61	36.2-36.8	4.14687	0.6499	7.5032	13WH
	ccqLA|ALA-A3-6	A03	41.51	40.7-43.6	2.65825	0.1682	4.8159	11GS
	ccqLA|ALA-A3-7	A03	73.81	71.9-80.1	2.50418	0.1691	3.3584	11WH
	ccqLA|ALA-A3-8	A03	94.81	92.9-101	4.17725	-0.2264	6.0445	11WH
	ccqLA|ALA-A3-9	A03	104.1	102.82-105.39	3.76-5.96533	-0.25--0.1791	5.39-7.207	09DL/12DL/11WH
	ccqLA|ALA-A3-10	A03	113.16	112.73-113.59	3.06404-5.69	-0.1744--0.17	4.7516-6.87	09DL/11HG
	ccqLA|ALA-A3-11	A03	113.51	113.1-114.1	3.19207	-0.1978	4.7315	11WH
	ccqLA|ALA-A5-1	A05	20.81	19.4-22.8	3.63475	-0.1903	5.6733	11HG
	ccqLA|ALA-A5-2	A05	33.61	32-36.6	5.29046	-0.263	7.7558	11WH
	ccqLA|ALA-A5-3	A05	39.01	38.4-39.1	5.1863	-0.2028	7.5445	12DL
	ccqLA|ALA-A5-4	A05	40.47	39.39-41.54	2.81232-5.25	-0.2212--0.19	5.2461-6.79	12WH/14YL
	ccqLA|ALA-A5-5	A05	45.88	45.59-46.16	2.81883-5.57	-0.2412--0.22	5.2643-8.16	12DL/14YL
	ccqLA|ALA-A5-6	A05	47.36	46.86-47.85	6.45--6.69445	-0.23--0.21	8.71-9.24	12DL/12WH
	ccqLA|ALA-A5-7	A05	56.51	55.5-57	4.84127	-0.18	6.3143	12WH
	ccqLA|ALA-A5-8	A05	77.11	64.4-77.7	2.97507	-0.1245	3.4414	09DL
	ccqLA|ALA-A6-1	A06	1.61	0-3.2	5.91542	0.3208	19.308	10GS
	ccqLA|ALA-A6-2	A06	3.21	2-3.7	4.88684	0.2062	6.5913	11DL
	ccqLA|ALA-A6-3	A06	6.81	4.5-7.4	4.68937	0.1574	5.5258	09DL
	ccqLA|ALA-A6-4	A06	7.41	6.2-9.9	8.24817	0.2274	11.6194	10DL
	ccqLA|ALA-A6-5	A06	11.21	10.8-16	3.92119	0.2517	13.5857	10GS
	ccqLA|ALA-A6-6	A06	16.51	15.89-17.13	3.64777-5.01	0.1783-0.179	4.9834-7.32	10DL/11DL
	ccqLA|ALA-A6-7	A06	52.7	52.22-53.18	2.68646-4.02	0.1831-0.216	3.5827-8.57	11WH/11GS
	ccqLA|ALA-A6-8	A06	62.91	62.2-63.2	4.9476	0.2348	10.3447	11GS
	ccqLA|ALA-A6-9	A06	64.41	63.7-65	2.83402	0.1223	3.1135	09DL
	ccqLA|ALA-A6-10	A06	117.81	112.3-123.2	2.9295	0.1672	4.256	11HG
	ccqLA|ALA-A7-1	A07	105.41	104-108.4	4.13819	0.1823	5.9747	12DL
	ccqLA|ALA-A7-2	A07	114.32	113.61-115.02	2.80364-4.28	0.1553-0.57	4.2381-8.82	12DL/14WH
	ccqLA|ALA-A7-3	A07	118.11	116.5-120.4	3.15735	0.1741	5.6163	12WH
	ccqLA|ALA-A7-4	A07	122.21	120.4-122.4	3.19641	0.2819	4.9481	13DL
	ccqLA|ALA-A7-5	A07	123.21	122.4-125.2	2.68429	0.5125	5.5878	14WH
	ccqLA|ALA-A8-1	A08	58.01	53.5-71.4	3.18773	-0.1472	4.8606	09DL
	ccqLA|ALA-A8-2	A08	77.61	65.7-83.3	2.84704	-0.1698	5.2883	11GS
	ccqLA|ALA-A9-1	A09	93.21	81.2-94.8	3.83656	-0.2045	7.801	11GS
	ccqLA|ALA-A9-2	A09	97.81	95.8-98.6	8.19392	-0.3298	13.0324	11WH
	ccqLA|ALA-A9-3	A09	99.01	98.7-101	3.59135	-0.198	7.3589	11GS
	ccqLA|ALA-A9-4	A09	109.01	108.4-114.3	4.21848	-0.2442	7.2144	11WH
	ccqLA|ALA-A9-5	A09	125.71	124.73-136.69	2.83-4.80	-0.22--0.14	4.07-7.64	09DL/10DL/12DL/12WH/11HG
	ccqLA|ALA-A9-6	A09	132	130.8-133.2	3.4-3.8843	-0.17--0.1436	4.5652-4.85	09DL/12DL
	ccqLA|ALA-A9-7	A09	136.46	135.84-137.07	4.91939-8.27	-0.2253--0.28	7.8145-11.885	11DL/11HG
	ccqLA|ALA-A9-8	A09	139.91	139.11-140.7	2.25463-8.2	-0.29--0.125	2.7087-12.08	09DL/11DL
	ccqLA|ALA-A9-9	A09	145.61	144.6-146.4	10.0124	-0.311	14.1286	11DL
	ccqLA|ALA-A10-1	A10	60.41	59-64.2	2.65391	-0.2485	4.4474	13DL
	ccqLA|ALA-A10-2	A10	64.87	62.56-67.19	4.85-5.63549	-0.2261--0.17	6.07-7.4622	09DL/11DL
	ccqLA|ALA-A10-3	A10	70.85	69.48-72.22	3.61-6.68794	-0.29--0.2	6.15-10.4908	09DL/10DL/13DL
	ccqLA|ALA-C1-1	C01	17.11	16.2-17.6	3.03149	0.1358	4.1524	10DL
	ccqLA|ALA-C1-2	C01	28.11	25.4-30.82	4.08828-4.3	0.1587-0.28	5.5436-15.8	10DL/10GS
	ccqLA|ALA-C1-3	C01	35.5	34.79-36.22	2.67-6.3364	0.13-0.3215	3.68-21.0119	10DL/10GS
	ccqLA|ALA-C1-4	C01	44.6	43.96-45.24	2.49984-2.96	0.1276-0.23	2.7765-10.9	09DL/10GS
	ccqLA|ALA-C1-5	C01	57.91	56.8-61.8	2.69731	0.1213	2.9565	09DL
	ccqLA|ALA-C2-1	C02	62.61	62.5-63	4.8608	0.1951	6.2749	12WH
	ccqLA|ALA-C2-2	C02	71.91	71-72.2	6.0977	0.2202	7.8299	12WH
	ccqLA|ALA-C2-3	C02	77.71	76.1-79.5	3.56965	0.1702	4.7127	12WH
	ccqLA|ALA-C2-4	C02	98.01	95.3-98.6	2.84704	0.152	3.795	12DL
	ccqLA|ALA-C3-1	C03	0.01	0-7	2.67561	-0.2463	4.4143	13DL
	ccqLA|ALA-C3-2	C03	134.91	133.7-138.4	3.73891	0.2375	11.3928	10GS
	ccqLA|ALA-C3-3	C03	151.81	149.1-153.3	3.2767	0.312	8.4072	08DL
	ccqLA|ALA-C4-1	C04	133.31	127.1-134.9	2.9946	0.1816	6.1278	11GS
	ccqLA|ALA-C4-2	C04	150.71	149.4-152.01	2.75-2.92733	0.1197-0.18	3.2142-3.95	09DL/11WH
	ccqLA|ALA-C5-1	C05	101.71	100.7-104.5	2.82968	0.1262	3.5609	10DL
	ccqLA|ALA-C5-2	C05	114.31	113.3-115	6.76172	0.1979	8.7245	09DL
	ccqLA|ALA-C5-3	C05	122.21	121.41-123	2.52-9.58923	0.18-0.2331	7.37-11.9943	09DL/10GS
	ccqLA|ALA-C5-4	C05	139.8	134.88-144.73	4.78-5.4033	0.2337-0.29	8.284-11.14	11GS/12DL
	ccqLA|ALA-C6	C06	55.51	55-55.9	2.63438	0.3032	4.177	13DL
	ccqLA|ALA-C7-1	C07	24.41	20-25.6	2.821	0.1464	3.7655	12DL
	ccqLA|ALA-C7-2	C07	93.21	87.5-101.9	4.30094	0.209	6.7646	11HG
	ccqLA|ALA-C9-1	C09	8.91	6.9-10.2	6.32772	-0.2363	8.437	12WH
	ccqLA|ALA-C9-2	C09	14.11	13.9-14.3	7.71869	-0.2421	10.0544	12WH
	ccqLA|ALA-C9-3	C09	20.31	20.1-20.9	6.79861	-0.2229	8.92	12WH
	ccqLA|EIA-A1-1	A01	2.01	0-3.6	3.21811	0.6913	7.0631	08DL
	ccqLA|EIA-A1-2	A01	11.31	10.3-20.9	3.64126	0.6958	7.4862	08DL
	ccqLA|EIA-A1-3	A01	22.21	12.2-22.4	2.51503	0.3617	3.3149	12WH
	ccqLA|EIA-A3-1	A03	89.01	87.7-89.2	2.6691	-0.4042	3.9955	12WH
	ccqLA|EIA-3-2	A03	98.21	94.7-102.9	5.99354	-0.5843	8.657	12WH
	ccqLA|EIA-3-3	A03	105.91	105-108.1	5.09082	-0.5373	7.4146	12WH
	ccqLA|EIA-A5	A05	19.41	18-20.1	2.65391	-0.3835	4.3384	13WH
	ccqLA|EIA-A6-1	A06	54.61	53.7-54.7	2.52371	0.378	4.1689	13WH
	ccqLA|EIA-A6-2	A06	65.21	63.5-66.6	3.53276	0.4458	5.7594	13WH
	ccqLA|EIA-A6-3	A06	67.11	66.6-68	2.50418	0.3708	3.5412	12WH
	ccqLA|EIA-A8-1	A08	16.11	14-17.6	3.63909	0.4507	5.2835	12WH
	ccqLA|EIA-A8-2	A08	25.91	24.1-27.6	4.56568	0.4992	6.4833	12WH
	ccqLA|EIA-A8-3	A08	34.61	33.6-35.6	3.31793	0.4209	4.7794	12WH
	ccqLA|EIA-A8-4	A08	115.21	115.2-117.2	4.15772	0.5532	7.6166	12WH
	ccqLA|EIA-A9-1	A09	134.51	134.5-134.9	7.8554	0.6742	11.6251	12WH
	ccqLA|EIA-A9-2	A09	142.11	139.9-142.6	8.03768	0.6858	11.8639	12WH
	ccqLA|EIA-A9-3	A09	149.81	149.1-150.8	6.49698	0.6189	9.8084	12WH
	ccqLA|EIA-C2	C02	112.21	111.6-113.8	2.94252	0.4194	4.6156	12WH
	ccqLA|EIA-C3-1	C03	173.61	163.4-176.4	3.00328	0.4171	4.9183	13WH
	ccqLA|EIA-C3-2	C03	183.21	182.9-183.6	2.73854	0.4067	4.4992	13WH
	ccqLA|EIA-C5-1	C05	80.51	77.8-81.3	2.81666	2.5878	5.7218	14WH
	ccqLA|EIA-C5-2	C05	100.01	93.9-100.7	4.33349	0.7471	8.9314	08DL
	ccqLA|EIA-C5-3	C05	103.21	101.7-105.5	4.48973	0.7615	9.2321	08DL
	ccqLA|EIA-C5-4	C05	104.51	102.5-105.5	3.29189	-3.143	6.7009	14WH
	ccqLA|EIA-C5-5	C05	110.71	108.8-113	2.96422	0.6246	6.2651	08DL
	ccqLA|EIA-C7-1	C07	63.61	62.2-64.1	2.92082	0.411	4.866	13WH
	ccqLA|EIA-C7-2	C07	72.11	68.9-78.2	3.41992	0.4389	5.6244	13WH
	ccqLA|EIA-C7-3	C07	79.21	78.2-81.9	2.77109	0.3944	4.5944	13WH
	ccqLA|EIA-C8	C08	49.21	45.8-50.9	2.59098	0.3827	4.264	13WH
	ccqLA|EA-A1-1	A01	0.01	0-4	2.6257	1.1607	3.3222	12WH
	ccqLA|EA-A1-2	A01	6.71	3.6-9.8	3.18339	1.4177	4.7517	11HG
	ccqLA|EA-A1-3	A01	18.99	16.03-21.95	3.13-3.61956	1.4951-1.51	4.33-6.0828	11DL/13WH
	ccqLA|EA-A1-4	A01	29.46	29-29.91	3.83-4.60908	1.5408-1.6	4.95-6.6616	11DL/13WH
	ccqLA|EA-A2-1	A02	54.41	53.9-54.7	3.09008	1.1325	4.2163	13DL
	ccqLA|EA-A2-2	A02	56.5	56.35-56.65	3.03149-4.6	1.2745-1.92	3.7463-10.52	12DL/11GS
	ccqLA|EA-A2-3	A02	66.26	65.38-67.15	3.47634-5.85	1.2-2.15	4.7347-13.12	10DL/13DL/11GS
	ccqLA|EA-A2-4	A02	73.11	68-75.2	5.30565	2.0796	13.5021	11GS
	ccqLA|EA-A2-5	A02	84	82.4-85.59	2.7559-3.5	1.0289-1.15	3.4649-5.29	10DL/11WH
	ccqLA|EA-A3-1	A03	20.71	19.5-22.8	2.69514	2.419	4.5372	14WH
	ccqLA|EA-A3-2	A03	44.41	43.6-45.5	2.65825	1.1544	3.3941	13DL
	ccqLA|EA-A3-3	A03	73.81	71.9-75.1	2.83619	1.0336	3.585	11WH
	ccqLA|EA-A3-4	A03	94.31	92.7-94.8	6.43839	-1.961	8.7612	12DL
	ccqLA|EA-A3-5	A03	98.6	96.53-100.68	2.99-6.77	-2.06--1.09	3.8-9.59	11DL/12DL/13DL/11WH/13WH/11HG
	ccqLA|EA-A3-6	A03	104.37	103.82-104.91	2.58013-6.84	-2.03--1.04	3.59-9.6	13DL/12WH/13WH/11GS
	ccqLA|EA-A3-7	A03	112.11	111.26-112.95	2.55626-6.05	-1.76--1.1132	3.5499-8.55	11DL/12WH
	ccqLA|EA-A3-8	A03	114.51	114.2-118.4	3.78014	-1.2121	4.7562	13DL
	ccqLA|EA-A3-9	A03	115.31	114.2-116.2	3.08791	-1.0525	4.692	10DL
	ccqLA|EA-A4	A04	0.01	0-5.1	2.70382	-1.2564	3.7943	11HG
	ccqLA|EA-A5-1	A05	22.21	20.6-22.8	3.689	-1.4598	5.0212	12DL
	ccqLA|EA-A5-2	A05	31.21	30.1-32.4	4.89986	-1.6675	6.5883	12DL
	ccqLA|EA-A5-3	A05	38.41	36.1-39.9	3.48936	-1.4269	4.7672	12DL
	ccqLA|EA-A5-4	A05	57.81	57.4-59	2.96205	-1.0615	4.4906	10DL
	ccqLA|EA-A6-1	A06	52.31	51.1-54.7	2.71684	1.1801	3.4291	12WH
	ccqLA|EA-A6-2	A06	55.61	54.8-55.9	3.20943	1.5237	4.3796	13WH
	ccqLA|EA-A6-3	A06	64.41	63.83-64.99	4.00148-6.12	1.3955-2.03	5.4143-8.15	11DL/13WH
	ccqLA|EA-A6-4	A06	65.61	65.2-66.6	3.11178	1.2341	3.9133	12WH
	ccqLA|EA-A7-1	A07	61.21	60.5-61.5	3.69334	-1.3382	5.3003	13DL
	ccqLA|EA-A7-2	A07	70.61	69.03-72.18	3.09876-5.9	-1.58--1.1288	4.2018-8.21	13DL/11WH
	ccqLA|EA-A7-3	A07	75.71	72.7-76.7	2.821	-1.0855	3.834	11WH
	ccqLA|EA-A7-4	A07	80.13	79.65-80.61	3.75-3.80401	-1.2808--1.23	5.04-5.4243	13DL/11WH
	ccqLA|EA-A7-5	A07	110.41	106.7-111.2	2.92082	-3.6254	5.4206	09DL
	ccqLA|EA-A8-1	A08	18.91	14.2-19.9	4.47671	1.7314	5.9733	13WH
	ccqLA|EA-A8-2	A08	24.89	22.74-27.03	2.95-5.30782	1.18-1.8729	3.72-7.0671	12WH/13WH
	ccqLA|EA-A8-3	A08	31.21	30.7-31.6	4.55266	1.7405	6.1321	13WH
	ccqLA|EA-A8-4	A08	32.91	31.6-36.5	7.42357	2.1063	10.2091	12DL
	ccqLA|EA-A8-5	A08	107.01	101.5-111.2	2.57579	1.0905	3.2295	11DL
	ccqLA|EA-A9-1	A09	59.86	57.52-62.19	2.6257-2.93	-1.2095--1.11	3.6699-3.98	13DL/11HG
	ccqLA|EA-A9-2	A09	72.29	69.97-74.6	3.36784-4.13	-1.52--1.2075	4.5667-5.05	12DL/13DL
	ccqLA|EA-A9-3	A09	79.61	77.6-86.7	2.92299	-1.4159	4.4936	12DL
	ccqLA|EA-A9-4	A09	129.3	128.85-129.74	2.76458-10.89	1.0502-2.47	3.517-15.82	13DL/12WH
	ccqLA|EA-A9-5	A09	134.7	134.14-135.26	5.8-10.66121	2.03-2.4654	7.96-15.5007	12WH/13WH
	ccqLA|EA-A9-6	A09	138.11	137.5-139.2	9.31581	2.3541	13.7876	12WH
	ccqLA|EA-A9-7	A09	140.41	140.16-140.66	3.2-10.09484	1.16-2.39	4.05-14.6694	11DL/13DL/11WH/12WH/13WH
	ccqLA|EA-A9-8	A09	142.11	140.6-142.6	5.30999	1.4653	8.3222	10DL
	ccqLA|EA-A9-9	A09	145.54	144.68-146.41	7.06-10.9	2.07-2.39	9.53-15.72	11DL/11WH/13WH
	ccqLA|EA-A9-10	A09	149.81	149.24-150.37	5.74-5.08214	1.451-1.93	8.0937-12.87	10DL/11GS
	ccqLA|EA-A10	A10	64.21	59.2-71.5	2.81232	1.1818	3.5178	11DL
	ccqLA|EA-C2-1	C02	110.01	106.1-111.8	3.24198	1.406	3.8864	13WH
	ccqLA|EA-C2-2	C02	116.81	113.8-120.1	2.54758	1.3468	3.5922	13WH
	ccqLA|EA-C3-1	C03	64.51	64.4-66.3	3.7541	-1.7597	4.6894	12DL
	ccqLA|EA-C3-2	C03	110.11	107.2-111.9	3.36567	-1.2168	4.8988	11WH
	ccqLA|EA-C3-3	C03	117.81	111.9-122.3	3.89732	-1.2741	5.253	11WH
	ccqLA|EA-C3-4	C03	124.71	123.5-128.3	2.54541	-1.033	3.4868	11WH
	ccqLA|EA-C3-5	C03	179.41	179.1-181.6	5.81994	1.795	8.0545	12WH
	ccqLA|EA-C3-6	C03	185.81	184.7-186.5	3.7975	1.3297	5.1437	11WH
	ccqLA|EA-C3-7	C03	191.09	188.67-193.51	2.58-4.57219	1.31-1.6475	4.17-6.7559	11WH/12WH/13WH/11GS
	ccqLA|EA-C4	C04	98.01	97.1-99.2	5.28395	1.6507	7.2416	12WH
	ccqLA|EA-C5-1	C05	35.11	28.1-41.4	2.80798	-1.1574	3.5418	12WH
	ccqLA|EA-C5-2	C05	66.23	65.78-66.67	2.68-4.95	-1.69--1.1	3.36-7.57	10DL/11DL/11HG
	ccqLA|EA-C5-3	C05	67.61	66.5-68.8	4.77183	-1.3241	7.3475	10DL
	ccqLA|EA-C5-4	C05	71.01	69.81-72.2	4.22499-6.17	-1.62--1.5742	5.7005-8.66	12DL/13DL
	ccqLA|EA-C5-5	C05	79.04	77.53-80.56	3.21377-5.54	-1.67--1.3915	4.4109-9.22	12DL/13DL
	ccqLA|EA-C5-6	C05	84.81	81.8-86.6	2.50635	-0.9692	3.1635	11WH
	ccqLA|EA-C5-7	C05	111.81	102.1-112.7	3.01847	-1.0653	3.7843	11WH
	ccqLA|EA-C5-8	C05	115.01	114.3-116.2	4.96713	-2.6968	18.8768	10GS
	ccqLA|EA-C5-9	C05	119.71	118.46-120.95	2.84-4.36387	-2.4968--1.03	3.56-16.8716	11WH/10GS
	ccqLA|EA-C6-1	C06	62.71	61.5-63.4	2.61051	-1.4509	3.1619	13WH
	ccqLA|EA-C6-2	C06	74.51	73.2-76	2.68863	-1.4173	3.2468	13WH
	ccqLA|EA-C9-1	C09	8.91	8.1-10.2	2.56928	-1.4009	3.4461	12DL
	ccqLA|EA-C9-2	C09	13.91	13.4-14.3	6.62067	-1.8964	9.6194	13DL
	ccqLA|EA-C9-3	C09	17.31	17.1-17.6	3.13565	-1.3481	4.2208	12WH
	ccqLA|EA-C9-4	C09	19.01	17.6-19.2	3.5154	-1.5289	4.6606	12DL
	ccqLA|EA-C9-5	C09	19.81	19.4-20.9	2.95554	-1.389	4.6128	11HG
	ccqLA|EA-C9-6	C09	21.91	21.9-23.2	6.42537	-1.8981	9.4177	13DL
	ccqLA|EA-C9-7	C09	25.71	25.3-27.3	2.61485	-1.2683	3.4967	12DL
	ccqLA|EA-C9-8	C09	29.91	27.6-34.1	5.12771	-1.7678	7.8115	11HG
	ccqLA|FAS-A1-1	A01	40.61	38.4-41.2	2.77109	0.0408	3.8994	13DL
	ccqLA|FAS-A1-2	A01	58.82	58.54-59.1	2.8-6.3581	0.047-0.0684	4.16-9.0833	10DL/11DL
	ccqLA|FAS-A1-3	A01	61.41	60.8-61.8	2.79713	0.0744	9.3767	10GS
	ccqLA|FAS-A1-4	A01	64.71	63.5-65.2	4.01884	0.079	12.6207	10GS
	ccqLA|FAS-A1-5	A01	68.61	67-69	4.88033	0.059	7.2113	10DL
	ccqLA|FAS-A1-6	A01	76.01	71.8-78	2.77543	0.0705	10.8196	10GS
	ccqLA|FAS-A1-7	A01	82.91	79.5-84.2	4.63078	0.0707	7.1971	11HG
	ccqLA|FAS-A2	A02	7.91	4.8-10.3	3.00979	0.0412	4.6397	09DL
	ccqLA|FAS-A3-1	A03	47.01	46.4-48.4	2.89044	0.0468	4.4521	13DL
	ccqLA|FAS-A3-2	A03	56.07	55.51-56.63	4.64814-4.88	0.0571-0.058	7.55-7.3701	09DL/13DL
	ccqLA|FAS-A4	A04	44.41	39.5-45.2	3.34614	-0.0593	4.5986	11HG
	ccqLA|FAS-A5-1	A05	0.01	0-4	4.6221	0.06	7.1274	11DL
	ccqLA|FAS-A5-2	A05	9.21	7.2-11.7	2.52371	0.0457	4.0763	11DL
	ccqLA|FAS-A5-3	A05	38.21	36.1-39.1	3.01847	0.0446	4.1779	10DL
	ccqLA|FAS-A6-1	A06	29.91	26.2-31.7	2.50635	0.0481	3.4213	11HG
	ccqLA|FAS-A6-2	A06	48.01	46.5-50.7	2.74071	0.0471	3.5909	10DL
	ccqLA|FAS-A6-3	A06	77.11	76.3-79.1	3.2333	-0.0655	9.8567	10GS
	ccqLA|FAS-A7-1	A07	15.51	13.7-16.2	2.604	-0.0377	3.8169	09DL
	ccqLA|FAS-A7-2	A07	19.21	18.5-20.6	4.71975	-0.0566	6.6089	10DL
	ccqLA|FAS-A7-3	A07	31.11	28.8-33.6	2.82534	-0.0444	4.0393	10DL
	ccqLA|FAS-A7-4	A07	106.21	105.5-106.9	2.56711	0.0538	4.7211	14YL
	ccqLA|FAS-A8-1	A08	31.17	30.73-31.6	2.90997-5.43	-0.07--0.0421	4.3591-8.59	13DL/11WH
	ccqLA|FAS-A8-2	A08	38.31	37.92-38.69	2.81883-7.2	-0.07--0.0411	4.214-10.97	13DL/11WH
	ccqLA|FAS-A8-3	A08	77.61	66-84.4	2.66042	0.0541	4.8839	14YL
	ccqLA|FAS-A9-1	A09	113.31	110.2-113.9	2.96205	0.0456	3.995	12DL
	ccqLA|FAS-A9-2	A09	117.11	115.1-117.2	3.94506	0.0546	6.0249	11DL
	ccqLA|FAS-A9-3	A09	119.71	117.4-120.1	3.45681	0.0493	4.6371	12DL
	ccqLA|FAS-A9-4	A09	126.14	125.46-126.81	4.30528-9.22	0.0571-0.083	6.5048-14.08	10DL/11DL/11HG
	ccqLA|FAS-A9-5	A09	133.06	132.48-133.63	3.669-10.78273	-0.05-0.0896	5.76-16.2233	10DL/11DL/13DL
	ccqLA|FAS-A9-6	A09	136.01	135.7-137.1	9.84529	0.0878	14.9456	10DL
	ccqLA|FAS-A9-7	A09	138.11	137.5-139.2	7.1176	0.0872	10.8288	11HG
	ccqLA|FAS-A9-8	A09	142.31	139.9-142.6	6.19969	-0.0665	9.525	13DL
	ccqLA|FAS-A9-9	A09	152.11	151.8-152.7	2.81015	-0.0444	4.4692	13DL
	ccqLA|FAS-C1	C01	51.11	47.7-52.2	2.54975	-0.0506	3.5523	11HG
	ccqLA|FAS-C2-1	C02	6.91	0-10.8	2.71901	0.0431	4.3213	13DL
	ccqLA|FAS-C2-2	C02	50.01	44.9-50.5	2.52805	0.0671	3.4688	11WH
	ccqLA|FAS-C2-3	C02	57.81	57.2-59.4	6.43622	-0.0731	10.1155	13DL
	ccqLA|FAS-C2-4	C02	62.61	62.31-62.9	3.92-4.68937	-0.06--0.057	5.79-7.3714	09DL/11WH
	ccqLA|FAS-C2-5	C02	63.91	63.2-64.2	7.05684	-0.0738	11.0523	13DL
	ccqLA|FAS-C2-6	C02	65.41	64.5-66.3	2.52805	-0.0909	6.0934	11GS
	ccqLA|FAS-C2-7	C02	68.25	67.6-68.89	3.48285-5.22	-0.06--0.0482	5.2762-8.31	09DL/10DL/13DL
	ccqLA|FAS-C2-8	C02	75.51	74.5-76	3.52842	-0.0545	4.9189	10DL
	ccqLA|FAS-C2-9	C02	78.65	77.07-80.22	2.69514-5.31	-0.0736--0.06	7.0346-7.22	12DL/11GS
	ccqLA|FAS-C2-10	C02	84.91	83.9-85.91	2.83836-5.11	-0.06--0.0453	4.0686-7.04	10DL/12DL
	ccqLA|FAS-C2-11	C02	87.51	86.6-89.6	3.25934	-0.076	8.4381	11GS
	ccqLA|FAS-C2-12	C02	92.41	92-94.8	4.56351	-0.0642	7.3571	11DL
	ccqLA|FAS-C2-13	C02	93.31	92.2-94.8	4.19461	-0.0567	5.7693	12DL
	ccqLA|FAS-C2-14	C02	102.01	100-104.4	4.57219	-0.0642	7.7799	11DL
	ccqLA|FAS-C3-1	C03	69.81	68.3-73.3	3.04234	-0.0553	4.4129	11HG
	ccqLA|FAS-C3-2	C03	75.99	74.82-77.15	2.65-3.02281	-0.0599--0.04	3.34-4.4775	12DL/11HG
	ccqLA|FAS-C4-1	C04	70.81	68.7-72.1	2.95337	-0.0645	5.4247	14YL
	ccqLA|FAS-C4-2	C04	74.41	73.5-74.6	3.64126	0.069	11.0456	10GS
	ccqLA|FAS-C4-3	C04	80.21	79.4-80.3	3.60003	0.0748	9.3859	11GS
	ccqLA|FAS-C4-4	C04	88.61	87.7-88.8	2.49984	0.0622	6.6376	11GS
	ccqLA|FAS-C4-5	C04	131.91	127.5-135.7	3.35265	-0.0505	5.0181	11DL
	ccqLA|FAS-C5-1	C05	110.71	108.8-112.7	4.90854	0.0692	7.3248	11HG
	ccqLA|FAS-C5-2	C05	120.61	117.5-121.7	3.26151	0.0573	4.9333	11HG
	ccqLA|FAS-C6-1	C06	60.91	60.8-61.5	3.5154	0.0651	5.1673	11HG
	ccqLA|FAS-C6-2	C06	68	67.04-68.97	4.12734-4.59	0.0688-0.0688	6.496-6.58	12DL/11WH
	ccqLA|FAS-C6-3	C06	74.51	73.2-78.1	3.76712	0.0604	5.4692	12DL
	ccqLA|FAS-C6-4	C06	79.8	78.8-80.81	2.52154-7.25	0.0533-0.11	3.2943-11.09	10DL/11WH
	ccqLA|FAS-C6-5	C06	79.81	79.2-81.8	7.46263	0.1004	10.4743	12DL
	ccqLA|FAS-C7-1	C07	35.71	34.4-40.7	2.90997	0.0448	3.8644	12DL
	ccqLA|FAS-C7-2	C07	44.91	43.4-47.2	4.04271	0.0606	5.9532	11WH
	ccqLA|FAS-C9-1	C09	21.91	20.9-24.8	2.74505	0.042	4.4369	09DL
	ccqLA|FAS-C9-2	C09	29.91	28.8-31.01	3.33-5.16243	0.05-0.0571	4.55-8.1411	09DL/12DL
	ccqLA|FAS-C9-3	C09	39.01	34-46.3	4.6655	0.0605	7.0222	12DL
ALA	ccqALA|PA-A5-1	A05	0.01	0-5.5	3.09659	0.0671	2.3356	12WH
	ccqALA|PA-A5-2	A05	7.21	7.1-11.1	3.15735	0.0741	2.5994	13WH
	ccqALA|PA-A5-3	A05	16.21	11.1-18	2.7776	0.0689	2.4805	12WH
	ccqALA|PA-A5-4	A05	19.41	18-20.3	3.80401	0.0814	3.1233	13WH
	ccqALA|PA-A7-1	A07	13.71	10.7-14.7	2.58447	-0.1112	4.587	14WH
	ccqALA|PA-A7-2	A07	19.21	16.2-21.3	2.51937	-0.1087	4.4232	14WH
	ccqALA|PA-A7-3	A07	112.21	112-113.2	5.31216	-0.1017	4.4743	12WH
	ccqALA|PA-A7-4	A07	115.51	114.8-119.5	5.49444	-0.1075	4.967	13WH
	ccqALA|PA-A7-5	A07	122.21	120.8-122.4	6.3147	-0.1056	5.2465	12WH
	ccqALA|PA-A8-1	A08	19.31	18.8-19.6	20.7539	-0.2209	22.3036	13WH
	ccqALA|PA-A8-2	A08	22.91	21.9-23.4	18.1369	-0.1865	17.9203	12WH
	ccqALA|PA-A8-3	A08	25.91	25.6-26.9	24.1499	-0.2335	24.7198	13WH
	ccqALA|PA-A8-4	A08	32.9	32.44-33.37	12.91367-18.52	-0.21--0.1549	12.466-20.02	12WH/13WH
	ccqALA|PA-A9-1	A09	94.81	92.3-98.7	2.71901	0.0688	2.0824	13WH
	ccqALA|PA-A9-2	A09	117.11	116.7-117.2	6.58595	0.1058	5.7491	12WH
	ccqALA|PA-A9-3	A09	126.81	126-127.4	8.49772	0.124	7.5383	12WH
	ccqALA|PA-A9-4	A09	136.21	135.8-136.8	7.59283	0.1158	6.5136	12WH
	ccqALA|PA-C2-1	C02	57.81	57.2-59.2	2.91648	-0.0796	2.2248	13WH
	ccqALA|PA-C2-2	C02	63.91	63.2-64.5	3.26802	-0.0814	2.4904	13WH
	ccqALA|PA-C2-3	C02	71.91	70.7-72.2	3.01847	-0.0741	2.2713	12WH
	ccqALA|PA-C2-4	C02	73.61	73.2-75.1	2.50852	-0.0719	1.9228	13WH
	ccqALA|PA-C3-1	C03	144.61	142.2-146.3	2.54324	-0.0608	6.6225	08DL
	ccqALA|PA-C3-2	C03	151.81	151.5-151.9	3.07055	-0.0948	7.9556	08DL
	ccqALA|PA-C3-3	C03	177.41	176.6-178	13.4063	-0.1708	13.476	12WH
	ccqALA|PA-C3-4	C03	183.51	182.9-183.6	17.3774	-0.1935	16.3571	13WH
	ccqALA|PA-C3-5	C03	184.41	184.1-184.7	16.5658	-0.1803	15.178	12WH
	ccqALA|PA-C3-6	C03	191.91	191-192.81	11.11-12.76828	-0.1707--0.17	12.37-13.6695	12WH/13WH
	ccqALA|PA-C5-1	C05	56.91	48.5-59	2.53673	-0.0575	5.9249	08DL
	ccqALA|PA-C5-2	C05	77.51	76.6-79.3	3.51757	-0.0718	2.6518	12WH
	ccqALA|PA-C6-1	C06	25.3	22.9-27.71	2.699-2.86223	0.0688-0.0731	2.1675-2.6657	12WH/13WH
	ccqALA|PA-C6-2	C06	50.11	46.7-51.6	2.72986	-0.0726	8.4446	08DL
	ccqALA|PA-C6-3	C06	57.21	55.5-58.4	2.52805	0.07	1.9397	13WH
	ccqALA|PA-C6-4	C06	61.31	60.7-61.5	3.255	0.0929	2.4775	12WH
	ccqALA|PA-C6-5	C06	63.41	62.5-63.7	2.74505	0.0815	2.0689	12WH
	ccqALA|PA-C6-6	C06	70.01	67.5-70.4	2.70165	0.074	2.0326	12WH
	ccqALA|PA-C9-1	C09	13.53	12.63-14.42	4.02535-4.822	0.0928-0.0957	3.3764-4.0827	12WH/13WH
	ccqALA|PA-C9-2	C09	21.51	21.12-21.89	5.4298-6.45792	0.104-0.1085	4.49-5.3624	12WH/13WH
	ccqALA|PA-C9-3	C09	27.31	26.7-27.6	3.72372	0.0868	3.1731	13WH
	ccqALA|SA-A2	A02	48.01	46.7-54.1	2.70165	-0.0284	2.7504	13WH
	ccqALA|SA-A8-1	A08	22.91	21.1-24.1	7.595	-0.0487	9.9355	12WH
	ccqALA|SA-A8-2	A08	25.91	24.7-27.6	14.9708	-0.0757	19.7876	13WH
	ccqALA|SA-A8-3	A08	33.04	31.9-34.18	6.2843-9.05758	-0.06--0.04	7.96-12.7066	12WH/13WH
	ccqALA|SA-A10	A10	71.71	71.4-72.7	4.21848	0.0356	5.1154	12WH
	ccqALA|SA-C1	C01	78.81	78.4-80	5.57473	-0.0778	10.7034	14WH
	ccqALA|SA-C2-1	C02	93.31	93.1-94.8	3.17254	-0.0364	3.531	12WH
	ccqALA|SA-C2-2	C02	113.81	112.5-114.8	2.57579	0.0275	3.0571	12WH
	ccqALA|SA-C3-1	C03	173.63	173.03-174.24	7.72737-8.09	-0.1544--0.0512	10-10.8449	12WH/13WH
	ccqALA|SA-C3-2	C03	182.91	180.4-183.5	12.4059	-0.0654	16.6009	12WH
	ccqALA|SA-C3-3	C03	184.41	184.1-189.4	11.9567	-0.0656	14.24	13WH
	ccqALA|SA-C3-4	C03	191.91	190.9-197.8	9.60442	-0.0631	12.8327	13WH
	ccqALA|SA-C4	C04	9.71	5.6-11	2.90346	-0.0628	7.5305	08DL
	ccqALA|SA-C5	C05	0.01	0-2.3	2.77326	-0.0296	2.9896	13WH
	ccqALA|SA-C7	C07	95.51	87.7-99.9	2.79279	-0.0521	7.234	08DL
	ccqALA|SA-C9-1	C09	5.01	0.7-7.6	4.38123	0.0452	6.8302	12WH
	ccqALA|SA-C9-2	C09	14.11	12.2-15.1	4.07526	0.0367	4.8964	12WH
	ccqALA|SA-C9-3	C09	63.81	61.9-64.7	6.70313	0.0462	7.5325	13WH
	ccqALA|SA-C9-4	C09	74.81	72.8-76.1	4.93892	0.0421	6.181	13WH
	ccqALA|OA-A1-1	A01	26.16	25.08-27.24	2.55-5.27	-2.76--1.4523	1.38-3.95	09DL/12DL/11GS
	ccqALA|OA-A1-2	A01	34.32	32.45-36.19	3.79-5.17979	-2.31--2.116	3.175-3.4219	09DL/11HG
	ccqALA|OA-A3-1	A03	91.81	89.4-92.7	2.80147	1.8802	2.074	11HG
	ccqALA|OA-A3-2	A03	98.66	95.13-102.18	4.19-4.49624	1.9-2.7617	2.36-3.3244	12DL/13WH
	ccqALA|OA-A3	A03	104.67	103.66-105.67	3.58-6.45	1.95-2.68	2.82-4.48	10DL/13DL/13WH
	ccqALA|OA-A3-4	A03	110.73	109.74-111.72	3.44-6.58	1.93-2.68	2.95-4.57	09DL/10DL/13DL
	ccqALA|OA-A4	A04	65.91	63.7-67.1	3.96459	-1.854	2.3721	09DL
	ccqALA|OA-A5-1	A05	16.21	14.7-18	3.8626	1.8371	2.6298	09DL
	ccqALA|OA-A5-2	A05	19.41	18.6-21.1	4.60908	2.7131	3.4265	13WH
	ccqALA|OA-A5-3	A05	27.61	24.4-29.3	2.61702	2.0713	1.9762	13WH
	ccqALA|OA-A5-4	A05	31.11	30.1-33.9	2.97507	1.5727	1.8308	09DL
	ccqALA|OA-A5-5	A05	40.21	39.9-41	4.14904	2.1358	2.855	13DL
	ccqALA|OA-A5-6	A05	47.21	46.6-47.5	4.60474	2.2818	3.1741	13DL
	ccqALA|OA-A5-7	A05	56.28	55.58-56.99	4.44-5.15809	2.24-2.7895	3.06-4.1149	13DL/12WH
	ccqALA|OA-A5-8	A05	60.91	59-61.7	4.3183	2.7202	3.9559	12WH
	ccqALA|OA-A5-9	A05	75.11	72.57-77.64	3.1-5.74	1.73-2.77	2.03-5.71	10DL/11DL/12DL
	ccqALA|OA-A5-10	A05	79.71	70.7-80.7	3.66947	1.7775	2.4286	09DL
	ccqALA|OA-A6-1	A06	0.01	-0.61-0.63	3.78-4.80438	-2.315--2.0	2.67-3.8573	10DL/11DL
	ccqALA|OA-A6-2	A06	5.41	4.28-6.53	3-5.6	-2.4556--1.59	1.68-4.42	10DL/11DL/12DL
	ccqALA|OA-A6-3	A06	11.21	9.9-13.6	5.04308	-2.3204	4.0047	10DL
	ccqALA|OA-A6-4	A06	16.01	12.7-19.8	4.20763	-1.8769	2.3335	12DL
	ccqALA|OA-A7-1	A07	10.54	8.53-12.55	2.62353-3.12	1.6422-1.828	1.8677-2.09	11DL/13DL
	ccqALA|OA-A7-2	A07	20.11	19.6-21.3	2.58013	1.3983	1.3371	12DL
	ccqALA|OA-A7-3	A07	114.51	113.6-115.5	2.81015	-4.5885	5.1546	14YL
	ccqALA|OA-A8-1	A08	15.11	14.1-16.1	22.5702	-5.4448	23.1014	09DL
	ccqALA|OA-A8-2	A08	24.88	24.67-25.1	5.79-40.3	-7.66--5.32	19.05-31.86	09DL/10DL/11DL/12DL/11WH/12WH/13WH/11HG/10GS/11GS
	ccqALA|OA-A8-3	A08	25.91	25.6-26.9	20.3915	-5.177	16.5007	13DL
	ccqALA|OA-A8-4	A08	29.81	29.62-29.99	6.41-28.62	-7.23--5.6	18.68-30.92	09DL/10DL/11WH/12WH/11HG/10GS/11GS
	ccqALA|OA-A8-5	A08	32.9	32.62-33.19	18.11-22.02984	-6.39--5.3929	18.4-19.7499	12DL/13WH
	ccqALA|OA-A8-6	A08	35.04	34.62-35.46	10.59-14.0616	-6.15--4.3601	12.1161-20.68	13DL/11GS
	ccqALA|OA-A9-1	A09	61.01	58.6-65	3.12914	3.1027	5.6515	14YL
	ccqALA|OA-A9-2	A09	148.21	147.2-149.8	3.15084	2.3941	9.4008	08DL
	ccqALA|OA-C2-1	C02	5.07	2.92-7.22	2.73-3.23	1.65-2.18	1.8-2.4	12DL/12WH/13WH
	ccqALA|OA-C2-2	C02	45.41	44.4-46.2	3.76495	3.2777	2.7265	12WH
	ccqALA|OA-C2-3	C02	57.81	57.2-58.7	3.41992	-2.4466	2.6871	12WH
	ccqALA|OA-C3-1	C03	177.22	176.83-177.62	4.14-24.3	-7.13--3.12	2.8-27.2	09DL/10DL/12WH/11HG/10GS/11GS
	ccqALA|OA-C3-2	C03	182.8	182.63-182.98	8.82-37.45	-7.58--5.5243	15.08-35.69	09DL/10DL/11DL/13DL/12WH/11GS
	ccqALA|OA-C3-3	C03	183.61	183.5-184	27.4679	-6.8546	26.4891	11HG
	ccqALA|OA-C3-4	C03	184.9	184.77-185.04	4.2-39.47	-7.53--4.41	13.74-35.5	09DL/10DL/11DL/12DL/13DL/11WH/12WH/13WH/10GS
	ccqALA|OA-C3-5	C03	192.16	191.36-192.96	3.02-26.13	-7.55--3.51	3.53-28.75	09DL/10DL/11WH/13WH/11HG/10GS/11GS
	ccqALA|OA-C4	C04	144.01	138.8-145.8	2.77326	-2.8705	4.2481	11GS
	ccqALA|OA-C5-1	C05	41.41	29.9-47.2	2.57579	1.8993	1.9754	11WH
	ccqALA|OA-C5-2	C05	57.91	49.7-61.1	3.43294	-2.3745	8.9387	08DL
	ccqALA|OA-C7-1	C07	97.81	96.1-99.9	5.40981	-2.9178	13.568	08DL
	ccqALA|OA-C7-2	C07	102.91	99.9-103.9	4.32698	-2.69	11.7235	08DL
	ccqALA|OA-C9-1	C09	13.31	12.53-14.08	2.83-5.55303	2.3-3.0742	2.05-4.4589	12WH/13WH
	ccqALA|OA-C9-2	C09	18.31	17.8-19.3	5.37075	2.9935	4.3123	12WH
	ccqALA|OA-C9-3	C09	21.91	21.9-23.3	2.18085	2.0841	1.615	13WH
	ccqALA|LA-A2-1	A02	59.11	57-59.5	2.75807	0.3389	1.393	12DL
	ccqALA|LA-A2-2	A02	59.91	59.5-60.3	2.88827	0.7347	4.4735	11GS
	ccqALA|LA-A2-3	A02	65.21	64.3-65.9	4.09045	0.7633	5.9295	11GS
	ccqALA|LA-A2-4	A02	74.61	74.1-75.9	4.12083	0.9266	7.4765	14WH
	ccqALA|LA-A2-5	A02	76.51	74.6-78	2.91431	0.6421	4.308	11GS
	ccqALA|LA-A2-6	A02	101.81	100.9-102.8	2.92082	0.4169	2.133	12WH
	ccqALA|LA-A3	A03	105.01	103.2-108	2.67344	0.5609	3.5438	11GS
	ccqALA|LA-A4	A04	8.71	5.3-10.1	2.83619	0.4635	2.0942	10DL
	ccqALA|LA-A5-1	A05	7.21	7.1-11.1	3.89298	0.4587	3.4797	13WH
	ccqALA|LA-A5-2	A05	15.21	13.9-18.6	4.78268	0.5082	4.2816	13WH
	ccqALA|LA-A5-3	A05	79.71	74-80.7	5.16894	0.8147	5.3745	11WH
	ccqALA|LA-A6-1	A06	0.01	0-2.8	2.64957	-0.3514	1.4287	12DL
	ccqALA|LA-A6-2	A06	46.71	45.7-47.7	2.59315	-0.3778	1.931	10DL
	ccqALA|LA-A7-1	A07	50.91	49.4-53.5	3.06621	0.3797	2.2191	12WH
	ccqALA|LA-A7-2	A07	118.11	117.06-119.15	3.17-5.35556	-0.6006--0.48	3.59-5.8509	12WH/13WH
	ccqALA|LA-A8-1	A08	17.11	16.1-17.6	13.1697	-0.8947	12.9088	12WH
	ccqALA|LA-A8-2	A08	19.91	18.9-21.1	4.43114	-0.9984	13.3567	10GS
	ccqALA|LA-A8-3	A08	23.02	22.52-23.51	17.77-29.34	-1.5948--1.02	16.88-26.6719	09DL/11DL/12WH
	ccqALA|LA-A8-4	A08	25.03	24.7-25.36	13.05-37.2	-1.56--1.3	14.67-28.24	10DL/12DL/11WH/11HG
	ccqALA|LA-A8-5	A08	26.08	25.66-26.5	11.68-17.80268	-1.02--1.35	21.75-14.8567	13DL/13WH/11GS
	ccqALA|LA-A8-6	A08	29.8	29.31-30.3	7.69265-17.42	-1.43--1.3389	23.03-23.9959	11WH/10GS
	ccqALA|LA-A8-7	A08	31.61	31.2-32	12.944	-1.3657	22.4281	11GS
	ccqALA|LA-A8-8	A08	32.84	32.51-33.17	6.92-18.52	-1.2256--0.88	9.5-19.87	10DL/11DL/12DL/13DL/13WH/10GS
	ccqALA|LA-A8-9	A08	55.14	48.51-61.76	2.38049-2.81	-0.5392-0.45	1.88-4.198	13DL/14WH
	ccqALA|LA-A9-1	A09	1.51	0-2.4	3.52625	-0.4501	2.2708	09DL
	ccqALA|LA-A9-2	A09	7.61	6.7-10.2	3.39388	-0.4278	2.1874	09DL
	ccqALA|LA-A9-3	A09	35.83	33.33-38.34	2.71467-4.02	-0.7142--0.49	2.89-6.7451	13DL/10GS
	ccqALA|LA-A9-4	A09	46.31	45.7-48.4	2.71033	-0.4197	1.8477	11DL
	ccqALA|LA-A9-5	A09	56.51	49.3-57.2	3.64126	-0.4865	2.4591	11DL
	ccqALA|LA-A9-6	A09	66.11	60-67	4.07309	-0.5265	2.8173	11DL
	ccqALA|LA-A9-7	A09	91.81	88.5-92.3	3.12697	0.4438	2.8076	13WH
	ccqALA|LA-A9-8	A09	97.21	95.2-98.7	4.45718	0.5042	4.1034	13WH
	ccqALA|LA-A9-9	A09	117.11	116.6-117.4	3.87996	0.5048	2.7032	11DL
	ccqALA|LA-A9-10	A09	126.81	125.79-127.82	3.03583-5.8	0.4378-0.7303	2.3504-4.2238	10DL/11DL/11WH
	ccqALA|LA-A9-11	A09	129.81	129.6-130.5	2.8861	0.4171	2.0848	13DL
	ccqALA|LA-A9-12	A09	132.71	131.4-133.6	4.43765	0.7371	4.3377	11WH
	ccqALA|LA-A9-13	A09	136.31	135.78-136.84	2.85-4.49407	0.3589-0.5579	1.467-3.1131	11DL/12DL/13DL
	ccqALA|LA-A9-14	A09	142.11	139.9-142.3	15.4374	0.9456	13.5717	12WH
	ccqALA|LA-A9-15	A09	142.91	142.6-145.5	3.02064	0.4378	2.1622	13DL
	ccqALA|LA-A10-1	A10	43.41	41.4-44.6	2.9295	0.4664	2.3513	10DL
	ccqALA|LA-A10-2	A10	49.42	47.79-51.05	2.53022-3.6933	0.4228-0.499	1.6118-2.949	10DL/11DL
	ccqALA|LA-A10-3	A10	58.42	57.04-59.8	2.5454-2.604	0.3721-0.4104	1.705-2.0927	09DL/10DL
	ccqALA|LA-C1-1	C01	47.11	44.9-48.4	2.56928	-0.3463	1.565	09DL
	ccqALA|LA-C1-2	C01	53.21	51.5-56.1	2.85138	-0.6826	5.3878	14YL
	ccqALA|LA-C2-1	C02	58.16	57.57-58.75	2.64957-4.977	-0.56--0.3875	1.9164-4.3053	12WH/13WH
	ccqALA|LA-C2-2	C02	63.91	63.34-64.47	2.56494-4	-0.5989--0.4807	2.4946-3.246	11WH/13WH
	ccqALA|LA-C2-3	C02	69.51	67.7-70.4	3.47634	-0.6927	3.3705	11WH
	ccqALA|LA-C2-4	C02	72.16	71.7-72.63	2.64523-3.728	-0.47--0.3975	1.9125-3.033	12WH/13WH
	ccqALA|LA-C2-5	C02	77.7	76.49-78.92	2.79713-2.81	-0.6296--0.41	2.06-2.7154	11WH/12WH
	ccqALA|LA-C3-1	C03	110.51	107.9-117.5	2.82317	-0.3524	2.0637	12WH
	ccqALA|LA-C3-2	C03	134.91	134.2-136	4.4702	-0.9689	11.2797	10GS
	ccqALA|LA-C3-3	C03	177.02	176.6-177.45	5.08-34.85	-1.6609--0.89	9.03-34.93	09DL/10DL/12WH/11HG/11GS
	ccqALA|LA-C3-4	C03	180.71	179.1-182	4.51577	-0.9475	11.3105	10GS
	ccqALA|LA-C3-5	C03	182.81	182.62-182.99	9.59-34.86	-1.77--1.08	15.75-35.42	09DL/13DL/11WH/12WH/13WH/11GS
	ccqALA|LA-C3-6	C03	183.4	183.2-183.61	22.37487-45.84	-1.86--1.3724	23.4014-39.75	10DL
	ccqALA|LA-C3-7	C03	184.46	184.32-184.61	21.29-44.49	-1.85--1.55	21.04-38.84	11DL/12DL/11WH/11HG
	ccqALA|LA-C3-8	C03	192	191.31-192.69	2.98-31.62	-1.76--0.66	2.01-33.67	09DL/11DL/12DL/11WH/12WH/13WH/10GS/11GS
	ccqALA|LA-C4	C04	79.41	79.3-80.4	4.2315	-0.5221	3.0722	13DL
	ccqALA|LA-C5-1	C05	72.91	71.5-73.5	4.38774	-0.5092	3.5196	10DL
	ccqALA|LA-C5-2	C05	74.51	73.5-76.6	3.24849	-0.4565	2.1727	11DL
	ccqALA|LA-C5-3	C05	77.51	76.57-78.44	3.7-4.3617	-0.5112--0.41	2.02-3.5381	10DL/12DL
	ccqALA|LA-C5-4	C05	86.61	85.8-87.7	2.70816	-0.3493	1.4882	12DL
	ccqALA|LA-C5-5	C05	93.01	89.3-94.2	2.77977	-0.3619	1.6797	09DL
	ccqALA|LA-C5-6	C05	101.71	100.3-103.6	3.20292	-0.3841	1.924	09DL
	ccqALA|LA-C5-7	C05	115.01	114.3-115.5	3.00979	0.3905	2.4612	13WH
	ccqALA|LA-C5-8	C05	135.01	125.7-138.5	5.26442	0.6101	5.8086	12WH
	ccqALA|LA-C5-9	C05	142.51	138.5-143.9	6.58161	0.6218	5.5879	12WH
	ccqALA|LA-C8	C08	24.51	19.2-32.5	2.84704	-0.3632	2.0781	12WH
	ccqALA|LA-C9-1	C09	13.31	11-13.9	5.7505	0.6185	5.3191	13WH
	ccqALA|LA-C9-2	C09	18.71	17.6-19.4	5.95448	0.6137	5.5008	13WH
	ccqALA|LA-C9-3	C09	21.51	20.9-21.9	7.32592	0.6714	6.6717	13WH
	ccqALA|LA-C9-4	C09	27.31	27.1-27.6	5.09299	0.5674	4.828	13WH
	ccqALA|EIA-A5-1	A05	19.41	18.6-20.3	5.75918	-0.7356	4.3878	13WH
	ccqALA|EIA-A5-2	A05	47.21	46.4-48	3.51323	-0.6222	3.2111	12WH
	ccqALA|EIA-A5-3	A05	54.61	52.4-56.9	4.19895	-0.66	3.6405	12WH
	ccqALA|EIA-A8-1	A08	23.61	21.9-24.1	18.6815	1.4993	19.1277	12WH
	ccqALA|EIA-A8-2	A08	25.91	25.6-26.8	22.1644	1.6041	20.1442	13WH
	ccqALA|EIA-A8-3	A08	31.21	31-32.3	18.2714	1.4936	19.0718	12WH
	ccqALA|EIA-A8-4	A08	34.61	33.3-35.2	16.6417	1.4024	15.982	13WH
	ccqALA|EIA-A9	A09	136.01	135.6-137.1	2.76024	-0.665	6.7078	08DL
	ccqALA|EIA-C2-1	C02	6.91	0-10.5	2.9295	-0.5536	2.3785	13WH
	ccqALA|EIA-C2-2	C02	57.81	56.9-59.2	2.50201	0.5272	1.7443	13WH
	ccqALA|EIA-C2-3	C02	110.61	107.4-111.8	2.58013	0.4922	1.7981	13WH
	ccqALA|EIA-C2-4	C02	116.81	114.2-120.1	2.5823	0.5482	2.3309	13WH
	ccqALA|EIA-C3-1	C03	157.71	153.4-158.2	3.4937	0.9417	6.2535	14WH
	ccqALA|EIA-C3-2	C03	164.31	162.9-174	4.04922	0.9963	7.2028	14WH
	ccqALA|EIA-C3-3	C03	176.01	174-176.4	18.8139	1.6244	22.4722	12WH
	ccqALA|EIA-C3-4	C03	182.81	182.56-183.05	24.96802-28.0168	1.8321-1.9059	27.2644-27.4857	12WH/13WH
	ccqALA|EIA-C3-5	C03	184.41	184.1-184.6	23.9156	1.7993	26.6297	12WH
	ccqALA|EIA-C3-6	C03	192.15	190.65-193.65	16.94119-21.3267	1.5867-1.808	20.5284-22.93	12WH/13WH
	ccqALA|EIA-C6	C06	39.51	32.2-45.1	2.49984	-0.4725	1.7363	13WH
	ccqALA|EIA-C7	C07	73.88	71.37-76.39	3.04451-4.012	0.5266-0.8362	2.2428-10.852	08DL/13WH
	ccqALA|EIA-C9-1	C09	13.31	12.2-13.9	3.60654	-0.6585	3.1148	12WH
	ccqALA|EIA-C9-2	C09	21.51	20.4-21.9	4.23367	-0.6812	3.6282	12WH
	ccqALA|EIA-C9-3	C09	21.91	21.9-23.3	2.48031	-0.5304	1.8502	13WH
	ccqALA|EA-A1-1	A01	25.52	24.49-26.55	2.97-5.36858	2.349-2.705	3.726-4.387	09DL/11WH/11GS
	ccqALA|EA-A1-2	A01	33.37	32.2-34.54	2.62787-5.2	2.26-2.5304	3.48-3.9018	09DL/11WH/11GS
	ccqALA|EA-A1-3	A01	37.48	35.17-39.79	2.83836-3.276	1.5138-2.115	1.3157-3.022	12DL/11WH
	ccqALA|EA-A1-4	A01	79.81	77.7-83.4	2.69514	-1.8587	2.4198	11WH
	ccqALA|EA-A1-5	A01	92.21	90-94.8	2.57362	-3.7839	8.2061	10GS
	ccqALA|EA-A3-1	A03	87.21	84.3-87.7	2.69514	-1.5859	1.3523	12DL
	ccqALA|EA-A3-2	A03	92.85	91.32-94.38	2.96856-3.8	-2.36--1.85	1.88-2.84	12DL/13WH/11HG
	ccqALA|EA-A3-3	A03	104.61	103.91-105.3	2.61-5.39	-2.76--1.81	1.87-4.74	09DL/10DL/13DL/13WH/11GS
	ccqALA|EA-A3-4	A03	111.11	110.24-111.97	2.57-6.21	-2.63--1.8321	2.2816-4	09DL/10DL/13DL/11GS
	ccqALA|EA-A5-1	A05	7.21	6.1-11.5	2.65174	-1.8342	1.9878	13WH
	ccqALA|EA-A5-2	A05	19.41	18.6-21	5.0561	-2.4998	3.7155	13WH
	ccqALA|EA-A5-3	A05	40.21	39.9-41.4	4.6004	-2.294	2.9716	13DL
	ccqALA|EA-A5-4	A05	47.21	46.6-47.5	5.45321	-2.5283	3.526	13DL
	ccqALA|EA-A5-5	A05	56.23	55.44-57.01	5-5.26876	-2.42--2.3205	3.236-3.928	13DL/12WH
	ccqALA|EA-A5-6	A05	62.71	62.1-66.2	4.09045	-2.0534	3.0881	12WH
	ccqALA|EA-A5-7	A05	75.11	72.85-77.36	3.2116-5.696	-2.5--2.0363	2.9657-3.5178	10DL/12DL
	ccqALA|EA-A6-1	A06	0.01	0-1.6	3.73023	2.0971	3.0232	10DL
	ccqALA|EA-A6-2	A06	3.21	2-3.7	3.99714	2.2934	2.8995	11DL
	ccqALA|EA-A6-3	A06	11.21	9.09-13.32	3.10093-5.14	1.7028-2.389	1.8994-4.077	09DL/10DL
	ccqALA|EA-A7-1	A07	10.71	7.5-12.3	3.46983	-1.9588	2.1715	13DL
	ccqALA|EA-A7-2	A07	68.41	64.1-72.7	3.07272	-1.6229	1.4302	12DL
	ccqALA|EA-A8-1	A08	13.12	11.33-14.91	2.91-15.26161	4.08-6.2185	10.03-20.0313	11HG/10GS
	ccqALA|EA-A8-2	A08	24.05	23.7-24.41	3.85-29.94	4.66-7.02	13.04-28.5	09DL/10DL/11WH/12WH/11HG/10GS/11GS
	ccqALA|EA-A8-3	A08	25.9	25.65-26.16	22.44-40.44	5.56-7.40	17.26-30.39	11DL/12DL/13DL/13WH
	ccqALA|EA-A8-4	A08	27.91	27.48-28.33	18.97665-26.94	4.7693-6.03	16.8785-23.75	12WH
	ccqALA|EA-A8-5	A08	31.21	30.2-31.6	14.6084	6.5211	27.4354	11GS
	ccqALA|EA-A8-6	A08	32.9	32.57-33.24	15.26378-18.84	4.6752-5.69	12.594-18.789	13DL/13WH
	ccqALA|EA-A8-7	A08	34.61	33.6-35.7	10.3531	3.8177	11.5101	11WH
	ccqALA|EA-A8-8	A08	38.71	38.5-42.7	8.4413	5.1966	17.254	11GS
	ccqALA|EA-A9-1	A09	61.01	58.6-65	2.81015	-3.4611	5.1179	14YL
	ccqALA|EA-A9-2	A09	158.91	155.7-160.9	2.67127	-2.2187	7.6952	08DL
	ccqALA|EA-A10	A10	49.41	47.6-50.6	2.64306	-1.6836	1.6437	09DL
	ccqALA|EA-C2-1	C02	4.91	1.1-9.9	3.4503	-1.8236	2.3923	12WH
	ccqALA|EA-C2-2	C02	45.41	42.9-46	3.8626	-2.7294	2.6081	12WH
	ccqALA|EA-C2-3	C02	57.81	57.2-58.6	4.35519	2.2816	3.2236	12WH
	ccqALA|EA-C3-1	C03	107.71	105.7-110.5	3.22679	-1.9304	2.9654	11WH
	ccqALA|EA-C3-2	C03	116.51	111.2-117.8	4.23367	-2.218	3.8564	11WH
	ccqALA|EA-C3-3	C03	124.71	123.5-125.6	3.53059	-2.067	3.232	11WH
	ccqALA|EA-C3-4	C03	161.31	158.2-162.9	4.03186	3.5201	7.2007	14WH
	ccqALA|EA-C3-5	C03	176.41	175.93-176.88	3.34-22.87	3.99-6.12	9.74-24.57	10DL/10GS11HG/11GS
	ccqALA|EA-C3-6	C03	182.81	182.66-182.95	7.36-36.71	4.53-7.99	11.86-33.35	09DL/10DL/13DL/12WH/13WH/11GS
	ccqALA|EA-C3-7	C03	183.61	183.5-184.1	20.8928	6.7602	22.0826	11HG
	ccqALA|EA-C3-8	C03	184.41	184.3-184.6	35.9092	7.9175	33.5196	11DL
	ccqALA|EA-C3-9	C03	185.51	185.28-185.73	3.2-41.81	4.13-7.89	10.8-33.2	09DL/10DL/12DL/11WH/12WH/10GS
	ccqALA|EA-C3-10	C03	192.03	191.32-192.73	2.74-32.2	3.99-7.44	3.94-28.48	09DL/11DL/12DL/13DL/11WH/12WH/13WH/11HG/10GS/11GS
	ccqALA|EA-C3-11	C03	200.71	190.9-208.7	2.62353	3.4716	5.3805	14YL
	ccqALA|EA-C7	C07	87.51	82-87.7	3.93204	2.3894	9.8212	08DL
	ccqALA|EA-C9-1	C09	13.31	12.2-13.4	6.4883	-2.7472	4.9117	12WH
	ccqALA|EA-C9-2	C09	13.31	11-13.9	3.31576	-2.1915	2.3701	13WH
	ccqALA|EA-C9-3	C09	18.71	18-19.2	6.19752	-2.6337	4.6983	12WH
	ccqALA|EA-C9-4	C09	21.51	20.9-23.2	5.95665	-2.5547	4.5415	12WH
	ccqALA|EA-C9-5	C09	28.71	27.6-39.3	2.81666	-2.2344	2.4279	11HG
	ccqALA|FAS-A1-1	A01	87.01	85.6-94.8	2.57796	0.1051	7.4849	10GS
	ccqALA|FAS-A1-2	A01	101.21	97.8-102.5	3.33963	0.0967	5.1815	11GS
	ccqALA|FAS-A3-1	A03	52.31	51-52.6	2.63221	0.0621	2.4934	13DL
	ccqALA|FAS-A3-2	A03	56.01	54.5-57.9	3.3635	0.0697	3.1503	13DL
	ccqALA|FAS-A3-3	A03	111.11	109.4-112.1	2.61919	0.0551	2.2968	13DL
	ccqALA|FAS-A3-4	A03	112.11	111.1-112.6	3.60437	0.0995	5.602	11GS
	ccqALA|FAS-A3-5	A03	121.51	119.1-121.8	2.82968	0.1067	8.3164	10GS
	ccqALA|FAS-A4-1	A04	8.11	5.3-8.5	2.97941	0.0667	2.1362	10DL
	ccqALA|FAS-A4-2	A04	44.41	41.5-45.1	4.11432	-0.1006	4.4383	11HG
	ccqALA|FAS-A4-3	A04	48.61	46.9-49.3	2.87742	-0.0621	2.5243	13DL
	ccqALA|FAS-A5-1	A05	0.01	0-5.5	2.87742	0.0603	2.1811	11DL
	ccqALA|FAS-A5-2	A05	19.41	18-20.1	2.92516	0.0583	2.5672	13DL
	ccqALA|FAS-A6	A06	116.11	112.8-121.2	4.20329	-0.0834	3.2778	11WH
	ccqALA|FAS-A7	A07	0.01	0-1.3	2.87959	-0.061	2.3556	09DL
	ccqALA|FAS-A8-1	A08	16.11	15.58-16.63	11.78093-17.19	-0.1698--0.164	15.0377-16.41	10DL/11HG
	ccqALA|FAS-A8-2	A08	18.91	17.4-19.3	9.19212	-0.175	17.5933	11GS
	ccqALA|FAS-A8-3	A08	21.91	20.87-22.94	15.79-22.62442	-0.1806--0.15	17.67-19.9521	12DL/13DL
	ccqALA|FAS-A8-4	A08	23.76	22.98-24.55	15.20-20.59	-0.19--0.1522	18.63-19.2531	09DL/11DL/11HG
	ccqALA|FAS-A8-5	A08	25.9	25.13-26.68	11.82-21.99078	-0.19--0.1791	20.0862-21.622	10DL/11GS
	ccqALA|FAS-A8-6	A08	27.71	25.1-28.8	17.4967	-0.1577	19.0801	13DL
	ccqALA|FAS-A8-7	A08	31.21	31-31.4	17.4208	-0.1656	16.6675	11DL
	ccqALA|FAS-A8-8	A08	33.03	32.48-33.58	4.7327714.86	-0.15--0.1464	14.565-15.5223	10DL/10GS
	ccqALA|FAS-A8-9	A08	34.6	33.8-35.41	13.846-17.57917	-0.1907--0.14	15.64-17.4549	13DL/11WH
	ccqALA|FAS-A9-1	A09	35.61	32.8-40.6	2.90346	-0.059	2.669	13DL
	ccqALA|FAS-A9-2	A09	97.81	90.4-101	2.59966	0.0669	2.0656	11WH
	ccqALA|FAS-A9-3	A09	35.61	32.79-40.6	4.81523-5.05	0.0806-0.0809	3.8881-3.9	10DL/11DL
	ccqALA|FAS-A9-4	A09	120.12	119.51-120.73	3.22896-6.27	0.057-0.117	2.6344-7.03	09DL/11HG
	ccqALA|FAS-A9-5	A09	125.96	125.04-126.98	3.23113-7.19	0.0578-0.13	2.6456-8.03	09DL/10DL/11DL/11HG
	ccqALA|FAS-A9-6	A09	132.22	131.47-132.96	3.28321-6.74	0.058-0.09	2.6767-5.32	09DL/10DL/11DL/12DL
	ccqALA|FAS-A9-7	A09	136.04	135.58-136.49	5.66587-7.09	0.0879-0.094	4.4985-5.24	10DL/12DDL
	ccqALA|FAS-A10-1	A10	43.41	42.3-47.1	3.99931	0.0755	3.4562	13DL
	ccqALA|FAS-A10-2	A10	49.41	47.6-52.6	2.81666	0.061	2.4749	13DL
	ccqALA|FAS-A10-3	A10	62.45	60.21-64.69	2.8427-2.88	0.0558-0.061	2.28-2.408	09DL/10DL
	ccqALA|FAS-A10-4	A10	70.79	69.6-71.99	3.28538-5.03	0.0676-0.083	3.2724-4.57	09DL/10DL/13DL
	ccqALA|FAS-C1-1	C01	57.51	56.4-62.1	2.99894	-0.06	2.8017	13DL
	ccqALA|FAS-C1-2	C01	67.11	65.3-68	2.91648	-0.0598	2.7115	13DL
	ccqALA|FAS-C2-1	C02	57.8	57.13-58.48	2.9946-5.17	-0.09--0.065	2.1475-4.95	10DL/13DL
	ccqALA|FAS-C2-2	C02	62.31	60.3-63.9	2.9295	-0.1251	8.9235	10GS
	ccqALA|FAS-C2-3	C02	62.61	62.3-62.9	5.47057	-0.1624	5.6163	11WH
	ccqALA|FAS-C2-4	C02	63.91	63.3-64.4	5.51831	-0.0888	5.2897	13DL
	ccqALA|FAS-C2-5	C02	65.81	64.5-66.3	3.04885	-0.087	3.2957	11HG
	ccqALA|FAS-C2-6	C02	68.31	67.93-68.68	2.51503-5.53	-0.1--0.0527	1.9401-4.38	09DL/10DL/11DL/13DL/11WH
	ccqALA|FAS-C2-7	C02	69.51	69.3-70.4	5.52048	-0.0886	4.0585	12DL
	ccqALA|FAS-C2-8	C02	71.2	70.9-71.51	5.40981	-0.091	4.1821	11DL
					4.71324	-0.1098	4.8625	11WH
	ccqALA|FAS-C2-9	C02	72.62	71.91-73.34	2.77-4.96496	-0.0869--0.06	2.21-3.6547	09DL/12DL/11HG
	ccqALA|FAS-C2-10	C02	78.32	77.53-79.12	2.71-5.31	-0.0892--0.06	2.08-3.9288	11DL
	ccqALA|FAS-C2-11	C02	83.01	82.9-83.6	2.93818	0.113	2.7923	11WH
	ccqALA|FAS-C2-12	C02	84.91	83.2-87.5	3.08791	-0.0626	2.3371	12DL
	ccqALA|FAS-C2-13	C02	96.81	94.8-98.7	2.72118	-0.0554	2.2322	09DL
	ccqALA|FAS-C3-1	C03	71.71	69.8-73.7	2.75373	-0.0829	3.8089	11GS
	ccqALA|FAS-C3-2	C03	176.4	176.08-176.73	12.13-25.66459	-0.21--0.17	14.26-26.8489	09DL/10DL/11HG
	ccqALA|FAS-C3-3	C03	180.71	179.4-182.4	20.9318	-0.1913	21.4067	10DL
	ccqALA|FAS-C3-4	C03	182.81	182.76-182.85	6.22-30.54275	-0.2369--0.15	11.69-31.2821	11DL11WH/11GS
	ccqALA|FAS-C3-5	C03	183.54	183.3-183.78	13.38-28.23604	-0.2121--0.16	15.55-26.3921	12DL/13DL/11HG
	ccqALA|FAS-C3-6	C03	185.56	185.27-185.86	27.2335-30.36	-0.235--0.2079	25.4227-31.13	11DL/12DL
	ccqALA|FAS-C3-7	C03	192.79	191.34-194.23	2.52-24.46024	-0.2262--0.11	8.77-26.7873	11DL/10GS/11GS
	ccqALA|FAS-C5-1	C05	77.51	76.7-79.6	3.91902	-0.069	3.0665	10DL
	ccqALA|FAS-C5-2	C05	169.21	167.7-173.8	2.89478	0.0577	2.0457	12DL
	ccqALA|FAS-C6-1	C06	13.91	11.1-16.3	2.604	0.0528	1.7629	12DL
	ccqALA|FAS-C6-2	C06	20.51	16.3-21.3	2.87091	0.0548	1.9158	12DL
	ccqALA|FAS-C6-3	C06	42.01	41.5-45.6	3.10961	0.0802	2.8956	11WH
	ccqALA|FAS-C6-4	C06	54.41	54.3-55	7.80115	0.1621	7.0799	11WH
	ccqALA|FAS-C6-5	C06	60.11	59.7-60.2	5.53133	0.1228	5.0958	11WH
	ccqALA|FAS-C6-6	C06	62.11	61.7-62.7	4.42463	0.1009	4.0723	11WH
	ccqALA|FAS-C8-1	C08	95.61	93.2-98.3	2.89044	-0.0606	2.0542	11DL
	ccqALA|FAS-C8-2	C08	103.21	101.7-104.4	2.89478	-0.0609	2.0595	11DL
	ccqALA|FAS-C8-3	C08	109.41	105.9-111.8	3.44162	-0.0714	2.421	11DL
	ccqALA|FAS-C9-1	C09	60.21	51.9-60.9	2.76458	0.0543	1.8481	12DL
	ccqALA|FAS-C9-2	C09	65.91	61.8-73.3	3.26802	0.0587	2.1632	12DL
EIA	ccqEIA|PA-A1-1	A01	22.21	19-22.4	4.60257	0.0621	6.475	13WH
	ccqEIA|PA-LA1-2	A01	74.01	72.4-76.7	2.72986	-0.0658	7.2743	08DL
	ccqEIA|PA-A5-1	A05	55.51	53.3-56.5	2.51503	-0.0458	3.5378	13WH
	ccqEIA|PA-A5-2	A05	63.51	62.7-68	3.63692	-0.0547	5.0487	13WH
	ccqEIA|PA-5-3	A05	71.11	70.7-77.4	2.8427	-0.0483	3.9797	13WH
	ccqEIA|PA-A6	A06	64.41	63.8-65.6	4.49407	0.0602	6.3174	13WH
	ccqEIA|PA-A7-1	A07	97.21	91.9-97.5	7.6818	-0.0814	10.0635	12WH
	ccqEIA|PA-A7-2	A07	106.91	106.2-109.4	2.74722	-0.0454	3.5674	13WH
	ccqEIA|PA-A7-3	A07	107.91	105.4-109	4.75013	-0.068	6.896	12WH
	ccqEIA|PA-A9-1	A09	127.01	125.9-128.1	5.34905	0.0696	7.2613	12WH
	ccqEIA|PA-A9-2	A09	138.11	137.5-139	9.0706	0.0891	11.8669	12WH
	ccqEIA|PA-C2-1	C02	63.21	62.7-63.9	3.77146	-0.0577	4.3642	12WH
	ccqEIA|PA-C2-2	C02	67.41	67-69.5	2.99894	-0.0529	3.5015	12WH
	ccqEIA|PA-C2-3	C02	89.51	86.6-91.3	2.94252	-0.0771	4.7475	12WH
	ccqEIA|PA-C2-4	C02	104.41	104.1-108.3	2.82751	0.048	3.5065	12WH
	ccqEIA|PA-C2-5	C02	114.81	113.8-119.1	3.37652	0.0519	4.6762	13WH
	ccqEIA|PA-C2-6	C02	120.11	119.1-121.1	2.67344	0.0462	3.7593	13WH
	ccqEIA|PA-C3-1	C03	105.11	102.3-106.6	4.4051	-0.0616	5.9984	12WH
	ccqEIA|PA-C3-2	C03	110.51	108.1-111.9	3.35699	-0.051	4.3409	13WH
	ccqEIA|PA-C3-3	C03	114.81	113.8-118.1	7.88361	-0.0816	10.3467	12WH
	ccqEIA|PA-C3-4	C03	117.81	111.9-122.3	3.23113	-0.0495	4.1714	13WH
	ccqEIA|PA-C3-5	C03	120.31	118.1-122.8	7.76426	-0.0814	10.3873	12WH
	ccqEIA|PA-C3-6	C03	122.81	122.3-124.7	2.94035	-0.0481	3.8281	13WH
	ccqEIA|PA-C3-7	C03	132.11	130.4-134.9	2.7776	-0.0462	3.6108	13WH
	ccqEIA|PA-C4-1	C04	141.71	134.3-148.1	3.50889	0.0503	4.5178	13WH
	ccqEIA|PA-C4-2	C04	149.51	148.1-152.6	2.58447	0.0435	3.3641	13WH
	ccqEIA|PA-C5-1	C05	15.31	11.9-20.4	4.14687	0.0678	7.8626	14WH
	ccqEIA|PA-C5-2	C05	56.41	52.02-60.8	3.32661-4.88	-0.0695--0.06	7.06-7.7507	08DL
								13WH
	ccqEIA|PA-C5-4	C05	65.21	64.9-66	6.1411	-0.0704	8.7872	13WH
	ccqEIA|PA-C5-5	C05	70.31	69.7-72.8	5.16243	-0.0647	7.45	13WH
	ccqEIA|PA-C6	C06	49.11	44.9-51.1	2.66693	-0.0728	6.173	08DL
	ccqEIA|PA-C7	C07	71.61	68.4-79.2	2.95554	0.0462	3.8275	13WH
	ccqEIA|SA-A6-1	A06	48.91	48.4-50.1	3.29406	0.0766	9.5322	08DL
	ccqEIA|SA-A6-2	A06	99.71	99.1-101.2	3.82788	-0.0359	7.0646	14WH
	ccqEIA|SA-A9	A09	17.91	13.3-18.9	2.9295	0.0326	5.2913	14WH
	ccqEIA|SA-C2	C02	118.01	117.2-119.1	4.89986	0.0365	8.5334	12WH
	ccqEIA|SA-C3	C03	73.31	69.8-73.7	2.90563	0.0269	4.7324	13WH
	ccqEIA|SA-C5	C05	34.81	27-39.1	2.53022	-0.0251	4.0645	13WH
	ccqEIA|SA-C9	C09	63.81	62.1-64.7	3.56965	0.0295	5.8002	13WH
	ccqEIA|OA-A3-1	A03	0.01	0-1.7	3.06838	-1.9961	8.1815	08DL
	ccqEIA|OA-A3-2	A03	9.41	8.9-9.9	5.25791	2.6578	9.5867	14WH
	ccqEIA|OA-A3-3	A03	20.71	20.4-22.8	3.26151	-2.0763	5.7802	14WH
	ccqEIA|OA-A3-4	A03	25.81	24.9-26.2	2.56711	-1.4406	4.5876	14WH
	ccqEIA|OA-A3-5	A03	102.91	100.7-104.1	4.41595	0.8061	6.7703	12WH
	ccqEIA|OA-A3-6	A03	104.81	104.1-107.4	5.07563	1.1038	8.1523	13WH
	ccqEIA|OA-A3-7	A03	112.11	111.39-112.82	4.57-6.50783	0.9607-1.05	7.38-9.7334	12WH
								13WH
	ccqEIA|OA-A3-8	A03	121.51	121-122.2	3.83005	0.7413	5.9112	12WH
	ccqEIA|OA-A6-1	A06	44.41	42.3-46.2	4.60474	-1.2079	9.4647	13WH
	ccqEIA|OA-A6-2	A06	50.11	49.4-50.4	4.48973	-1.0685	7.1471	13WH
	ccqEIA|OA-A6-3	A06	58.01	57-62	4.4268	-1.0675	7.0505	13WH
	ccqEIA|OA-A9-1	A09	29.81	27.6-36.3	3.04234	-0.6447	4.3779	12WH
	ccqEIA|OA-A9-2	A09	47.51	46.9-48.4	2.70165	0.8178	4.3232	13WH
	ccqEIA|OA-A9-3	A09	57.21	56.5-60.4	3.81052	0.9919	6.0268	13WH
	ccqEIA|OA-A9-4	A09	142.31	140.6-142.6	5.9892	0.9431	8.8728	12WH
	ccqEIA|OA-A9-5	A09	148.21	146.9-148.8	4.25537	0.9075	8.7592	12WH
	ccqEIA|OA-A10	A10	6.21	5.7-7.8	4.42463	-1.1248	6.9921	13WH
	ccqEIA|OA-C3	C03	123.51	122.8-125	2.93384	-0.6438	4.2399	12WH
	ccqEIA|OA-C4	C04	4.81	0-9.7	2.72986	-2.2044	7.1989	08DL
	ccqEIA|OA-C5-1	C05	80.51	80.2-81.5	3.70202	0.7414	5.5364	12WH
	ccqEIA|OA-C5-2	C05	85.61	83.3-85.8	4.84344	0.8254	7.1284	12WH
	ccqEIA|OA-C5-3	C05	94.21	93-95.6	4.18593	0.7666	6.1962	12WH
	ccqEIA|LA-A1	A01	22.21	11.9-22.4	4.13385	0.3526	5.0547	13WH
	ccqEIA|LA-A3-1	A03	104.81	103.2-106.5	3.88647	-0.3364	4.5979	12WH
	ccqEIA|LA-A3-2	A03	111.11	109.2-112.6	3.87996	-0.3349	4.6018	12WH
	ccqEIA|LA-A6-1	A06	48.01	46.9-50.1	2.88176	0.3372	5.2081	14WH
	ccqEIA|LA-A6-2	A06	53.91	53.6-54.7	4.31613	0.3703	5.6872	13WH
	ccqEIA|LA-A6-3	A06	64.41	63.9-64.9	7.77511	0.4827	9.9447	13WH
	ccqEIA|LA-A6-4	A06	67.11	66.6-68.4	6.04345	0.4287	7.8948	13WH
	ccqEIA|LA-A9-1	A09	129.61	129.1-130.5	5.11035	0.4106	7.1727	13WH
	ccqEIA|LA-A9-2	A09	137.91	137.1-138.6	17.9893	0.804	25.0059	12WH
	ccqEIA|LA-A9-3	A09	140.41	139.9-142.3	11.2558	0.6088	14.8196	13WH
	ccqEIA|LA-A9-4	A09	142.11	140.6-142.3	16.9846	0.7878	23.8244	12WH
	ccqEIA|LA-A9-5	A09	149.81	149.2-150.1	6.94617	0.485	9.6863	13WH
	ccqEIA|LA-C2-1	C02	98.71	98.2-99.5	3.36133	0.3346	4.4262	13WH
	ccqEIA|LA-C2-2	C02	108.71	106.7-110.9	7.09807	0.4641	8.9457	13WH
	ccqEIA|LA-C2-3	C02	115.81	113.9-119	5.29046	0.4228	7.4402	13WH
	ccqEIA|LA-C4-1	C04	3.01	0-4.8	2.70382	0.3532	5.052	14WH
	ccqEIA|LA-C4-2	C04	128.91	122.9-132.9	3.06621	0.2857	3.4702	13WH
	ccqEIA|LA-C4-3	C04	141.71	134.9-146.4	3.94506	0.3225	4.4228	13WH
	ccqEIA|LA-C4-4	C04	149.51	148.1-152.6	3.76061	0.3148	4.2369	13WH
	ccqEIA|LA-C4-5	C04	154.61	152.6-155.6	3.53927	0.3052	4.0135	13WH
	ccqEIA|LA-C5-1	C05	57.91	56.4-60.1	3.22896	-0.3141	4.2002	13WH
	ccqEIA|LA-C5-2	C05	68.81	68.6-69.4	4.43548	-0.3597	5.4403	13WH
	ccqEIA|LA-C5-3	C05	75.48	74.19-76.77	2.777-3.73457	-0.3536--0.3	3.96-4.5749	12WH/13WH
	ccqEIA|LA-C5-4	C05	101.61	101.1-102.6	4.14687	0.3527	4.6452	13WH
	ccqEIA|LA-C5-5	C05	134.68	129.1-140.26	3.02932-7.57	0.3527-0.5924	4.7239-12.51	12WH/13WH
	ccqEIA|LA-C5-6	C05	180.81	178.7-184.4	3.30274	-0.3562	3.621	12WH
	ccqEIA|LA-C6-1	C06	50.11	49.1-51.4	4.89552	-0.832	19.6652	08DL
	ccqEIA|LA-C6-2	C06	74.51	73.2-76	2.52588	-0.2921	2.8805	13WH
	ccqEIA|ALA-A3	A03	96.81	92.7-101	2.78411	-0.19	3.7637	13WH
	ccqEIA|ALA-A5-1	A05	12.91	12.5-14.5	4.12517	-0.2442	6.3177	13WH
	ccqEIA|ALA-A5-2	A05	23.91	20.8-26.8	8.46517	-0.3412	12.4075	13WH
	ccqEIA|ALA-A5-3	A05	33.91	33.5-34.6	6.45792	-0.3009	9.6554	13WH
	ccqEIA|ALA-A5-4	A05	54.61	53.3-55.5	8.38054	-0.2427	10.619	12WH
	ccqEIA|ALA-A5-5	A05	63.21	62.5-66.5	8.00296	-0.2369	10.19	12WH
	ccqEIA|ALA-A6-1	A06	44.41	41.4-45.5	2.71033	0.2081	4.5167	13WH
	ccqEIA|ALA-A6-2	A06	51.01	50.6-51.2	5.79607	0.2866	13.3448	08DL
	ccqEIA|ALA-A6-3	A06	55.61	54.7-55.9	3.06838	0.1991	3.9965	13WH
	ccqEIA|ALA-A6-4	A06	60.01	58.3-62.1	4.78051	0.2642	11.1987	08DL
	ccqEIA|ALA-A9-1	A09	73.41	70.2-73.8	3.25066	-0.225	4.5594	13WH
	ccqEIA|ALA-A9-2	A09	83.61	77.6-86.6	3.28755	-0.2415	5.7484	13WH
	ccqEIA|ALA-A9-3	A09	122.31	120.3-128.1	2.59532	-0.1263	2.9136	12WH
	ccqEIA|ALA-C2-1	C02	62.6	62.3-62.91	3.135-3.62824	0.186-0.226	4.45-5.4295	12WH/13WH
	ccqEIA|ALA-C2-2	C02	71.63	71.13-72.14	4.08-4.1664	0.1962-0.257	5.74-6.1754	12WH/13WH
	ccqEIA|ALA-C4	C04	138.91	135.7-141.7	2.82968	0.1332	3.2529	12WH
	ccqEIA|ALA-C7-1	C07	64.11	63.6-65.1	3.30057	0.2105	4.7035	13WH
	ccqEIA|ALA-C7-2	C07	67.01	60.2-71.5	3.53927	0.2196	7.9895	08DL
	ccqEIA|ALA-C7-3	C07	72.61	71.6-78.2	4.51794	0.2437	6.3446	13WH
	ccqEIA|ALA-C7-4	C07	80.31	79.2-82.8	3.45681	0.2146	4.9341	13WH
	ccqEIA|ALA-C8-1	C08	19.21	18.5-31.5	3.1682	0.1466	3.792	12WH
	ccqEIA|ALA-C8-2	C08	82.21	77.2-89.9	2.62136	-0.1428	3.3463	12WH
	ccqEIA|ALA-C9-1	C09	13.35	12.59-14.11	4.2315-9.24	-0.276--0.2656	6.069-11.88	12WH/13WH
	ccqEIA|ALA-C9-2	C09	19.81	19.2-20.1	9.57404	-0.2749	12.4132	12WH
	ccqEIA|ALA-C9-3	C09	21.65	21.05-22.25	5.37943-8.79	-0.2929--2.6	7.632-11.34	12WH/13WH
	ccqEIA|ALA-C9-4	C09	142.11	140.6-142.6	11.577	-1.2952	17.5747	12WH
	ccqEIA|ALA-C9-5	C09	152.11	151.8-152.7	8.66264	-1.1136	13.6039	12WH
	ccqEIA|ALA-C9-6	C09	37.01	32-41	3.28538	0.6639	4.5626	12WH
	ccqEIA|EA-C3	C03	201.21	192.7-207.1	2.81015	-0.9128	5.9553	14WH
	ccqEIA|EA-C4	C04	13.91	12.2-24.9	3.83873	-0.8042	5.7082	13WH
	ccqEIA|EA-C5	C05	101.61	101-104.7	4.06224	-0.7113	5.6706	12WH
	ccqEIA|EA-C7-1	C07	34.91	32.6-35.7	2.59966	-0.5848	3.5733	12WH
	ccqEIA|EA-C7-2	C07	54.41	52.4-56.9	5.0778	-0.8395	8.168	13WH
	ccqEIA|EA-C7-3	C07	67.01	64.8-71.5	2.55409	0.8467	3.8203	13WH
	ccqEIA|EA-C8	C08	6.71	4.9-9.9	5.48142	-0.8362	8.2927	13WH
EA	ccqEA|PA-A1-1	A01	8.01	4.8-10.3	3.80618	0.0529	5.1579	12WH
	ccqEA|PA-A1-2	A01	21.31	12.2-22.4	3.13565	0.049	4.0729	13WH
	ccqEA|PA-A1-3	A01	39.21	38-41.2	2.76892	0.0437	3.4981	13WH
	ccqEA|PA-A3-1	A03	9.41	7.2-10.5	3.39171	-0.0701	6.1644	14WH
	ccqEA|PA-A3-2	A03	98.21	97.4-101	3.29189	-0.0503	4.4707	13WH
	ccqEA|PA-A3-3	A03	105.81	105-110.4	3.75627	-0.0532	5.075	13WH
	ccqEA|PA-A3-4	A03	122.71	121.9-125.2	3.43945	-0.0475	4.6593	12WH
	ccqEA|PA-A6	A06	64.41	63.7-65.2	5.2948	0.0637	7.2801	13WH
	ccqEA|PA-A7-1	A07	97.21	91.8-102.1	7.01995	-0.0701	9.8461	12WH
	ccqEA|PA-A7-2	A07	106.91	106.2-108	6.24092	-0.067	8.861	12WH
	ccqEA|PA-A7-3	A07	116.11	114.6-118.3	4.91071	-0.0619	6.7322	13WH
	ccqEA|PA-A9	A09	137.91	135.6-139.2	3.18339	0.0455	4.0001	12WH
	ccqEA|PA-C2	C02	114.81	113.8-119.1	2.87091	0.0428	3.6155	12WH
	ccqEA|PA-C3-1	C03	112.61	108.1-113.8	3.98629	-0.0522	5.4481	12WH
	ccqEA|PA-C3-2	C03	124.71	123.5-128.3	3.14433	-0.0457	4.3435	12WH
	ccqEA|PA-C4	C04	101.71	100.1-110.5	2.92082	0.0457	3.9254	13WH
	ccqEA|PA-C5-1	C05	7.81	3.5-11.9	3.11829	0.0625	5.7969	14WH
	ccqEA|PA-C5-2	C05	15.31	11.9-25.3	3.60871	0.0656	6.5773	14WH
	ccqEA|PA-C5-3	C05	70.31	69.7-72.2	6.45141	-0.0694	8.9927	13WH
	ccqEA|PA-C5-4	C05	80.11	79.8-80.7	6.03043	-0.0676	8.4466	13WH
	ccqEA|PA-C5-5	C05	82.81	80.1-85.8	3.37001	-0.0503	5.33	12WH
	ccqEA|PA-C8-1	C08	31.51	24.3-37.2	3.65645	-0.0705	7.5397	14WH
	ccqEA|PA-C8-2	C08	41.41	37.2-46.8	3.30491	-0.0626	5.8405	14WH
	ccqEA|SA-A3-1	A03	123.71	122.7-126	2.91648	-0.037	4.771	13WH
	ccqEA|SA-A3-2	A03	127.91	127.7-130.6	2.73203	-0.0307	4.5051	12WH
	ccqEA|SA-A3-3	A03	136.41	134.7-138.6	4.94977	0.0495	8.232	13WH
	ccqEA|SA-A3-4	A03	144.11	143.1-144.6	3.89732	0.0458	8.4569	12WH
	ccqEA|SA-A5-1	A05	39.01	38.2-40.2	2.90346	-0.0245	4.8366	12WH
	ccqEA|SA-A5-2	A05	47.51	47.2-48.5	3.40256	-0.0268	5.6333	12WH
	ccqEA|SA-A5-3	A05	55.01	50.9-56.5	2.5823	-0.0234	4.3111	12WH
	ccqEA|SA-A6-1	A06	89.71	87.4-90.9	3.71504	-0.0265	6.5673	14WH
	ccqEA|SA-A6-2	A06	98.11	97.6-101.9	5.21017	-0.0309	9.0522	14WH
	ccqEA|SA-A10	A10	71.71	67.1-72.7	2.96856	0.0252	4.9378	12WH
	ccqEA|SA-C1	C01	47.11	45.3-48.2	3.50889	0.0323	9.0081	08DL
	ccqEA|SA-C2	C02	118.01	116.3-119.1	4.50709	0.0303	7.5819	12WH
	ccqEA|SA-C9-1	C09	63.81	62-64.7	4.83693	0.0312	8.0107	13WH
	ccqEA|SA-C9-2	C09	75.81	72.8-81.1	3.66513	0.0279	6.3883	13WH
	ccqEA|0A-A1	A01	22.32	17.88-26.75	3.34614-3.48	-0.94--0.5313	5.1838-5.6	12WH/11HG
	ccqEA|0A-A2-1	A02	40.11	39.5-41.1	3.21811	-1.0721	8.7932	11GS
	ccqEA|0A-A2-2	A02	49.01	47.2-53.6	4.22933	-1.2439	11.6926	11GS
	ccqEA|0A-A2-3	A02	55.51	54.7-56.2	2.77543	-1.05	7.1631	11GS
	ccqEA|0A-A3-1	A03	0.01	0-1.7	3.1899	0.6165	5.5683	14WH
	ccqEA|0A-A3-2	A03	9.41	8-10.5	4.05356	0.732	7.0224	14WH
	ccqEA|0A-A3-3	A03	17.81	15.8-22.4	3.65428	-0.87	6.3418	11WH
	ccqEA|0A-A3-4	A03	46.31	45.8-47.5	3.14216	-0.7592	5.461	14WH
	ccqEA|0A-A3-5	A03	89.01	87.8-89.4	3.11829	0.5327	4.6559	13WH
	ccqEA|0A-A3-6	A03	98.09	96.43-99.75	4.09-6.1	0.7-0.73	6.39-9.72	09DL/12WH/13WH
	ccqEA|0A-A3-7	A03	104.87	104.29-105.46	3.46-7.5	0.68-0.76	5.1-11.24	09DL/11DL/13DL/13WH
	ccqEA|0A-A3-8	A03	112.11	111.1-112.6	5.30782	0.6575	8.4561	12WH
	ccqEA|0A-A3-9	A03	116.51	115.3-116.9	2.85789	0.6293	4.229	11DL
	ccqEA|0A-A3-10	A03	132.61	130.6-134.8	3.96459	0.7121	7.5101	14YL
	ccqEA|0A-A3-11	A03	139.11	137.9-141.3	4.42246	0.7032	7.1689	14YL
	ccqEA|0A-A5-1	A05	26.23	23.9-28.56	2.89478-3.567	0.5009-0.52	3.8244-5.213	13DL/13WH
	ccqEA|0A-A5-2	A05	34.11	33.6-37.1	4.45067	0.5759	6.4448	13DL
	ccqEA|0A-A5-3	A05	50.51	48.3-50.9	3.12697	0.6546	4.9103	09DL
	ccqEA|0A-A5-4	A05	52.41	50.9-53.3	4.66767	0.8262	6.8822	11DL
	ccqEA|0A-A5-5	A05	56.51	53.6-57.4	5.12554	0.8775	7.8444	10DL
	ccqEA|0A-A5-6	A05	59.9	58.77-61.04	3.99063-7.73	0.7411-0.835	6.2125-11.45	09DL/11DL/13WH
	ccqEA|0A-A5-7	A05	72.41	69.75-75.08	3.62-3.9277	0.58-0.7731	6.1161-6.369	10DL/12WH
	ccqEA|0A-A6	A06	16.01	12.7-16.8	3.30057	-0.7481	5.6554	12DL
	ccqEA|0A-A7-1	A07	8.37	6.81-9.93	3.3635-4.669	0.7317-1.064	6.2278-9.744	09DL/11DL/11WH
	ccqEA|0A-A7-2	A07	13.75	13.34-14.16	4.16206-5.66	0.7314-1.04	6.5377-9.29	09DL/11DL/11WH
	ccqEA|0A-A7-3	A07	22.11	21.9-22.5	5.21451	1.0098	8.4693	11WH
	ccqEA|0A-A7-4	A07	49.91	49.4-50.9	5.56605	0.9351	8.4094	10DL
	ccqEA|0A-A7-5	A07	68.11	65.2-72.7	3.038	0.4936	4.6827	12WH
	ccqEA|0A-A7-6	A07	113.91	112.4-114.4	5.06261	-0.9536	8.824	10DL
	ccqEA|0A-A7-7	A07	122.22	121.24-123.19	2.88-7.23912	-1.1585--0.76	7.09-11.2197	08DL/10DL
	ccqEA|0A-A9-1	A09	3.41	1.5-7.5	2.64089	-0.9535	4.7	11HG
	ccqEA|0A-A9-2	A09	17.91	17.4-22.9	5.33386	1.2467	8.8372	11HG
	ccqEA|0A-A9-3	A09	54.81	53.8-64	4.19461	0.7195	7.7408	14YL
	ccqEA|0A-A9-4	A09	108.01	106.7-110.4	2.98809	1.2321	13.2249	10GS
	ccqEA|0A-A9-5	A09	123.31	119.5-127.9	3.93855	1.2785	14.1765	10GS
	ccqEA|0A-A9-6	A09	142.91	142.8-145.9	3.01847	-0.5103	4.7815	12WH
	ccqEA|0A-A9-7	A09	154.51	151.5-155.7	4.52228	-0.6166	7.0496	12WH
	ccqEA|0A-C1	C01	89.41	87.3-90.1	2.61485	0.7379	3.8073	09DL
	ccqEA|0A-C2-1	C02	40.12	36.85-43.39	2.51-4.8608	0.587-0.9953	3.91-7.9217	09DL/11WH
	ccqEA|0A-C2-2	C02	45.41	41-50	4.71107	0.9786	7.5428	11WH
	ccqEA|0A-C2-3	C02	52.31	50.2-54.5	4.00365	1.0926	6.5323	11HG
	ccqEA|0A-C2-4	C02	58.91	57.8-61.3	3.51974	0.9947	5.7981	11HG
	ccqEA|0A-C2-5	C02	110.61	107.6-111.8	2.96205	-0.5023	4.1957	13WH
	ccqEA|0A-C2-6	C02	117.81	113.8-119.1	3.2767	-0.5269	4.7391	13WH
	ccqEA|0A-C3-1	C03	18.11	17.4-18.6	3.84307	0.5622	5.7814	13DL
	ccqEA|0A-C3-2	C03	25.71	25-28.5	2.67344	0.4689	4.0744	13DL
	ccqEA|0A-C3-3	C03	105.11	100.4-110.5	2.58013	0.6585	4.3921	12DL
	ccqEA|0A-C3-4	C03	142.11	140.8-143.6	4.09262	-1.1615	11.1661	11GS
	ccqEA|0A-C3-5	C03	165.71	162.9-167.7	2.79062	-0.5498	4.4708	14YL
	ccqEA|0A-C3-6	C03	172.61	167.7-176	3.0597	-0.5841	4.8826	14YL
	ccqEA|0A-C4-1	C04	128.91	125.3-132.9	3.00979	-0.4683	4.3443	12WH
	ccqEA|0A-C4-2	C04	148.91	147.1-149.5	2.83619	-0.9457	6.9749	11GS
	ccqEA|0A-C4-3	C04	154.61	152.6-155.6	2.87742	-0.4942	4.0915	13WH
	ccqEA|0A-C5-1	C05	59.01	49.2-60.1	3.76929	0.5616	5.4141	13WH
	ccqEA|0A-C5-2	C05	70.31	69.4-72.8	3.50889	0.5472	5.0534	13WH
	ccqEA|0A-C5-3	C05	104.51	101.6-108.8	2.76024	-1.0906	9.8717	10GS
	ccqEA|0A-C5-4	C05	169.21	167.7-173.1	3.21377	-0.7017	7.5557	08DL
	ccqEA|0A-C5-5	C05	178.51	177.8-180.8	2.66693	0.9263	6.5307	11GS
	ccqEA|0A-C6-1	C06	22.91	17.3-26.5	2.53456	-0.5182	4.0305	14YL
	ccqEA|0A-C6-2	C06	50.11	47.9-51.5	5.11252	1.3141	18.4198	08DL
	ccqEA|0A-C6-3	C06	60.11	59.8-60.3	4.19461	1.0196	6.487	10DL
	ccqEA|0A-C7	C07	98.61	93.2-99.5	4.76749	-1.0633	7.9385	11HG
	ccqEA|0A-C8-1	C08	0.01	0-6.7	4.14687	-1.3086	15.3917	10GS
	ccqEA|0A-C8-2	C08	9.51	6.7-10	3.76929	-1.2471	14.1464	10GS
	ccqEA|0A-C8-3	C08	37.01	28.4-44.1	4.33783	0.6898	7.5118	14WH
	ccqEA|0A-C8-4	C08	93.81	91.2-94.9	3.25283	0.736	4.887	11DL
	ccqEA|0A-C8-5	C08	102.21	101.6-103.2	3.67164	0.7562	5.4246	11DL
	ccqEA|LA-A1-1	A01	1.01	0-4	2.82317	0.2764	3.7225	12WH
	ccqEA|LA-A1-2	A01	7.88	5.67-10.09	2.69731-3.24	0.2621-0.332	3.3696-4.19	12WH/13WH
	ccqEA|LA-A1-3	A01	19.31	12.2-22	2.79713	0.3119	3.8763	13WH
	ccqEA|LA-A1-4	A01	26.31	25.1-28.7	4.23367	0.3162	5.4983	11DL
	ccqEA|LA-A2-1	A02	32.01	31.1-32.9	2.9078	0.3216	5.1707	14WH
	ccqEA|LA-A2-2	A02	41.58	40.89-42.27	2.79-3.09	0.25-0.3051	4.17-4.6106	13DL/14WH/11HG
	ccqEA|LA-A2-3	A02	49.94	48.69-51.18	2.86-4.75	0.26-0.42	4.71-8.1	09DL/10DL/12DL/13DL/11HG
	ccqEA|LA-A2-4	A02	59.03	58.7-59.37	2.68863-5.74	0.24-0.5	3.7095-12.03	09DL/10DL/12DL/13DL/11GS
	ccqEA|LA-A2-5	A02	67.75	66.92-68.58	2.81-6.24	0.29-0.53	5.99-13.17	10DL/12DL/10GS/11GS
	ccqEA|LA-A3-1	A03	9.41	9-9.9	5.60294	-0.7434	9.6446	14WH
	ccqEA|LA-A3-2	A03	20.71	20.4-21.1	3.51974	0.5893	5.8992	14WH
	ccqEA|LA-A3-3	A03	89.01	87.8-89.5	2.68646	-0.3016	3.5334	13WH
	ccqEA|LA-A3-4	A03	90.81	90.5-91.8	4.34868	-0.4293	5.9658	11WH
	ccqEA|LA-A3-5	A03	101.01	94.8-104.1	5.20583	-0.4672	7.0758	11WH
	ccqEA|LA-A3-6	A03	104.81	104.06-105.55	2.53456-5.69	-0.38--0.2744	3.8484-9.61	12WH/13WH/11HG
	ccqEA|LA-A3-7	A03	110.71	109.94-111.49	2.94-3.36133	-0.3765--0.22	3.73-5.05	09DL/11WH/11HG
	ccqEA|LA-A3-8	A03	113.91	112.6-114.2	5.85249	-0.4278	8.2906	12DL
	ccqEA|LA-A3-9	A03	115.3	114.46-116.15	2.91214-5.45	-0.367--0.2255	4.1409-7.33	10DL/12WH
	ccqEA|LA-A3-10	A03	119.11	118.4-121.3	2.58881	-0.2707	3.9576	11HG
	ccqEA|LA-A4	A04	54.11	49.4-55.9	2.51503	0.2167	3.2815	09DL
	ccqEA|LA-A5-1	A05	23.91	20.1-24.4	3.67381	-0.3314	5.0008	12DL
	ccqEA|LA-A5-2	A05	31.11	30.1-33.9	4.73928	-0.3773	6.4879	12DL
	ccqEA|LA-A5-3	A05	36.61	36.1-37.1	3.50889	-0.3252	4.7877	12DL
	ccqEA|LA-A5-4	A05	47.51	47.2-48.5	2.51937	-0.2191	3.7197	10DL
	ccqEA|LA-A5-5	A05	57.81	57.4-59	4.62861	-0.2996	6.6977	10DL
	ccqEA|LA-A5-6	A05	63.21	62.5-67.6	2.52588	-0.2199	3.7345	10DL
	ccqEA|LA-A6-1	A06	46.21	44.2-46.6	2.69948	0.2863	3.8709	11HG
	ccqEA|LA-A6-2	A06	52.71	52.26-53.15	3.3418-5.88	0.2958-0.458	4.4223-8.22	12WH/13WH
	ccqEA|LA-A6-3	A06	54.61	53.8-54.7	3.41992	0.3168	4.9501	11DL
	ccqEA|LA-A6-4	A06	62.91	62.1-63.3	8.13099	0.5339	11.235	13WH
	ccqEA|LA-A6-5	A06	64.41	64.1-65	8.88181	0.5402	12.1595	11DL
	ccqEA|LA-A6-6	A06	65.81	64.5-66.6	4.44416	0.3281	5.7903	12WH
	ccqEA|LA-A6-7	A06	67.11	66.55-67.66	6.97-8.21996	0.487-0.5457	9.68-11.3646	11DL13WH
	ccqEA|LA-A6-8	A06	84.11	83.2-85.5	2.87091	-0.3659	3.8039	11DL
	ccqEA|LA-A7-1	A07	70.61	69.8-72	4.1664	-0.4175	5.6615	11WH
	ccqEA|LA-A7-2	A07	72.01	70.1-72.7	4.14036	-0.2884	5.5271	13DL
	ccqEA|LA-A7-3	A07	75.71	72.7-76.7	3.95157	-0.4074	5.3869	11WH
	ccqEA|LA-A7-4	A07	77.51	77-79.5	2.66259	-0.2142	3.3882	09DL
	ccqEA|LA-A8-1	A08	32.91	32.1-34.6	3.73891	-0.4763	14.1699	10GS
	ccqEA|LA-A8-2	A08	116.21	111.2-117.2	2.74288	0.2949	4.3223	12WH
	ccqEA|LA-A9-1	A09	19.71	18.5-21.6	3.79967	-0.492	14.5199	10GS
	ccqEA|LA-A9-2	A09	25.61	22.5-27	5.45972	-0.5678	19.4927	10GS
	ccqEA|LA-A9-3	A09	32.51	27.6-35.1	4.53964	-0.5201	16.5995	10GS
	ccqEA|LA-A9-4	A09	35.61	28.8-36.3	2.75156	-0.2438	3.8106	13DL
	ccqEA|LA-A9-5	A09	56.51	53.3-57.2	3.80835	-0.3482	5.8478	11HG
	ccqEA|LA-A9-6	A09	70.51	69.4-73.8	4.78702	-0.3027	5.799	13DL
	ccqEA|LA-A9-7	A09	74.04	72.68-75.41	2.51-5.61	-0.2614--0.35	3.17-8.43	09DL/11DL/12DL
	ccqEA|LA-A9-8	A09	83.04	80.14-85.93	3.67-4.75447	-0.3315--0.29	3.87-7.8334	09DL/12DL/13DL
	ccqEA|LA-A9-9	A09	91.71	90.3-101.4	2.56277	-0.2274	3.1778	13DL
	ccqEA|LA-A9-10	A09	127.75	127.29-128.2	5.76135-10.53	0.4-0.53	8.3291-15.17	11DL/11WH/12WH
	ccqEA|LA-A9-11	A09	129.51	129.14-129.88	2.7-4.80872	0.24-0.3073	3.7-6.7222	09DL/13DL
	ccqEA|LA-A9-12	A09	133.61	132.72-134.49	3.95-3.97327	0.2777-0.387	5.97-5.9734	10DL/11GS
	ccqEA|LA-A9-13	A09	134.9	134.67-135.14	8.15486-11.65	0.54-0.61	11.48-16.58	11WH/12WH/13WH
	ccqEA|LA-A9-14	A09	137.19	136.43-137.96	5.36207-11.19	0.3264-0.544	7.4466-15.78	09DL/11DL
	ccqEA|LA-A9-15	A09	140.28	139.43-141.14	3.91251-9.05	0.314-0.56	5.3462-12.46	13DL/13WH/11GS
	ccqEA|LA-A9-16	A09	143.54	142.7-144.39	4.37906-8.1	0.2969-0.612	6.1421-11.68	09DL/10DL/11WH
	ccqEA|LA-A9-17	A09	146.91	146.4-147.2	8.8753	0.4784	12.7195	11DL
	ccqEA|LA-A9-18	A09	148.81	147.2-149.8	3.13348	0.2551	4.2856	13DL
	ccqEA|LA-A9-19	A09	149.81	149.37-150.24	4.24018-6.04	0.391-0.46	8.557-8.59	11GS/13WH
	ccqEA|LA-A10-1	A10	3.81	0-4.5	2.821	0.2766	3.4202	11DL
	ccqEA|LA-A10-2	A10	19.51	19.2-19.9	2.66476	0.3041	3.2525	11DL
	ccqEA|LA-A10-3	A10	23.51	23.2-24.3	3.01847	0.3106	3.624	11DL
	ccqEA|LA-A10-4	A10	30.31	25.1-30.6	3.51974	0.5189	4.7574	11WH
	ccqEA|LA-A10-5	A10	37.71	36.7-41.7	2.92082	0.4387	4.2776	11WH
	ccqEA|LA-C2	C02	63.21	62.8-64.3	3.74976	-0.3621	5.0725	12DL
	ccqEA|LA-C3-1	C03	0.01	0-4.2	2.81883	-0.2743	3.9691	11HG
	ccqEA|LA-C3-2	C03	22.61	20.1-25.1	2.80364	-0.4517	9.9912	10GS
	ccqEA|LA-C3-3	C03	111.21	107.9-111.9	2.93384	-0.3477	3.9862	11WH
	ccqEA|LA-C3-4	C03	118.31	111.9-122.3	3.81703	-0.3972	5.1125	11WH
	ccqEA|LA-C3-5	C03	132.41	130.4-134.9	2.52588	-0.2158	3.2326	09DL
	ccqEA|LA-C3-6	C03	141.11	139.3-143.5	2.54324	-0.2146	3.2749	09DL
	ccqEA|LA-C3-7	C03	186.51	184.1-192.4	3.21811	-0.3058	4.0271	12DL
	ccqEA|LA-C4-1	C04	59.21	57.6-60.6	2.81449	-0.2342	3.4895	13DL
	ccqEA|LA-C4-2	C04	96.01	91.6-97.1	3.97978	0.3115	5.2224	12WH
	ccqEA|LA-C4-3	C04	108.91	105.1-121.9	3.93638	0.3133	5.3466	12WH
	ccqEA|LA-C4-4	C04	153.61	150.7-154.6	2.86223	0.297	3.7059	13WH
	ccqEA|LA-C5-1	C05	35.11	34.3-43.3	3.00762	-0.2626	3.6325	12WH
	ccqEA|LA-C5-2	C05	57.91	57.08-58.74	2.65-6.75	-0.38--0.25	3.22-11.41	09DL/10DL/11DL/13DL/13WH/11HG
	ccqEA|LA-C5-3	C05	66.27	66.1-66.44	7.8-8.88	-0.51--0.42	12.17-12.81	09DL/12DL/11HG
	ccqEA|LA-C5-4	C05	67.61	66.7-69.1	8.00296	-0.384	12.007	10DL
	ccqEA|LA-C5-5	C05	70.8	69.87-71.74	6.38631-8.22	-0.3842--0.5	8.5176-11.78	11DL/12DL/13DL
	ccqEA|LA-C5-6	C05	76.31	75.63-76.98	5.39-6.59	-0.45--0.36	8.2-11.17	09DL/10DL/11DL/11HG
	ccqEA|LA-C5-7	C05	78.51	77.2-79.7	7.28035	-0.5264	13.0036	12DL
	ccqEA|LA-C5-8	C05	109.81	109.2-112.7	3.71721	-0.3814	4.9747	11WH
	ccqEA|LA-C5-9	C05	118.71	117.5-120.6	2.5389	-0.3181	3.4215	11WH
	ccqEA|LA-C6-1	C06	27.11	21.3-28.9	3.10527	-0.2661	8.3004	08DL
	ccqEA|LA-C6-2	C06	54.81	54.4-56.5	3.06838	-0.3954	4.0122	13WH
	ccqEA|LA-C6-3	C06	62.71	61.5-63.4	2.56277	-0.3238	3.3356	13WH
	ccqEA|LA-C7	C07	44.61	43.2-47.2	2.61702	-0.3255	3.3896	11WH
	ccqEA|LA-C9-1	C09	13.31	11-13.8	3.41775	-0.3065	4.4237	12WH
	ccqEA|LA-C9-2	C09	18.91	18.3-19.3	6.41235	-0.3959	8.897	13DL
	ccqEA|LA-C9-3	C09	19.81	19.4-20.9	4.47671	-0.4058	6.963	11HG
	ccqEA|LA-C9-4	C09	21.91	20.9-23.2	3.59786	-0.2929	4.9775	09DL
	ccqEA|LA-C9-5	C09	25.71	25.3-26.8	3.52408	-0.2843	5.0372	13DL
	ccqEA|LA-C9-6	C09	29.9	26.99-32.82	4.34217-5.35	-0.42--0.302	5.9403-8.23	09DL/11HG
	ccqEA|ALA-A1-1	A01	6.51	2.6-8	2.85355	0.2026	4.0711	11WH
	ccqEA|ALA-A1-2	A01	17.31	12.3-21.8	3.5805	0.234	5.6233	11WH
	ccqEA|ALA-A1-3	A01	22.41	21.35-23.46	2.98-7.87	0.162-0.338	4.16-17.86	09DL/12DL/11HG/11GS
	ccqEA|ALA-A1-4	A01	31.91	31.1-32.9	5.65719	0.2927	13.4756	11GS
	ccqEA|ALA-A3-1	A03	18.21	16.8-24.2	2.55626	0.17	4.767	11GS
	ccqEA|ALA-A3-2	A03	41.51	40.7-42.8	2.8427	0.1883	5.2921	11GS
	ccqEA|ALA-A3-3	A03	96.81	92.7-101	2.93384	-0.1964	4.0144	13WH
	ccqEA|ALA-A3-4	A03	101.01	100.2-103.2	2.52805	-0.1644	3.934	11HG
	ccqEA|ALA-A3-5	A03	104.11	103.48-104.73	4.55-6.81	-0.3--0.1673	5.8815-10.02	09DL/12DL/11WH
	ccqEA|ALA-A3-6	A03	109.21	105-111.1	2.52371	-0.224	4.414	10DL
	ccqEA|ALA-A3-7	A03	112.24	111.75-112.73	3.02-5.42	-0.27--0.14	3.6-7.98	09DL/11DL/11WH/11HG
	ccqEA|ALA-A3-8	A03	113.51	113.1-114.1	3.07489	-0.161	4.4674	12DL
	ccqEA|ALA-A3-9	A03	118.41	117.5-119.1	2.96639	-0.1833	5.2587	14YL
	ccqEA|ALA-A3-10	A03	127.61	126.21-129.02	2.49767-4.67	-0.227-0.1727	4.6725-8.12	11GS/14YL
	ccqEA|ALA-A5-1	A05	13.91	12.7-14.5	4.20329	-0.2487	6.533	13WH
	ccqEA|ALA-A5-2	A05	20.96	20.12-21.81	2.66476-8.07	-0.33--0.14	3.3-12	11DL/13WH/11HG/11GS
	ccqEA|ALA-A5-3	A05	33.9	33.43-34.37	3.472-6.07	-0.31--0.2083	4.9061-10.13	12DL/11WH/13WH/14YL
	ccqEA|ALA-A5-4	A05	39.69	39.22-40.16	2.64306-5.685	-0.22--0.1837	3.7652-8.2	12DL/11WH
	ccqEA|ALA-A5-5	A05	41.81	40.96-42.65	5.28-6.11289	-0.3351	7.75-10.8199	12DL/14YL
						-0.2221
	ccqEA|ALA-A5-6	A05	45.91	45.6-46.2	6.32121	-0.2417	9.1502	12DL
	ccqEA|ALA-A5-7	A05	47.51	47.2-48	7.02863	-0.2469	9.9758	12DL
	ccqEA|ALA-A5-8	A05	54.61	53.3-55.5	7.57981	-0.2271	9.215	12WH
	ccqEA|ALA-A5-9	A05	62.11	60.4-62.5	7.51905	-0.2269	9.1487	12WH
	ccqEA|ALA-A5-10	A05	77.71	71.1-79.7	2.52154	-0.1327	2.9965	11DL
	ccqEA|ALA-A6-1	A06	3.22	2.77-3.67	3.578-4.4485	0.1845-0.2374	5.7654-13.469	11DL/10GS
	ccqEA|ALA-A6-2	A06	43.68	42.61-45.5	3.12-3.56531	0.2171-0.225	5.273-7.6557	11GS/13WH
	ccqEA|ALA-A6-3	A06	52.31	50.8-54.6	4.16857	0.2366	8.8008	11GS
	ccqEA|ALA-A6-4	A06	55.61	54.7-55.9	3.41775	0.2117	4.5153	13WH
	ccqEA|ALA-A6-5	A06	64.41	63.9-65	4.37038	0.1571	5.1956	09DL
	ccqEA|ALA-A6-6	A06	67.11	66.6-68	2.59315	0.181	3.4543	13WH
	ccqEA|ALA-A6-7	A06	75.01	74.2-75.7	4.34	-0.2147	4.7599	09DL
	ccqEA|ALA-A6-8	A06	81.51	80.5-82.8	4.48973	-0.2084	5.7006	09DL
	ccqEA|ALA-A6-9	A06	92.01	90.9-96.8	4.20112	-0.1643	4.5428	09DL
	ccqEA|ALA-A6-10	A06	98.11	97.9-101.6	2.52154	-0.1247	2.775	09DL
	ccqEA|ALA-A7-1	A07	105.41	104-109.4	4.48539	0.1944	6.3968	12DL
	ccqEA|ALA-A7-2	A07	115.51	113.9-115.7	3.906	0.1956	6.2112	12DL
	ccqEA|ALA-A8-1	A08	29.81	23.6-30.7	3.05753	0	4.3487	13DL
	ccqEA|ALA-A8-2	A08	40.72	39.29-42.16	2.80798-3.055	-0.1456-0	3.3842-3.5484	11DL/13DL
	ccqEA|ALA-A9-1	A09	73.41	69.9-73.8	3.20509	-0.2252	4.5694	13WH
	ccqEA|ALA-A9-2	A09	83.61	77.6-86.6	3.19858	-0.2385	5.5965	13WH
	ccqEA|ALA-A9-3	A09	91.78	90.89-92.67	2.65608-3.2	-0.2323--0.1836	5.39-5.5528	11WH/11GS
	ccqEA|ALA-A9-4	A09	98.79	97.79-99.78	2.64-6.23875	-0.2998--0.143	3.48-10.0533	12DL/11WH/11GS
	ccqEA|ALA-A9-5	A09	105.71	102.7-107	3.32227	-0.3099	8.6544	11WH
	ccqEA|ALA-A9-6	A09	117.41	116.2-118.8	4.94543	-0.1951	6.6234	11DL
	ccqEA|ALA-A9-7	A09	125.13	123.1-127.17	2.51-7.75	-0.244--0.142	3.09-10.14	10DL/11DL/12WH
	ccqEA|ALA-A9-8	A09	131.72	130.91-132.52	2.59-7.34	-0.24--0.11	2.84-9.6	09DL/10DL/11DL/12DL/11HG
	ccqEA|ALA-A9-9	A09	135.61	134.9-137.6	4.85212	-0.229	7.5969	11HG
	ccqEA|ALA-A9-10	A09	142.91	142.6-145.6	3.15518	-0.1898	5.0225	11HG
	ccqEA|ALA-A10-1	A10	0.81	0-1.4	13.4301	0	23.2946	13DL
	ccqEA|ALA-A10-2	A10	13.31	12.9-13.5	7.92918	0	13.8166	13DL
	ccqEA|ALA-A10-3	A10	15.21	15.1-15.4	11.7419	0	19.4101	13DL
	ccqEA|ALA-A10-4	A10	19.51	19.3-19.9	8.42611	0	14.583	13DL
	ccqEA|ALA-A10-5	A10	63.41	60.4-66.1	8.24383	-0.258	11.0247	11DL
	ccqEA|ALA-C1-1	C01	27.01	23.8-32	4.6221	0.2888	18.1183	10GS
	ccqEA|ALA-C1-2	C01	35.57	34.75-36.39	2.573-4.74145	0.1777-0.2847	3.411-18.5918	11WH/10GS
	ccqEA|ALA-C2-1	C02	55.51	53-57.2	2.52805	0.1831	4.7203	11GS
	ccqEA|ALA-C2-2	C02	62.61	62.31-62.9	3-4.30311	0.1974-0.2228	4.305-6.0712	12WH/13WH
	ccqEA|ALA-C2-3	C02	71.63	71.13-72.14	3.69-5.10384	0.2114-0.2464	5.26-7.1236	12WH/13WH
	ccqEA|ALA-C2-4	C02	87.51	85.3-89.7	2.55409	-0.2214	3.4058	13WH
	ccqEA|ALA-C2-5	C02	98.11	97.1-99.12	2.57145-3.45	0.1479-0.174	3.3964-4.76	11DL/12DL
	ccqEA|ALA-C2-6	C02	105.01	104.8-105.9	2.96205	0.157	4.094	11DL
	ccqEA|ALA-C3-1	C03	134.91	133.8-136.6	2.63004	0.2158	9.6418	10GS
	ccqEA|ALA-C3-2	C03	143.61	143.4-146.3	3.33963	0.2118	8.5594	08DL
	ccqEA|ALA-C3-3	C03	152.41	151.5-153.8	3.09225	0.2871	7.9181	08DL
	ccqEA|ALA-C4-1	C04	58.61	57.6-65.2	2.74505	0	4.2813	13DL
	ccqEA|ALA-C4-2	C04	128.91	125.6-132.9	3.30708	0.1297	3.611	09DL
	ccqEA|ALA-C4-3	C04	150.71	148.9-152	4.54398	0.1494	4.9309	09DL
	ccqEA|ALA-C5-1	C05	114.31	113-115.4	6.10204	0.188	7.7101	09DL
	ccqEA|ALA-C5-2	C05	122.21	121.7-123.3	7.79898	0.2113	9.5894	09DL
	ccqEA|ALA-C5-3	C05	129.01	123.8-137	5.61379	0.2155	10.297	09DL
	ccqEA|ALA-C5-4	C05	140.68	136.95-144.42	4.76098-5.75	0.237-0.3225	8.6966-13.624	12DL/11GS
	ccqEA|ALA-C6	C06	54.11	50-55.4	2.54758	0.2247	4.1843	11HG
	ccqEA|ALA-C7-1	C07	64.11	63.6-65.1	2.93167	0.2	4.237	13WH
	ccqEA|ALA-C7-2	C07	74.61	68.4-79.2	4.15555	0.2367	6.016	13WH
	ccqEA|ALA-C7-3	C07	80.31	79.2-82.8	3.34831	0.2125	4.8308	13WH
	ccqEA|ALA-C7-4	C07	93.21	87.5-102.9	4.53747	0.2197	7.0047	11HG
	ccqEA|ALA-C8	C08	19.21	18.5-32.6	3.11612	0.1387	3.3702	12WH
	ccqEA|ALA-C9-1	C09	4.01	1.3-6.8	7.90314	-0.3099	14.0765	12WH
	ccqEA|ALA-C9-2	C09	13.31	12.67-13.94	4.311-12.20408	-0.3137--0.27	6.2899-15.635	12WH/13WH
	ccqEA|ALA-C9-3	C09	19.01	17.9-19.2	11.8417	-0.3034	15.2493	12WH
	ccqEA|ALA-C9-4	C09	21.51	20.4-21.9	5.36207	-0.2953	7.7425	13WH
	ccqEA|ALA-C9-5	C09	21.91	21.9-23.1	10.5939	-0.2877	13.8668	12WH
	ccqEA|EIA-A1-1	A01	22.91	22.4-25.1	2.57796	0.6239	6.3379	08DL
	ccqEA|EIA-A1-2	A01	34.51	31.1-35.5	3.41558	0.6894	8.1371	08DL
	ccqEA|EIA-A1-3	A01	39.81	38.4-40.3	2.83185	0.624	6.7394	08DL
	ccqEA|EIA-A3	A03	9.41	8-9.7	3.87779	-0.206	5.1141	12WH
	ccqEA|EIA-A7	A07	83.41	80.1-95.2	3.40039	0.6835	7.983	08DL
	ccqEA|EIA-A9-1	A09	142.11	140.6-142.6	12.9484	0.3973	18.8478	12WH
	ccqEA|EIA-A9-2	A09	152.11	151.2-152.2	9.29411	0.3353	14.0871	12WH
	ccqEA|EIA-C2-1	C02	37.01	32.1-42	3.41124	-0.1947	4.4934	12WH
	ccqEA|EIA-C2-2	C02	98.21	97.4-98.7	3.75844	0.2013	5.782	13WH
	ccqEA|EIA-C2-3	C02	103.21	99.5-104.4	4.29877	0.2075	6.5846	13WH
	ccqEA|EIA-C2-4	C02	113.51	111.8-116.6	2.99894	0.1746	4.7772	13WH
	ccqEA|EIA-C3-1	C03	28.61	18.5-30.7	2.57796	-0.6236	5.9861	08DL
	ccqEA|EIA-C3-2	C03	39.51	38.5-42.5	2.63655	0.2366	4.9118	14WH
	ccqEA|EIA-C5	C05	101.61	101-104.5	4.20546	0.2107	5.5455	12WH
	ccqEA|EIA-C6	C06	49.11	47.9-50.7	3.70202	-0.8468	8.8202	08DL
	ccqEA|EIA-C7-1	C07	24.41	24-25.6	3.36133	0.1937	4.5588	12WH
	ccqEA|EIA-C7-2	C07	31.51	30.6-32.6	3.8626	0.2116	5.3196	12WH
	ccqEA|EIA-C7-3	C07	38.11	36.7-38.5	4.8391	0.2362	6.4692	12WH
	ccqEA|EIA-C7-4	C07	44.91	44.6-47	3.54361	0.2023	4.7976	12WH
	ccqEA|EIA-C7-5	C07	54.41	51.5-56.9	6.31687	0.2571	9.848	13WH
	ccqEA|EIA-C8	C08	6.71	4.4-9.2	4.55266	0.2091	6.9647	13WH
	ccqEA|FAS-A1-1	A01	6.71	4.5-9.8	2.80147	0.0541	3.5282	11HG
	ccqEA|FAS-A1-2	A01	32.32	30.7-33.94	3.97-4.48105	0.049-0.0655	5.389-5.4748	13DL/11HG
	ccqEA|FAS-A1-3	A01	40.61	40.3-41.2	3.19207	0.044	4.3651	13DL
	ccqEA|FAS-A1-4	A01	58.84	58.55-59.12	3.98-6.12374	0.051-0.0644	4.86-7.1789	09DL/10DL/11DL
	ccqEA|FAS-A1-5	A01	65.7	64.33-65.08	4.09-5.56171	0.0528-0.06	4.977-7.1807	09DL/10DL/11DL
	ccqEA|FAS-A1-6	A01	69.51	67-70.2	3.91251	0.0526	4.7749	11DL
	ccqEA|FAS-A1-7	A01	76.01	73.96-78.05	3.52-4.01667	0.0504-0.0546	5.32-6.8654	09DL/11DL
	ccqEA|FAS-A2-1	A02	12.61	10.6-16.1	2.51503	0.0381	2.6905	10DL
	ccqEA|FAS-A2-2	A02	71.11	68-76.5	3.06404	0.0566	4.4084	11WH
	ccqEA|FAS-A2-3	A02	79.01	78-87.7	2.55409	0.0478	3.0971	11WH
	ccqEA|FAS-A3-1	A03	1.71	0-3.4	3.06187	0.0467	3.6195	12DL
	ccqEA|FAS-A3-2	A03	47.01	46.4-48.4	2.93384	0.0461	4.0006	13DL
	ccqEA|FAS-A3-3	A03	52.31	51-52.6	3.63475	0.0511	4.9324	13DL
	ccqEA|FAS-A3-4	A03	90.51	90.3-91.8	2.84921	-0.0543	3.5455	11HG
	ccqEA|FAS-A3-5	A03	113.11	109-114	2.97941	-0.0523	3.6997	11HG
	ccqEA|FAS-A4	A04	11.31	10.6-14.6	2.70382	0.0515	3.2098	12DL
	ccqEA|FAS-A5-1	A05	0.01	0-5.4	3.25934	0.045	3.7204	11DL
	ccqEA|FAS-A5-2	A05	56.91	56.5-59	3.17688	-0.0639	7.2868	11GS
	ccqEA|FAS-A6-1	A06	3.91	3.2-5.4	5.12771	0.0575	7.2259	13DL
	ccqEA|FAS-A6-2	A06	10.8	8.04-13.57	2.91214-6.7	0.0428-0.0638	3.2777-9.29	11DL/13DL
	ccqEA|FAS-A6-3	A06	18.21	17.8-19.4	5.3382	0.0573	7.5087	13DL
	ccqEA|FAS-A6-4	A06	29.91	29.1-31.7	2.53673	0.04	2.8687	11DL
	ccqEA|FAS-A6-5	A06	75.71	69-78.7	3.67815	0.0603	4.962	11HG
	ccqEA|FAS-A6-6	A06	119.93	118.01-121.86	3.18-3.85	-0.054--0.045	3.66-4.46	10DL/11DL/11WH
	ccqEA|FAS-A7-1	A07	0.01	0-3.5	2.66042	-0.0505	3.1767	12DL
	ccqEA|FAS-A7-2	A07	5.41	1.4-6.9	3.05102	-0.0448	5.1831	09DL
	ccqEA|FAS-A7-3	A07	15.51	14-17.6	4.71758	-0.0453	5.5154	09DL
	ccqEA|FAS-A7-4	A07	17.41	16.91-17.69	3.35482-3.59	-0.049--0.0463	3.8482-4.38	10DL/11DL
	ccqEA|FAS-A7-5	A07	23.86	22.9-24.81	3.54578-4.75	-0.05--0.046	4.3155-5.51	09DL/11DL
	ccqEA|FAS-A7-6	A07	28.21	27.4-29.2	2.78845	-0.0424	3.2197	10DL
	ccqEA|FAS-A7-7	A07	33.11	28.8-35.3	2.5823	-0.0439	3.069	12DL
	ccqEA|FAS-A7-8	A07	101.79	99.62-103.96	3.1-3.75	-0.06--0.04	3.37-4.92	10DL/11DL/11WH
	ccqEA|FAS-A7-9	A07	112.21	110.8-113.9	4.24452	-0.0688	5.5514	11WH
	ccqEA|FAS-A7-10	A07	118.11	115.1-120.7	3.81486	-0.0691	6.6795	11WH
	ccqEA|FAS-A8-1	A08	28.81	27.9-30.7	3.6022	-0.0591	4.8335	11WH
	ccqEA|FAS-A8-2	A08	38.11	37.6-38.7	4.96279	-0.0681	6.5188	11WH
	ccqEA|FAS-A9-1	A09	97.81	86.7-101	2.52371	0.0422	2.8533	11DL
	ccqEA|FAS-A9-2	A09	106.71	103.6-107	2.53239	0.0424	3.0031	11DL
	ccqEA|FAS-A9-3	A09	118.31	117.2-119.3	5.65502	0.0794	8.2801	11HG
	ccqEA|FAS-A9-4	A09	126.28	125.62-126.94	8.7689-8.77982	0.08-0.098	11.643-12.45	11DL/11HG
	ccqEA|FAS-A9-5	A09	132.71	132.13-133.28	9.77-16.61786	0.086-0.1109	12.9-22.0178	10DL/11DL
	ccqEA|FAS-A9-6	A09	135.89	135.49-136.3	5.94-10.56	0.08-0.10	8.21-16.69	11DL/11WH/11HG/11GS
	ccqEA|FAS-A9-7	A09	138.11	137.55-138.66	5.748-7.19572	0.0609-0.0699	7.38-9.6112	09DL/12DL
	ccqEA|FAS-A9-8	A09	139.99	139.39-140.59	7.83-15.49597	0.088-0.1148	11.58-20.83	10DL/11DL/11GS
	ccqEA|FAS-A9-9	A09	142.31	140.4-142.6	7.64708	0.063	10.0934	09DL
	ccqEA|FAS-A9-10	A09	145.91	143.3-147	9.96681	0.0899	13.0392	11DL
	ccqEA|FAS-A9-11	A09	146.41	146.09-146.72	7.30639-13.45	0.0628-0.1066	9.7135-18.41	09DL/10DL
	ccqEA|FAS-A9-12	A09	149.81	149.19-150.42	4.90637-5.89	0.08-0.0903	8.283-13.3651	11GS/11WH
	ccqEA|FAS-A10-1	A10	57.91	57.2-59	2.95988	0.0562	3.9423	11HG
	ccqEA|FAS-A10-2	A10	64.45	62.12-66.79	2.51937-3.08	0.0395-0.056	2.6936-4.11	10DL/11HG
	ccqEA|FAS-A10-3	A10	69.51	66.7-71.5	2.50635	0.0437	3.259	10DL
	ccqEA|FAS-C1	C01	2.01	0-11.9	2.86006	-0.0496	3.7991	12DL
	ccqEA|FAS-C2-1	C02	42.91	40.4-44.9	2.67344	0.0506	2.8659	10DL
	ccqEA|FAS-C2-2	C02	63.68	63.39-63.97	2.59-7.24	-0.08--0.05	3.15-9.59	09DL/10DL/11DL/12DL/13DL/11WH
	ccqEA|FAS-C2-3	C02	70.11	69.61-70.6	3.95-8.1592	-0.0895--0.055	4.61-10.768	10DL/12DL
	ccqEA|FAS-C2-4	C02	71.79	71.28-72.3	2.60834-6.36	-0.07--0.05	3.1649-7.91	11DL/13DL/11WH
	ccqEA|FAS-C2-5	C02	79	78.25-79.76	5.49878-6.15	-0.079--0.0675	6.903-8.23	11DL/12DL
	ccqEA|FAS-C2-6	C02	87.51	87.4-92	2.62136	-0.0553	5.404	11GS
	ccqEA|FAS-C3-1	C03	31.81	30.7-33.7	2.60183	-0.0398	3.2923	13DL
	ccqEA|FAS-C3-2	C03	44.51	42.5-47.4	3.14433	-0.0433	3.9531	13DL
	ccqEA|FAS-C3-3	C03	53.31	49.7-57.9	2.83836	-0.0405	3.5775	13DL
	ccqEA|FAS-C3-4	C03	65.76	64.67-66.86	3.11-3.32444	-0.0631--0.04	3.91-3.9408	12DL/13DL
	ccqEA|FAS-C3-5	C03	71.71	70.3-75.2	3.47417	-0.0417	4.499	09DL
	ccqEA|FAS-C3-6	C03	76.11	75.2-77.7	3.48068	-0.0445	4.3577	13DL
	ccqEA|FAS-C3-7	C03	77.91	77.7-81	2.7559	-0.0463	3.2695	12DL
	ccqEA|FAS-C3-8	C03	81.1	80.03-82.18	3.031-4.774	-0.0479--0.043	3.22-6.1065	09DL/10DL/13DL
	ccqEA|FAS-C3-9	C03	99.31	93.5-101.9	3.8192	-0.0473	4.0318	10DL
	ccqEA|FAS-C3-10	C03	102.41	102.2-107.7	6.04996	-0.0647	7.6938	11DL
	ccqEA|FAS-C3-11	C03	110.51	107.7-112.6	2.81449	-0.0404	3.0078	10DL
	ccqEA|FAS-C3-12	C03	114.81	112.8-118.9	7.33894	-0.0716	9.2142	11DL
	ccqEA|FAS-C3-13	C03	123.24	122.06-124.41	2.79279-5.39	-0.063--0.0411	2.9797-6.92	10DL/11DL
	ccqEA|FAS-C4-1	C04	91.81	90.3-94.6	3.7975	0.0722	12.9344	10GS
	ccqEA|FAS-C4-2	C04	99.22	98.59-99.85	3.147-5.40981	0.0627-0.0905	7.54-17.5719	10GS/11GS
	ccqEA|FAS-C4-3	C04	106.71	104.92-108.51	3.758-4.32915	0.0731-0.081	10.1551-12.82	10GS/11GS
	ccqEA|FAS-C4-4	C04	125.91	115.3-135.2	3.19207	-0.0679	9.5431	10GS
	ccqEA|FAS-C5-1	C05	3.71	0-10.3	4.69805	0.0727	14.5985	10GS
	ccqEA|FAS-C5-2	C05	66.61	66-67.4	5.86985	-0.0519	7.6241	09DL
	ccqEA|FAS-C5-3	C05	68.63	68.32-68.95	3.69-7.09	-0.075--0.0608	5.1207-9.34	10DL/12DL/13DL/11HG
	ccqEA|FAS-C5-4	C05	74.51	73.5-75.3	5.56171	-0.0592	7.8409	13DL
	ccqEA|FAS-C5-5	C05	77.51	76.14-78.87	2.58-5.27	-0.073--0.041	2.98-7.25	10DL/11DL/12DL/11HG
	ccqEA|FAS-C5-6	C05	80.51	78-81.2	3.38303	-0.0607	11.068	10GS
	ccqEA|FAS-C5-7	C05	88.21	87.3-93	4.45935	-0.0679	13.9201	10GS
	ccqEA|FAS-C5-8	C05	110.71	105.5-112.7	2.55409	0.0496	3.1901	11HG
	ccqEA|FAS-C5-9	C05	143.91	136.8-151.01	2.81883-3.478	0.0455-0.0562	3.1776-4.407	11DL/12DL
	ccqEA|FAS-C5-10	C05	151.91	143.9-165.6	2.91865	0.0504	4.5399	10DL
	ccqEA|FAS-C6-1	C06	22.91	20.5-26.5	2.54758	0.0388	3.2406	13DL
	ccqEA|FAS-C6-2	C06	49.11	48.7-51	3.37869	0.0644	4.6411	11HG
	ccqEA|FAS-C6-3	C06	56.01	55.42-56.59	2.67344-3.795	0.0468-0.0736	3.1755-5.69	11DL/11HG
	ccqEA|FAS-C6-4	C06	60.91	60.8-61.3	4.59606	0.0755	6.2529	11HG
	ccqEA|FAS-C6-5	C06	68.01	67.9-71	3.61088	0.0663	4.8932	11WH
	ccqEA|FAS-C6-6	C06	73.46	72.92-73.99	2.66-3.41992	0.0478-0.0606	3.42-4.6478	12DL/11WH
	ccqEA|FAS-C6-7	C06	80.71	79.2-82.23	3.788-5.79173	0.07-0.1026	7.328-7.7089	12DL/11WH
	ccqEA|FAS-C8	C08	104.41	101.7-106.5	2.69297	-0.0587	6.1166	11GS
FAS	ccqFAS|OA-A1-1	A01	0.51	-0.4-1.42	4.70022-4.84	-2.0--1.679	5.9179-6.5	09DL/DL
	ccqFAS|OA-A1-2	A01	7.15	4.99-9.3	4.76966-6.4	-2.21--1.6874	6.0285-7.89	09DL/DL
	ccqFAS|OA-A1-3	A01	17.93	14.51-21.35	4.35085-7.167	-2.9949--2.41	9.68-12.4103	12DL/11GS
	ccqFAS|OA-A1-4	A01	28.93	28.4-29.47	6.29083-6.51	-3.41--2.4463	7.4614-16.18	11HG/GS
	ccqFAS|OA-A1-5	A01	34.32	33.27-35.37	3.36-7.34111	-1.55--2.6315	4.19-8.7249	10DL/13DL/11HG
	ccqFAS|OA-A1-6	A01	38.21	36.2-39.6	3.96676	-2.7046	10.3491	11GS
	ccqFAS|OA-A1-7	A01	43.21	42.7-44.1	4.18159	-1.9658	5.0852	11HG
	ccqFAS|OA-A1-8	A01	89.01	85.6-96	3.15518	-1.3868	4.1696	09DL
	ccqFAS|OA-LA3-1	A03	41.51	40.8-44.4	5.06478	-1.9995	6.3968	13DL
	ccqFAS|OA-GA3-2	A03	43.21	42.6-44.4	3.25066	-1.7767	3.3927	11HG
	ccqFAS|OA-A3-3	A03	51.01	50.3-51.8	3.40907	-1.6871	4.383	13DL
	ccqFAS|OA-A3-4	A03	54.21	51.8-56	2.8861	-1.6589	3.0387	11HG
	ccqFAS|OA-A3-5	A03	111.11	109.2-112.1	3.30925	1.6416	3.4549	11HG
	ccqFAS|OA-A3-6	A03	122.91	121.9-125.2	2.9512	1.3694	3.3064	12DL
	ccqFAS|OA-A4	A04	52.41	49.4-54.6	2.64306	-2.7463	5.8076	14YL
	ccqFAS|OA-LA5-1	A05	42.61	41.3-43.9	3.50238	1.599	4.5734	13DL
	ccqFAS|OA-A5-2	A05	52.41	50.9-53.1	2.83402	1.4122	3.4942	10DL
	ccqFAS|OA-A5-3	A05	55.51	53.6-56.5	6.59897	2.1806	8.364	13DL
	ccqFAS|OA-A6-1	A06	0.01	0-2	2.65608	-1.482	2.9995	11WH
	ccqFAS|OA-A6-2	A06	10.81	8.29-13.32	3.35699-4.155	-1.5--1.82	4.0-4.58	11DL/13DL/11WH
	ccqFAS|OA-A6-5	A06	11.11	4.5-15.4	3.03583	-1.3811	3.39	12DL
	ccqFAS|OA-A6-6	A06	16.81	13.3-25.7	3.06838	-1.4062	3.5361	13DL
	ccqFAS|OA-A6-7	A06	30.91	29.1-31.7	2.89261	-1.3979	3.5418	13DL
	ccqFAS|OA-A6-8	A06	64.41	63.5-66.6	4.37038	-1.9583	4.994	11HG
	ccqFAS|OA-A6-9	A06	67.11	66.6-68	2.82751	-1.3477	3.1836	12DL
	ccqFAS|OA-A6-10	A06	95.01	92-99.7	3.55663	1.925	3.924	11HG
	ccqFAS|OA-A6-11	A06	121.31	116.1-122.3	2.68429	1.5126	2.8627	11HG
	ccqFAS|OA-A7-1	A07	11.71	11.2-12.21	4.55-7.67	2.2-3.15	8.93-13.22	09DL/10DL/11WH
	ccqFAS|OA-A7-2	A07	17.41	16.8-17.6	7.3997	2.4064	10.0873	10DL
	ccqFAS|OA-A7-2	A07	19.75	19.37-20.13	2.64306-8.87	1.3639-2.899	3.1818-11.25	09DL/11DL/13DL/11WH
	ccqFAS|OA-A7-3	A07	22.9	22.24-23.56	6.63-8.71472	2.03-2.9822	9.11-11.1859	09DL/10DL/11WH
	ccqFAS|OA-A7-4	A07	28.11	27.4-28.9	7.36281	2.6755	9.4831	11WH
	ccqFAS|OA-A7-5	A07	98.01	85.6-104.3	4.10998	1.9091	4.9446	11WH
	ccqFAS|OA-A7-6	A07	107.91	106.3-109.3	3.81052	2.0448	5.4058	11WH
	ccqFAS|OA-A7-7	A07	122.41	122.2-125	3.01413	2.1033	10.9136	10GS
	ccqFAS|OA-A7-8	A07	125.81	123.9-126.8	2.82968	-1.7596	4.9973	14YL
	ccqFAS|OA-A8-1	A08	2.14	-0.24-4.52	2.94-4.01	-2.6732--1.567	5.05-9.5294	09DL/10DL/11GS
	ccqFAS|OA-A8-2	A08	14.11	7.6-16.1	3.14433	-1.2609	3.6134	09DL
	ccqFAS|OA-A8-3	A08	17.11	16.19-18.02	2.85572-4.37	-1.92--1.4822	3.9852-6.36	10DL/11DL
	ccqFAS|OA-A8-4	A08	24.3	23.38-25.21	3.712-6.8572	-2.4888--1.37	4.37-8.0114	09DL/11DL/11HG
	ccqFAS|OA-A8-5	A08	28.11	27.6-29.6	6.82248	-2.174	8.4634	12DL
	ccqFAS|OA-A8-6	A08	31.44	30.92-31.96	2.82-3.94289	-1.376--1.742	3.5-4.5365	09DL/10DL/11HG
	ccqFAS|OA-A8-7	A08	32.91	31.6-33.3	4.2749	-1.7329	5.4479	12DL
	ccqFAS|OA-A8-8	A08	38.71	38.5-49	2.62787	-1.1386	3.0302	09DL
	ccqFAS|OA-A9-1	A09	73.81	67-76.9	2.93601	1.2126	3.3719	09DL
	ccqFAS|OA-A9-2	A09	106.71	105.5-106.9	2.52371	-1.3979	3.1488	11DL
	ccqFAS|OA-A9-3	A09	132.71	131.7-134.1	6.13242	-2.1948	8.113	11DL
	ccqFAS|OA-A9-4	A09	136.21	135.4-137.5	5.88287	-2.4254	7.5794	11WH
	ccqFAS|OA-A9-5	A09	139.58	139.35-139.82	4.23-6.31036	-2.73--2.5473	8.1298-10.45	11WH/11GS
	ccqFAS|OA-A9-6	A09	145.99	145.43-146.56	5.16-12.66	-3.58--2.35	10.54-15.91	09DL/10DL/11WH/11HG/11GS
	ccqFAS|OA-A9-7	A09	151.93	151.47-152.4	3.45-9.90605	-3.1761--2.36	8.677-12.784	11HG/11GS
	ccqFAS|OA-A9-8	A09	152.71	152.1-155.4	6.65322	-2.547	8.6282	11WH
	ccqFAS|OA-A10-1	A10	55.91	53.5-57.1	3.07923	-1.4624	3.5468	13DL
	ccqFAS|OA-A10-2	A10	61.41	59-67.5	3.33963	-1.5237	3.9229	13DL
	ccqFAS|OA-A10-3	A10	64.21	58.6-65.6	2.87959	-1.4748	3.5455	10DL
	ccqFAS|OA-C1	C01	93.11	93-94	2.55192	1.9578	5.9782	11GS
	ccqFAS|OA-C2-1	C02	50.51	50-54.5	2.75156	1.2472	3.1662	09DL
	ccqFAS|OA-C2-2	C02	56.61	55.5-57.8	2.77326	1.2905	3.1895	09DL
	ccqFAS|OA-C2-3	C02	63.21	62.7-63.71	2.69-4.99	1.3452-1.93	3.24-6.07	09DL/11DL/12DL/13DL
	ccqFAS|OA-C2-4	C02	66.31	65.8-68.8	4.18593	1.8068	5.131	12DL
	ccqFAS|OA-C2-5	C02	70.71	69.5-71.2	3.41775	1.473	3.9098	09DL
	ccqFAS|OA-C2-6	C02	75.91	75.5-77.7	2.72552	1.4366	3.1515	13DL
	ccqFAS|OA-C2-7	C02	84.61	82.5-85.9	3.12263	1.568	4.2576	13DL
	ccqFAS|OA-C3-1	C03	5.91	5.2-7	3.41775	2.2422	11.7867	10GS
	ccqFAS|OA-C3-2	C03	16.81	14.7-17.4	4.37689	2.4895	14.6599	10GS
	ccqFAS|OA-C3-3	C03	20.11	18.4-21	4.43331	2.4907	14.8446	10GS
	ccqFAS|OA-C3-4	C03	25.71	25.1-26.2	3.64994	2.2423	12.5197	10GS
	ccqFAS|OA-C3-5	C03	44.31	42.9-44.9	4.08828	1.7222	5.2158	13DL
	ccqFAS|OA-C3-6	C03	53.31	50.7-57	5.30999	1.9584	6.6863	13DL
	ccqFAS|OA-C3-7	C03	61.01	57.9-62.5	5.02138	1.9595	6.3434	13DL
	ccqFAS|OA-C3-8	C03	73.31	70.2-73.6	7.23695	2.3895	9.6111	12DL
	ccqFAS|OA-C3-9	C03	76.11	75.8-77.7	9.95813	2.7214	12.7728	12DL
	ccqFAS|OA-C3-10	C03	99.31	97.21-101.4	5.35556-5.52	1.7391-2.06	6.8565-7.29	09DL/11DL
	ccqFAS|OA-C3-11	C03	108.95	107.43-110.47	4.2-6.31904	1.85-2.21	5.93-8.7	09DL/11DL/11WH
	ccqFAS|OA-C3-12	C03	117.22	116.39-118.05	4.76749-6.84	1.911-2.13	6.13-8.63	09DL/11DL/11WH
	ccqFAS|OA-C3-13	C03	124.51	123.5-126.3	4.3834	1.8802	6.2046	10DL
	ccqFAS|OA-C3-14	C03	147.01	146.3-149.1	2.67995	-1.7447	3.3083	10DL
	ccqFAS|OA-C3-15	C03	174.94	174.08-175.79	2.9-7.32	-2.78--1.39	3.24-9.58	11DL/12DL/11HG
	ccqFAS|OA-C3-16	C03	182.9	182.43-183.38	4.09479-12.63	-3.65--1.5942	5.4032-17.06	09DL/13DL/11WH
	ccqFAS|OA-C3-17	C03	184.4	184.26-184.55	5.72-14.79	-3.89--1.94	6.23-19.58	11DL/12DL/11WH/11HG
	ccqFAS|OA-C3-18	C03	186.51	185.8-189.7	5.12988	-1.9792	6.8777	10DL
	ccqFAS|OA-C3-19	C03	191.91	191.31-192.5	3.6673-11.65	-3.72--1.7782	5.4402-17.57	10DL/11DL/12DL/13DL/11WH
	ccqFAS|OA-C3-20	C03	192.71	190.48-194.93	7.13062-8.84	-3.13--2.0866	9.2008-11.37	09DL/11HG
	ccqFAS|OA-C3-21	C03	202.21	194-207.1	3.02715	-1.9917	6.2809	14YL
	ccqFAS|OA-C3-22	C03	210.11	209.5-213.4	4.02101	-1.5848	4.4455	12DL
	ccqFAS|OA-C4-1	C04	39.81	32.1-44.9	2.66042	1.9363	5.5853	11GS
	ccqFAS|OA-C4-2	C04	57.61	50.2-59.2	2.65391	1.3983	3.2454	11DL
	ccqFAS|OA-C4-3	C04	64.21	61-65.3	2.76241	1.446	3.3447	11DL
	ccqFAS|OA-C5-1	C05	56.11	55.5-59	4.09913	1.696	5.2689	12DL
	ccqFAS|OA-C5-2	C05	65.21	61.1-66	2.89261	1.5383	3.0389	11HG
	ccqFAS|OA-C5-3	C05	68.61	68.2-69.7	3.65428	1.7116	4.7226	11DL
	ccqFAS|OA-C5-4	C05	76.79	76.26-77.31	2.58-5.4	1.35-1.96	2.9257-6.94	11DL/12DL/13DL/11HG
	ccqFAS|OA-C6-1	C06	16.31	11.1-17.3	3.32227	-1.6911	3.4644	11HG
	ccqFAS|OA-C6-2	C06	22.91	20.5-26.4	3.48719	-1.7533	3.6331	11HG
[truncated: 247 more rows]
